# Supplementary material for: The impact of nitrogen oxides on electrochemical carbon dioxide reduction
Source: PubMed Central journal article supplement (PMC7672067; doi:10.1038/s41467-020-19731-8), 2020-11-17
Supplement: 41467_2020_19731_MOESM1_ESM.pdf [file 41467_2020_19731_MOESM1_ESM.pdf]

## Supplementary Information

### **The impact of nitrogen oxides on electrochemical carbon dioxide reduction**

Byung Hee Ko,<sup>1</sup> Bjorn Hasa,<sup>1</sup> Haeun Shin,<sup>1</sup> Emily Jeng,<sup>1</sup> Sean Overa,<sup>1</sup> Wilson Chen,<sup>1</sup> and Feng Jiao<sup>1\*</sup>

[1] Center for Catalytic Science and Technology, Department of Chemical and Biomolecular Engineering, University of Delaware, Newark, DE, 19716 (USA)

\*Corresponding author: [jjiao@udel.edu](mailto:jjiao@udel.edu)

**Supplementary Table 1.** Standard potentials for CO<sub>2</sub>RR, HER, NO<sub>2</sub>RR, NORR, and N<sub>2</sub>ORR.<sup>1-3</sup>

|                         | Reactions                                                                                                        | Standard potential<br>(V vs. RHE) |
|-------------------------|------------------------------------------------------------------------------------------------------------------|-----------------------------------|
| <b>CO<sub>2</sub>RR</b> | $\text{CO}_2 + 2\text{H}^+ + 2\text{e}^- \leftrightarrow \text{HCOOH}$                                           | -0.250                            |
|                         | $\text{CO}_2 + 2\text{H}^+ + 2\text{e}^- \leftrightarrow \text{CO} + \text{H}_2\text{O}$                         | -0.106                            |
|                         | $2\text{CO}_2 + 12\text{H}^+ + 12\text{e}^- \leftrightarrow \text{C}_2\text{H}_4 + 4\text{H}_2\text{O}$          | 0.064                             |
|                         | $2\text{CO}_2 + 12\text{H}^+ + 12\text{e}^- \leftrightarrow \text{C}_2\text{H}_5\text{OH} + 3\text{H}_2\text{O}$ | 0.084                             |
|                         | $3\text{CO}_2 + 18\text{H}^+ + 18\text{e}^- \leftrightarrow \text{C}_3\text{H}_7\text{OH} + 5\text{H}_2\text{O}$ | 0.095                             |
|                         | $\text{CO}_2 + 8\text{H}^+ + 8\text{e}^- \leftrightarrow \text{CH}_4 + \text{H}_2\text{O}$                       | 0.169                             |
| <b>HER</b>              | $2\text{H}^+ + 2\text{e}^- \leftrightarrow \text{H}_2$                                                           | 0                                 |
| <b>NO<sub>2</sub>RR</b> | $\text{NO}_2 + 7\text{H}^+ + 7\text{e}^- \leftrightarrow \text{NH}_3 + 2\text{H}_2\text{O}$                      | 0.80                              |
|                         | $\text{NO}_2 + 2\text{H}^+ + 2\text{e}^- \leftrightarrow \text{NO} + \text{H}_2\text{O}$                         | 1.05                              |
|                         | $\text{NO}_2 + \text{H}^+ + \text{e}^- \leftrightarrow \text{HNO}_2$                                             | 1.10                              |
|                         | $2\text{NO}_2 + 6\text{H}^+ + 6\text{e}^- \leftrightarrow \text{N}_2\text{O} + 3\text{H}_2\text{O}$              | 1.23                              |
|                         | $2\text{NO}_2 + 8\text{H}^+ + 8\text{e}^- \leftrightarrow \text{N}_2 + 4\text{H}_2\text{O}$                      | 1.36                              |
| <b>NORR</b>             | $\text{NO} + 3\text{H}^+ + 3\text{e}^- \leftrightarrow \text{NH}_2\text{OH}$                                     | 0.38                              |
|                         | $\text{NO} + 5\text{H}^+ + 5\text{e}^- \leftrightarrow \text{NH}_3 + \text{H}_2\text{O}$                         | 0.71                              |
|                         | $2\text{NO} + 2\text{H}^+ + 2\text{e}^- \leftrightarrow \text{N}_2\text{O} + \text{H}_2\text{O}$                 | 1.59                              |
|                         | $2\text{NO} + 4\text{H}^+ + 4\text{e}^- \leftrightarrow \text{N}_2 + 2\text{H}_2\text{O}$                        | 1.68                              |
| <b>N<sub>2</sub>ORR</b> | $\text{N}_2\text{O} + 2\text{H}^+ + 2\text{e}^- \leftrightarrow \text{N}_2 + \text{H}_2\text{O}$                 | 1.77                              |

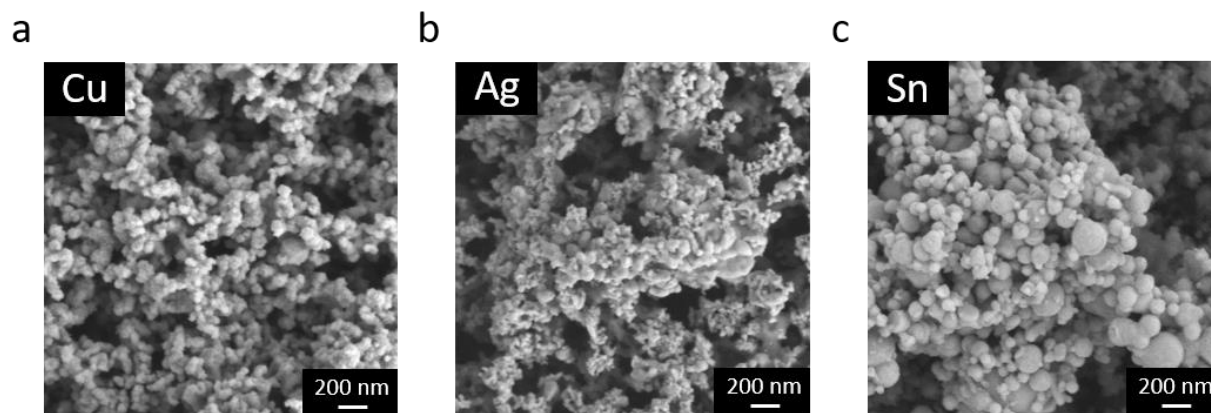

**Supplementary Figure 1.** SEM images of (a) Cu, (b) Ag, and (c) Sn electrodes before electrolysis. Metal particles are deposited uniformly on GDL.

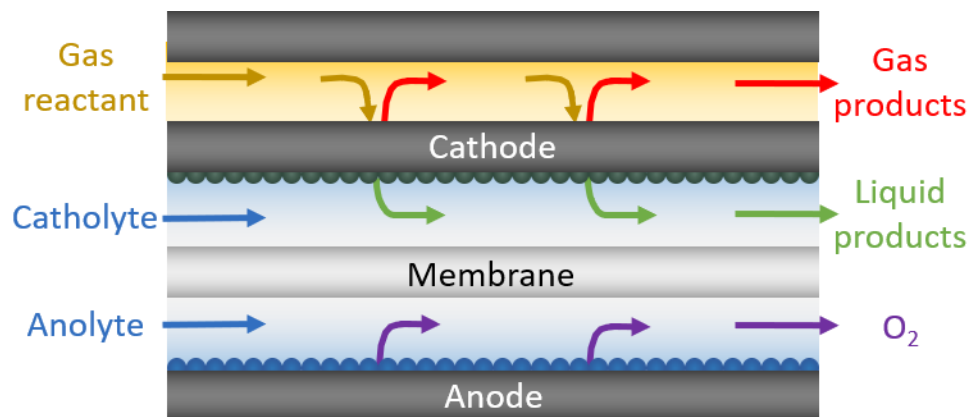

**Supplementary Figure 2.** Schematic of the three-compartment flow-cell. CO<sub>2</sub> gas is fed to the electrode-electrolyte interface without mass transport limitation, enabling CO<sub>2</sub>RR at high current densities.

**Supplementary Table 2.** CO<sub>2</sub> electroreduction performance with the introduction of 0.83% NO impurity at 0.5 h for 0.5 h on Cu catalyst at a constant current density of 100 mA cm<sup>-2</sup> in 1M KHCO<sub>3</sub> for 3 h. <3% FE of formate was detected from the anolyte side.

| Time (h) | Feed                                                     | Faradaic efficiency (%) |                 |      |                               |      |         |      |         |       |
|----------|----------------------------------------------------------|-------------------------|-----------------|------|-------------------------------|------|---------|------|---------|-------|
|          |                                                          | H <sub>2</sub>          | CH <sub>4</sub> | CO   | C <sub>2</sub> H <sub>4</sub> | EtOH | Acetate | PrOH | Formate | Total |
| 0.17     | 83.3% CO <sub>2</sub><br>and 16.7% Ar                    | 13.7                    | 2.5             | 34.5 | 16.2                          | 9.0  | 0.7     | 5.0  | 9.1     | 90.5  |
| 0.39     |                                                          | 14.4                    | 2.3             | 34.1 | 15.2                          | 7.0  | 0.7     | 4.1  | 10.0    | 87.6  |
| 0.67     | 83.3% CO <sub>2</sub> , 15.87% Ar,<br>and 0.83% NO in Ar | 14.6                    | 1.0             | 19.8 | 7.7                           | 3.0  | 0.3     | 1.4  | 6.7     | 54.5  |
| 0.89     |                                                          | 15.5                    | 1.1             | 18.9 | 7.0                           | 2.3  | 0.2     | 1.5  | 7.1     | 53.7  |
| 1.2      | 83.3% CO <sub>2</sub><br>and 16.7% Ar                    | 19.9                    | 2.3             | 30.6 | 13.7                          | 4.9  | 0.5     | 3.9  | 11.1    | 86.9  |
| 1.4      |                                                          | 20.3                    | 2.1             | 28.3 | 13.7                          | 5.8  | 0.5     | 4.0  | 12.2    | 86.9  |
| 1.8      |                                                          | 21.6                    | 2.8             | 27.8 | 12.6                          | 5.0  | 0.7     | 4.1  | 13.2    | 87.7  |
| 2.3      |                                                          | 22.5                    | 2.4             | 27.8 | 12.9                          | 5.3  | 0.6     | 3.4  | 13.4    | 88.3  |
| 2.8      |                                                          | 24.1                    | 2.5             | 27.9 | 12.1                          | 4.4  | 0.7     | 3.5  | 13.0    | 88.4  |

**Supplementary Table 3.** CO<sub>2</sub> electroreduction performance with the introduction of 0.83% NO impurity at 0.5 h for 0.5 h on Ag catalyst at a constant current density of 100 mA cm<sup>-2</sup> in 1M KHCO<sub>3</sub> for 3 h. <2% FE of formate was detected from the anolyte side.

| Time (h) | Feed                                                     | Faradaic efficiency (%) |      |         |       |
|----------|----------------------------------------------------------|-------------------------|------|---------|-------|
|          |                                                          | H <sub>2</sub>          | CO   | Formate | Total |
| 0.17     | 83.3% CO <sub>2</sub><br>and 16.7% Ar                    | 8.0                     | 83.1 | 3.7     | 94.8  |
| 0.39     |                                                          | 10.0                    | 79.2 | 3.7     | 92.9  |
| 0.67     | 83.3% CO <sub>2</sub> , 15.87% Ar,<br>and 0.83% NO in Ar | 6.3                     | 53.1 | 2.9     | 62.3  |
| 0.89     |                                                          | 7.5                     | 54.4 | 3.6     | 65.5  |
| 1.2      | 83.3% CO <sub>2</sub><br>and 16.7% Ar                    | 11.1                    | 76.6 | 5.2     | 92.9  |
| 1.4      |                                                          | 11.6                    | 77.5 | 6.3     | 95.4  |
| 1.8      |                                                          | 12.0                    | 73.6 | 7.4     | 93.0  |
| 2.3      |                                                          | 13.4                    | 71.1 | 7.9     | 92.4  |
| 2.8      |                                                          | 14.5                    | 69.8 | 8.6     | 92.9  |

**Supplementary Table 4.** CO<sub>2</sub> electroreduction performance with the introduction of 0.83% NO impurity at 0.5 h for 0.5 h on Sn catalyst at a constant current density of 100 mA cm<sup>-2</sup> in 1M KHCO<sub>3</sub> for 3 h. 5-10% FE of formate was detected from the anolyte side and is included in the formate FE.

| Time (h) | Feed                                                     | Faradaic efficiency (%) |     |         |       |
|----------|----------------------------------------------------------|-------------------------|-----|---------|-------|
|          |                                                          | H <sub>2</sub>          | CO  | Formate | Total |
| 0.17     | 83.3% CO <sub>2</sub><br>and 16.7% Ar                    | 4.6                     | 3.8 | 88.1    | 96.6  |
| 0.39     |                                                          | 4.5                     | 4.3 | 81.4    | 90.3  |
| 0.67     | 83.3% CO <sub>2</sub> , 15.87% Ar,<br>and 0.83% NO in Ar | 4.2                     | 3.9 | 55.4    | 63.5  |
| 0.89     |                                                          | 4.6                     | 4.0 | 54.0    | 62.7  |
| 1.2      | 83.3% CO <sub>2</sub><br>and 16.7% Ar                    | 5.0                     | 5.1 | 80.0    | 90.1  |
| 1.4      |                                                          | 5.6                     | 5.2 | 78.1    | 88.9  |
| 1.8      |                                                          | 7.4                     | 5.2 | 76.3    | 88.9  |
| 2.3      |                                                          | 8.1                     | 5.1 | 77.8    | 91.0  |
| 2.8      |                                                          | 9.0                     | 5.5 | 76.9    | 91.4  |

**Supplementary Table 5.** Conversion of NO during CO<sub>2</sub>RR with the introduction of 0.83% NO, assuming NO is fully converted to NH<sub>3</sub>. *Conversion (%) =  $\frac{\text{Current loss due to NO}}{\text{Current required to fully convert NO to NH}_3} \times 100$ .* Full conversion of NO to NH<sub>3</sub> requires 57.4 mA.

| Catalyst       | Cu   | Ag   | Sn   |
|----------------|------|------|------|
| Conversion (%) | 59.1 | 51.6 | 48.7 |



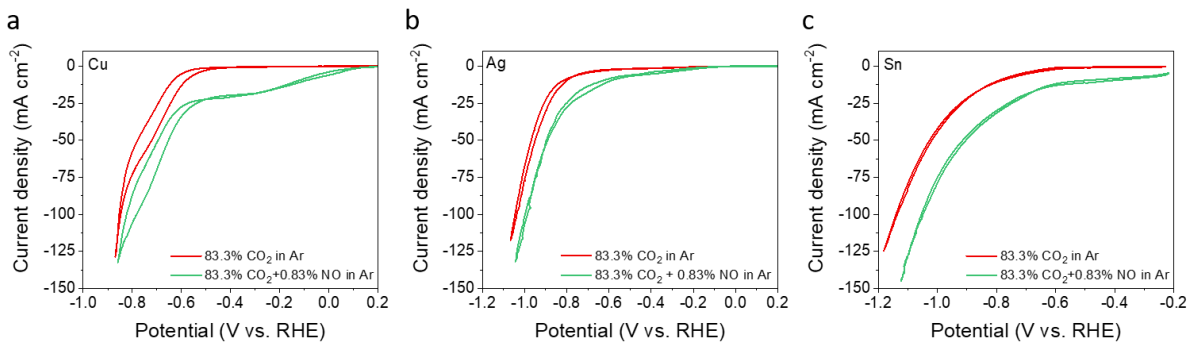

**Supplementary Figure 3.** Cyclic voltammograms on (a) Cu, (b) Ag, and (c) Sn catalysts in 1M  $\text{KHCO}_3$  under 83.3%  $\text{CO}_2$  and 16.7% Ar, and 83.3%  $\text{CO}_2$ , 15.87% Ar, and 0.83% NO. Scan rate:  $50 \text{ mV s}^{-1}$ . Onset potentials and cathodic currents shifted to more positive potentials when 0.83% NO was introduced, suggesting that NORR is more favorable than  $\text{CO}_2\text{RR}$  on all three catalysts.

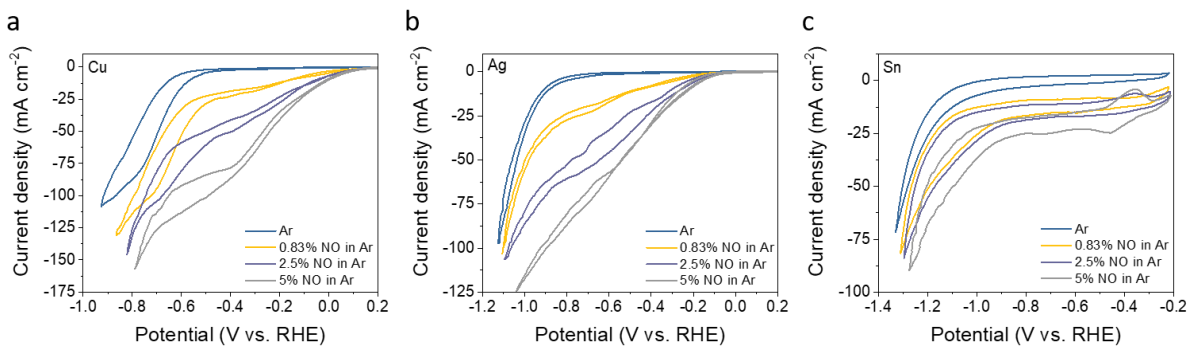

**Supplementary Figure 4.** Cyclic voltammograms on (a) Cu, (b) Ag, and (c) Sn catalysts in 1M  $\text{KHCO}_3$  under different concentrations of NO in Ar. Scan rate:  $50 \text{ mV s}^{-1}$ . Onset potentials of NORR are more positive than  $\text{CO}_2\text{RR}$ , and shifts in CV measurements suggest that NORR is mass transport limited.

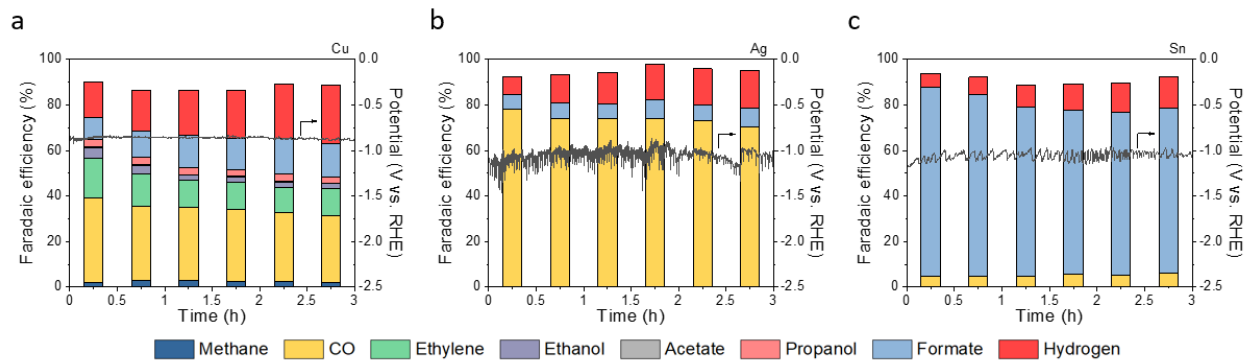

**Supplementary Figure 5.** Faradaic efficiency and applied potential vs. time with 83.3% CO<sub>2</sub> and 16.7% Ar on (a) Cu, (b) Ag, and (c) Sn catalysts at a constant current density of 100 mA cm<sup>-2</sup> in 1 M KHCO<sub>3</sub> for 3 h. H<sub>2</sub> Faradaic efficiency increases over time due to slow flooding of the electrode, suggesting that NO<sub>x</sub> is not responsible for the H<sub>2</sub> FE increase.

**Supplementary Table 6.** Loss in Faradaic efficiency during CO<sub>2</sub> electroreduction with the introduction of different concentrations of NO on Cu, Ag, and Sn catalysts.

| Concentrations of NO (%) | Cu (%) | Ag (%) | Sn (%) |
|--------------------------|--------|--------|--------|
| 0.0083                   | 0.4    | 0.6    | 1.4    |
| 0.083                    | 3.2    | 3.2    | 3.8    |
| 0.83                     | 33.9   | 29.6   | 27.9   |

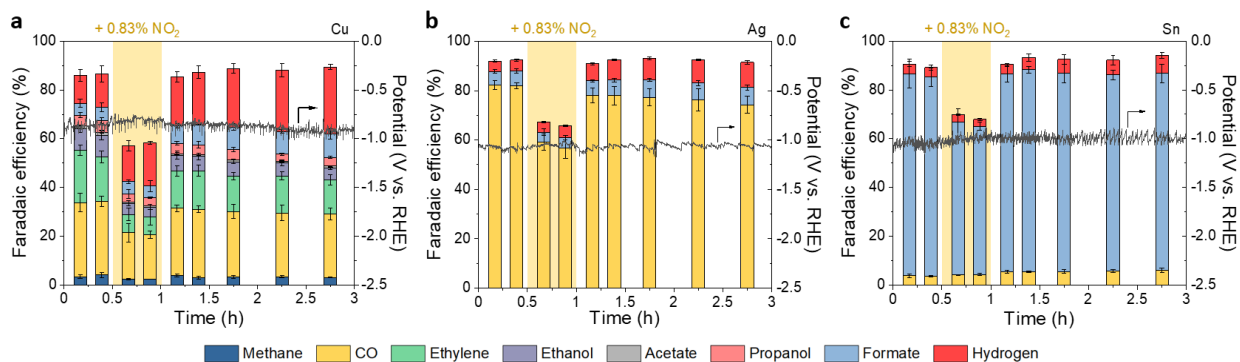

**Supplementary Figure 6.** Faradaic efficiency and applied potential vs. time on (a) Cu, (b) Ag, and (c) Sn catalysts at a constant current density of  $100 \text{ mA cm}^{-2}$  in  $1 \text{ M KHCO}_3$  for 3 h. Gas feeds were  $83.3\% \text{ CO}_2$  and  $16.7\% \text{ Ar}$ , and  $83.3\% \text{ CO}_2$ ,  $15.87\% \text{ Ar}$ , and  $0.83\% \text{ NO}_2$  (yellow).  $0.83\% \text{ NO}_2$  was introduced at 0.5 h for 0.5 h. Corresponding Faradaic efficiencies are provided in Tables S7-9. Error bars represent the standard deviation of three independent measurements. Faradaic efficiency decreases with the introduction of  $\text{NO}_2$  on all three catalysts.

**Supplementary Table 7.** CO<sub>2</sub> electroreduction performance with the introduction of 0.83% NO<sub>2</sub> impurity at 0.5 h for 0.5 h on Cu catalyst at a constant current density of 100 mA cm<sup>-2</sup> in 1M KHCO<sub>3</sub> for 3 h. <3% FE of formate was detected from the anolyte side.

| Time (h) | Feed                                                                  | Faradaic efficiency (%) |                 |      |                               |      |         |      |         |       |
|----------|-----------------------------------------------------------------------|-------------------------|-----------------|------|-------------------------------|------|---------|------|---------|-------|
|          |                                                                       | H <sub>2</sub>          | CH <sub>4</sub> | CO   | C <sub>2</sub> H <sub>4</sub> | EtOH | Acetate | PrOH | Formate | Total |
| 0.17     | 83.3% CO <sub>2</sub><br>and 16.7% Ar                                 | 11.4                    | 3.5             | 30.4 | 21.4                          | 8.9  | 1.1     | 4.4  | 4.9     | 86.0  |
| 0.39     |                                                                       | 13.7                    | 4.1             | 30.3 | 18.2                          | 8.9  | 1.2     | 4.6  | 5.6     | 86.6  |
| 0.67     | 83.3% CO <sub>2</sub> , 15.87% Ar,<br>and 0.83% NO <sub>2</sub> in Ar | 14.8                    | 2.3             | 19.2 | 7.5                           | 4.5  | 0.5     | 3.4  | 5.0     | 57.2  |
| 0.89     |                                                                       | 17.8                    | 2.5             | 18.1 | 7.3                           | 4.2  | 0.6     | 3.3  | 4.7     | 58.4  |
| 1.2      | 83.3% CO <sub>2</sub><br>and 16.7% Ar                                 | 20.2                    | 3.9             | 27.6 | 15.2                          | 6.5  | 0.7     | 4.2  | 7.2     | 85.4  |
| 1.4      |                                                                       | 21.6                    | 3.1             | 27.9 | 15.9                          | 5.9  | 0.8     | 3.9  | 8.2     | 87.3  |
| 1.8      |                                                                       | 24.0                    | 3.3             | 26.8 | 14.4                          | 6.0  | 0.9     | 4.3  | 9.1     | 88.8  |
| 2.3      |                                                                       | 25.1                    | 3.4             | 26.1 | 15.3                          | 5.3  | 0.7     | 3.0  | 9.3     | 88.1  |
| 2.8      |                                                                       | 27.4                    | 3.1             | 26.0 | 14.1                          | 4.7  | 0.8     | 3.6  | 9.7     | 89.4  |

**Supplementary Table 8.** CO<sub>2</sub> electroreduction performance with the introduction of 0.83% NO<sub>2</sub> impurity at 0.5 h for 0.5 h on Ag catalyst at a constant current density of 100 mA cm<sup>-2</sup> in 1M KHCO<sub>3</sub> for 3 h. <2% FE of formate was detected from the anolyte side.

| Time (h) | Feed                                                                  | Faradaic efficiency (%) |      |         |       |
|----------|-----------------------------------------------------------------------|-------------------------|------|---------|-------|
|          |                                                                       | H <sub>2</sub>          | CO   | Formate | Total |
| 0.17     | 83.3% CO <sub>2</sub><br>and 16.7% Ar                                 | 4.2                     | 82.3 | 5.4     | 92.0  |
| 0.39     |                                                                       | 4.4                     | 81.9 | 6.0     | 92.3  |
| 0.67     | 83.3% CO <sub>2</sub> , 15.87% Ar,<br>and 0.83% NO <sub>2</sub> in Ar | 4.2                     | 59.0 | 4.0     | 67.3  |
| 0.89     |                                                                       | 4.8                     | 56.8 | 4.3     | 65.8  |
| 1.2      | 83.3% CO <sub>2</sub><br>and 16.7% Ar                                 | 6.9                     | 78.1 | 5.9     | 90.9  |
| 1.4      |                                                                       | 8.3                     | 77.9 | 6.3     | 92.5  |
| 1.8      |                                                                       | 8.9                     | 77.3 | 7.0     | 93.2  |
| 2.3      |                                                                       | 9.4                     | 76.2 | 6.8     | 92.4  |
| 2.8      |                                                                       | 10.2                    | 74.2 | 7.0     | 91.4  |

**Supplementary Table 9.** CO<sub>2</sub> electroreduction performance with the introduction of 0.83% NO<sub>2</sub> impurity at 0.5 h for 0.5 h on Sn catalyst at a constant current density of 100 mA cm<sup>-2</sup> in 1M KHCO<sub>3</sub> for 3 h. 5-10% FE of formate was detected from the anolyte side and is included in the formate FE.

| Time (h) | Feed                                                                  | Faradaic efficiency (%) |     |         |       |
|----------|-----------------------------------------------------------------------|-------------------------|-----|---------|-------|
|          |                                                                       | H <sub>2</sub>          | CO  | Formate | Total |
| 0.17     | 83.3% CO <sub>2</sub><br>and 16.7% Ar                                 | 4.0                     | 3.9 | 82.7    | 90.6  |
| 0.39     |                                                                       | 4.0                     | 3.8 | 81.4    | 89.2  |
| 0.67     | 83.3% CO <sub>2</sub> , 15.87% Ar,<br>and 0.83% NO <sub>2</sub> in Ar | 3.1                     | 4.2 | 62.5    | 69.8  |
| 0.89     |                                                                       | 2.8                     | 4.4 | 60.8    | 67.9  |
| 1.2      | 83.3% CO <sub>2</sub><br>and 16.7% Ar                                 | 4.0                     | 5.5 | 80.9    | 90.4  |
| 1.4      |                                                                       | 5.0                     | 5.5 | 82.8    | 93.3  |
| 1.8      |                                                                       | 5.8                     | 5.7 | 81.1    | 92.5  |
| 2.3      |                                                                       | 6.2                     | 5.8 | 80.3    | 92.2  |
| 2.8      |                                                                       | 7.4                     | 6.2 | 80.6    | 94.2  |



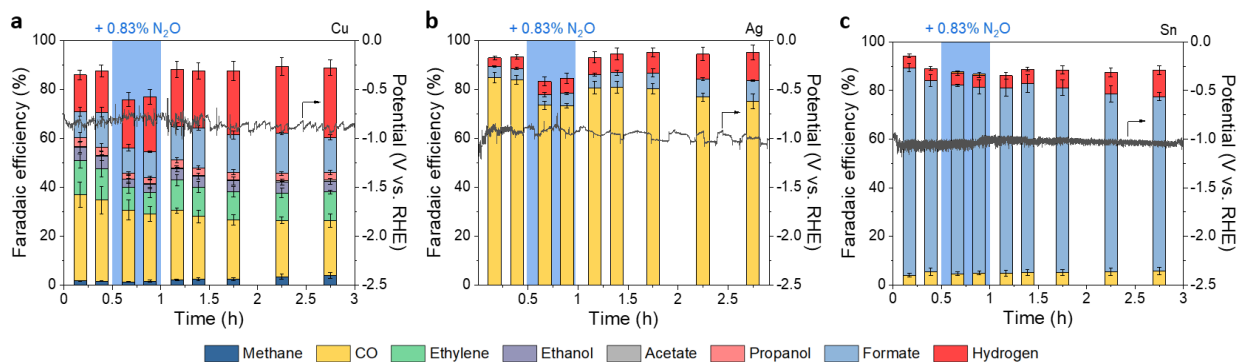

**Supplementary Figure 7.** Faradaic efficiency and applied potential vs. time on (a) Cu, (b) Ag, and (c) Sn catalysts at a constant current density of  $100 \text{ mA cm}^{-2}$  in  $1 \text{ M KHCO}_3$  for 3 h. Gas feeds were  $83.3\% \text{ CO}_2$  and  $16.7\% \text{ Ar}$ , and  $83.3\% \text{ CO}_2$ ,  $15.87\% \text{ Ar}$ , and  $0.83\% \text{ N}_2\text{O}$  (blue).  $0.83\% \text{ N}_2\text{O}$  was introduced at 0.5 h for 0.5 h. Corresponding Faradaic efficiencies are provided in Tables S10-12. Error bars represent the standard deviation of three independent measurements. Faradaic efficiency decreases with the introduction of  $\text{N}_2\text{O}$  on Cu and Ag catalysts, while  $\text{N}_2\text{O}$  has negligible effect on Sn catalyst.

**Supplementary Table 10.** CO<sub>2</sub> electroreduction performance with the introduction of 0.83% N<sub>2</sub>O impurity at 0.5 h for 0.5 h on Cu catalyst at a constant current density of 100 mA cm<sup>-2</sup> in 1M KHCO<sub>3</sub> for 3 h. <3% FE of formate was detected from the anolyte side.

| Time (h) | Feed                                                                   | Faradaic efficiency (%) |                 |      |                               |      |         |      |         |       |
|----------|------------------------------------------------------------------------|-------------------------|-----------------|------|-------------------------------|------|---------|------|---------|-------|
|          |                                                                        | H <sub>2</sub>          | CH <sub>4</sub> | CO   | C <sub>2</sub> H <sub>4</sub> | EtOH | Acetate | PrOH | Formate | Total |
| 0.17     | 83.3% CO <sub>2</sub><br>and 16.7% Ar                                  | 15.0                    | 1.8             | 35.2 | 13.9                          | 5.6  | 0.3     | 3.7  | 10.5    | 85.9  |
| 0.39     |                                                                        | 16.9                    | 1.7             | 33.0 | 12.8                          | 5.2  | 0.3     | 3.3  | 14.2    | 87.5  |
| 0.67     | 83.3% CO <sub>2</sub> , 15.87% Ar,<br>and 0.83% N <sub>2</sub> O in Ar | 19.6                    | 1.4             | 29.4 | 9.2                           | 3.3  | 0.2     | 2.3  | 10.4    | 75.7  |
| 0.89     |                                                                        | 22.4                    | 1.6             | 27.6 | 8.6                           | 3.6  | 0.2     | 2.2  | 10.7    | 77.0  |
| 1.2      | 83.3% CO <sub>2</sub><br>and 16.7% Ar                                  | 23.2                    | 2.1             | 28.4 | 12.4                          | 4.6  | 0.4     | 3.1  | 13.8    | 88.1  |
| 1.4      |                                                                        | 23.3                    | 2.5             | 25.6 | 12.0                          | 4.5  | 0.3     | 3.1  | 16.2    | 87.5  |
| 1.8      |                                                                        | 26.1                    | 2.6             | 24.1 | 11.5                          | 4.4  | 0.5     | 3.0  | 15.2    | 87.5  |
| 2.3      |                                                                        | 27.4                    | 3.5             | 23.0 | 11.2                          | 4.4  | 0.5     | 3.0  | 16.4    | 89.4  |
| 2.8      |                                                                        | 28.4                    | 4.1             | 22.3 | 11.7                          | 4.3  | 0.6     | 3.1  | 14.3    | 88.8  |

**Supplementary Table 11.** CO<sub>2</sub> electroreduction performance with the introduction of 0.83% N<sub>2</sub>O impurity at 0.5 h for 0.5 h on Ag catalyst at a constant current density of 100 mA cm<sup>-2</sup> in 1M KHCO<sub>3</sub> for 3 h. <2% FE of formate was detected from the anolyte side.

| Time (h) | Feed                                                                   | Faradaic efficiency (%) |      |         |       |
|----------|------------------------------------------------------------------------|-------------------------|------|---------|-------|
|          |                                                                        | H <sub>2</sub>          | CO   | Formate | Total |
| 0.17     | 83.3% CO <sub>2</sub><br>and 16.7% Ar                                  | 3.5                     | 84.9 | 4.4     | 92.8  |
| 0.39     |                                                                        | 4.7                     | 83.9 | 4.6     | 93.2  |
| 0.67     | 83.3% CO <sub>2</sub> , 15.87% Ar,<br>and 0.83% N <sub>2</sub> O in Ar | 5.4                     | 73.4 | 4.4     | 83.3  |
| 0.89     |                                                                        | 6.1                     | 73.3 | 5.0     | 84.5  |
| 1.2      | 83.3% CO <sub>2</sub><br>and 16.7% Ar                                  | 7.1                     | 80.7 | 5.3     | 93.1  |
| 1.4      |                                                                        | 7.7                     | 80.8 | 6.0     | 94.5  |
| 1.8      |                                                                        | 8.5                     | 80.2 | 6.5     | 95.2  |
| 2.3      |                                                                        | 10.1                    | 76.9 | 7.4     | 94.4  |
| 2.8      |                                                                        | 11.5                    | 75.1 | 8.5     | 95.1  |

**Supplementary Table 12.** CO<sub>2</sub> electroreduction performance with the introduction of 0.83% N<sub>2</sub>O impurity at 0.5 h for 0.5 h on Sn catalyst at a constant current density of 100 mA cm<sup>-2</sup> in 1M KHCO<sub>3</sub> for 3 h. 5-10% FE of formate was detected from the anolyte side and is included in the formate FE.

| Time (h) | Feed                                                                   | Faradaic efficiency (%) |     |         |       |
|----------|------------------------------------------------------------------------|-------------------------|-----|---------|-------|
|          |                                                                        | H <sub>2</sub>          | CO  | Formate | Total |
| 0.17     | 83.3% CO <sub>2</sub><br>and 16.7% Ar                                  | 4.9                     | 3.9 | 85.4    | 94.3  |
| 0.39     |                                                                        | 4.9                     | 5.4 | 78.7    | 89.0  |
| 0.67     | 83.3% CO <sub>2</sub> , 15.87% Ar,<br>and 0.83% N <sub>2</sub> O in Ar | 4.9                     | 4.6 | 77.6    | 87.1  |
| 0.89     |                                                                        | 4.8                     | 4.9 | 76.6    | 86.2  |
| 1.2      | 83.3% CO <sub>2</sub><br>and 16.7% Ar                                  | 5.1                     | 4.8 | 76.2    | 86.1  |
| 1.4      |                                                                        | 5.9                     | 5.2 | 77.7    | 88.7  |
| 1.8      |                                                                        | 7.3                     | 5.2 | 76.0    | 88.5  |
| 2.3      |                                                                        | 9.0                     | 5.4 | 73.1    | 87.5  |
| 2.8      |                                                                        | 10.9                    | 5.7 | 71.8    | 88.4  |

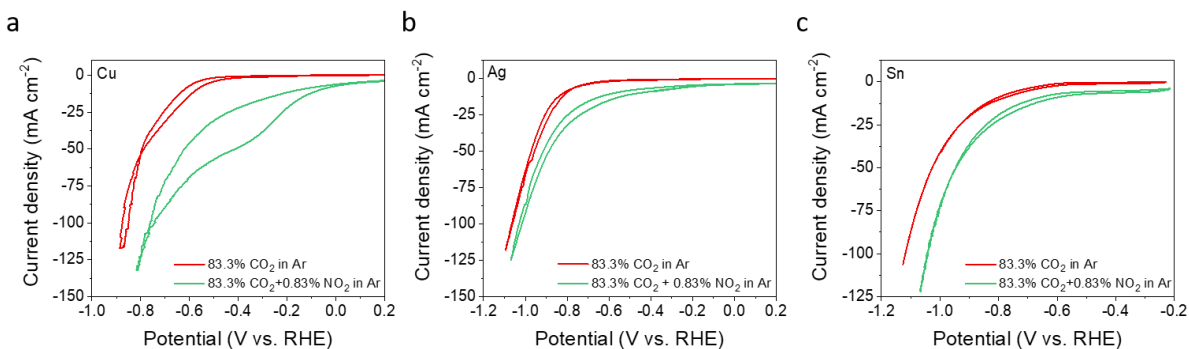

**Supplementary Figure 8.** Cyclic voltammograms on (a) Cu, (b) Ag, and (c) Sn catalysts in 1M  $\text{KHCO}_3$  under 83.3%  $\text{CO}_2$  and 16.7% Ar, and 83.3%  $\text{CO}_2$ , 15.87% Ar, and 0.83%  $\text{NO}_2$ . Scan rate:  $50 \text{ mV s}^{-1}$ . Onset potentials and cathodic currents shift to more positive potentials when 0.83%  $\text{NO}_2$  is introduced, suggesting that  $\text{NO}_2\text{RR}$  is more favorable than  $\text{CO}_2\text{RR}$  on all three catalysts.

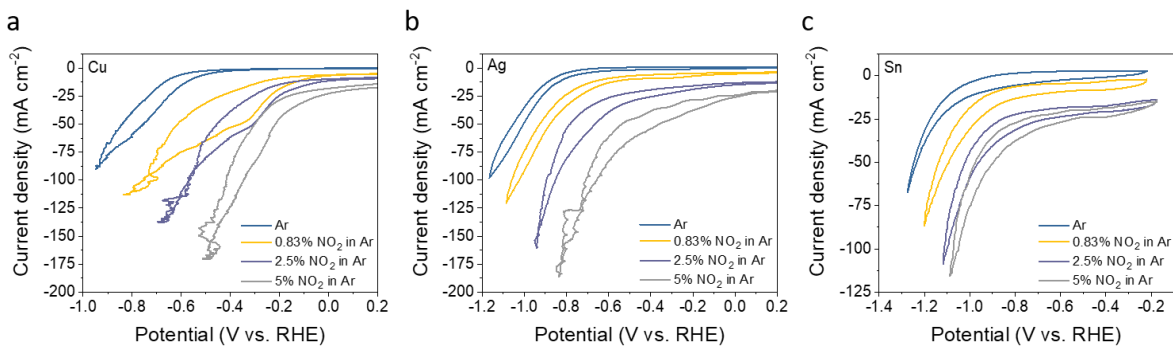

**Supplementary Figure 9.** Cyclic voltammograms on (a) Cu, (b) Ag, and (c) Sn catalysts in 1M KHCO<sub>3</sub> under different concentrations of NO<sub>2</sub> in Ar. Scan rate: 50 mV s<sup>-1</sup>. Onset potentials of NO<sub>2</sub>RR are more positive than CO<sub>2</sub>RR, and shifts in CV measurements suggest that NO<sub>2</sub>RR is mass transport limited.

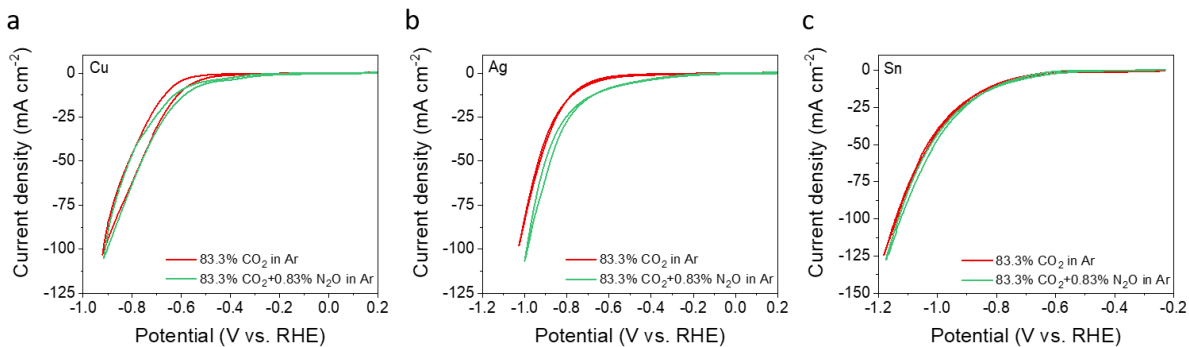

**Supplementary Figure 10.** Cyclic voltammograms on (a) Cu, (b) Ag, and (c) Sn catalysts in 1M KHCO<sub>3</sub> under 83.3% CO<sub>2</sub> and 16.7% Ar, and 83.3% CO<sub>2</sub>, 15.87% Ar, and 0.83% N<sub>2</sub>O. Scan rate: 50 mV s<sup>-1</sup>. Onset potentials and cathodic currents shift to more positive potentials when N<sub>2</sub>O is introduced on Cu and Ag catalysts, suggesting that N<sub>2</sub>ORR is more favorable than CO<sub>2</sub>RR on Cu and Ag catalysts. N<sub>2</sub>O has negligible effect on Sn catalyst.

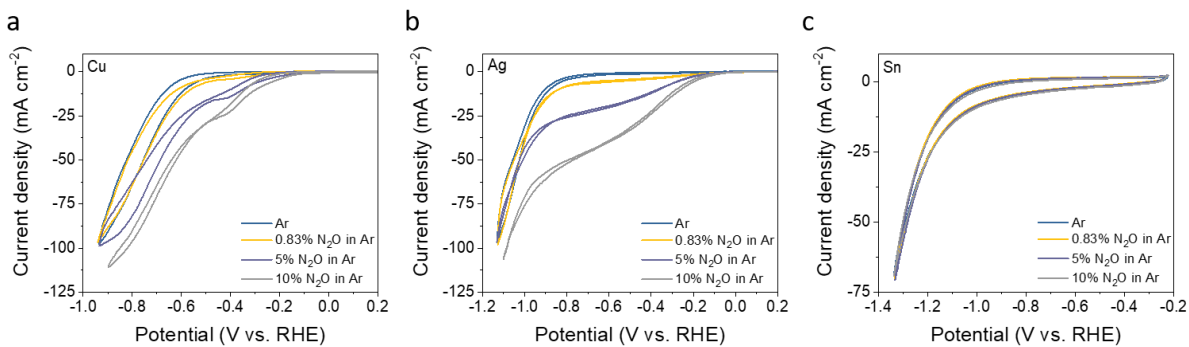

**Supplementary Figure 11.** Cyclic voltammograms on (a) Cu, (b) Ag, and (c) Sn catalysts in 1M KHCO<sub>3</sub> under different concentrations of N<sub>2</sub>O in Ar. Scan rate: 50 mV s<sup>-1</sup>. Onset potentials of N<sub>2</sub>ORR are more positive than CO<sub>2</sub>RR and shifts in CV measurements suggest that N<sub>2</sub>ORR is mass transport limited on Cu and Ag catalysts. N<sub>2</sub>O has negligible effect on Sn catalyst.



**Supplementary Table 13.** Loss in Faradaic efficiency during CO<sub>2</sub> electroreduction with the introduction of 0.83% NO, 0.83% NO<sub>2</sub>, and 0.83% N<sub>2</sub>O on Cu, Ag, and Sn catalysts.

| Impurity         | Cu (%) | Ag (%) | Sn (%) |
|------------------|--------|--------|--------|
| NO               | 33.9   | 29.6   | 27.9   |
| NO <sub>2</sub>  | 30.8   | 25.6   | 22.9   |
| N <sub>2</sub> O | 13.3   | 10.2   | 1.4    |

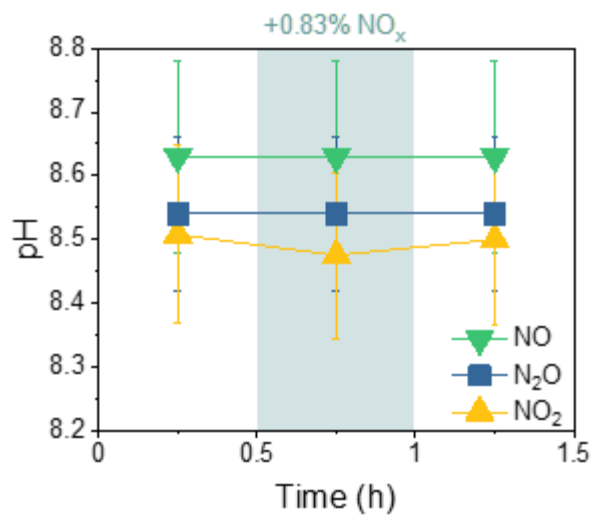

**Supplementary Figure 12.** pH measured at the outlet of the electrolyzer from a constant current  $100\text{-mA cm}^{-2}$  CO<sub>2</sub>RR experiment with the introduction of various NO<sub>x</sub>. pH of 1M KHCO<sub>3</sub> before entering the electrolyzer was  $7.8 \pm 0.1$ . Error bars represent the standard deviation of independent measurements from Cu, Ag, and Sn catalysts. The presence of NO and N<sub>2</sub>O has negligible effect in pH, while the presence of NO<sub>2</sub> slightly decreases the pH by 0.03.

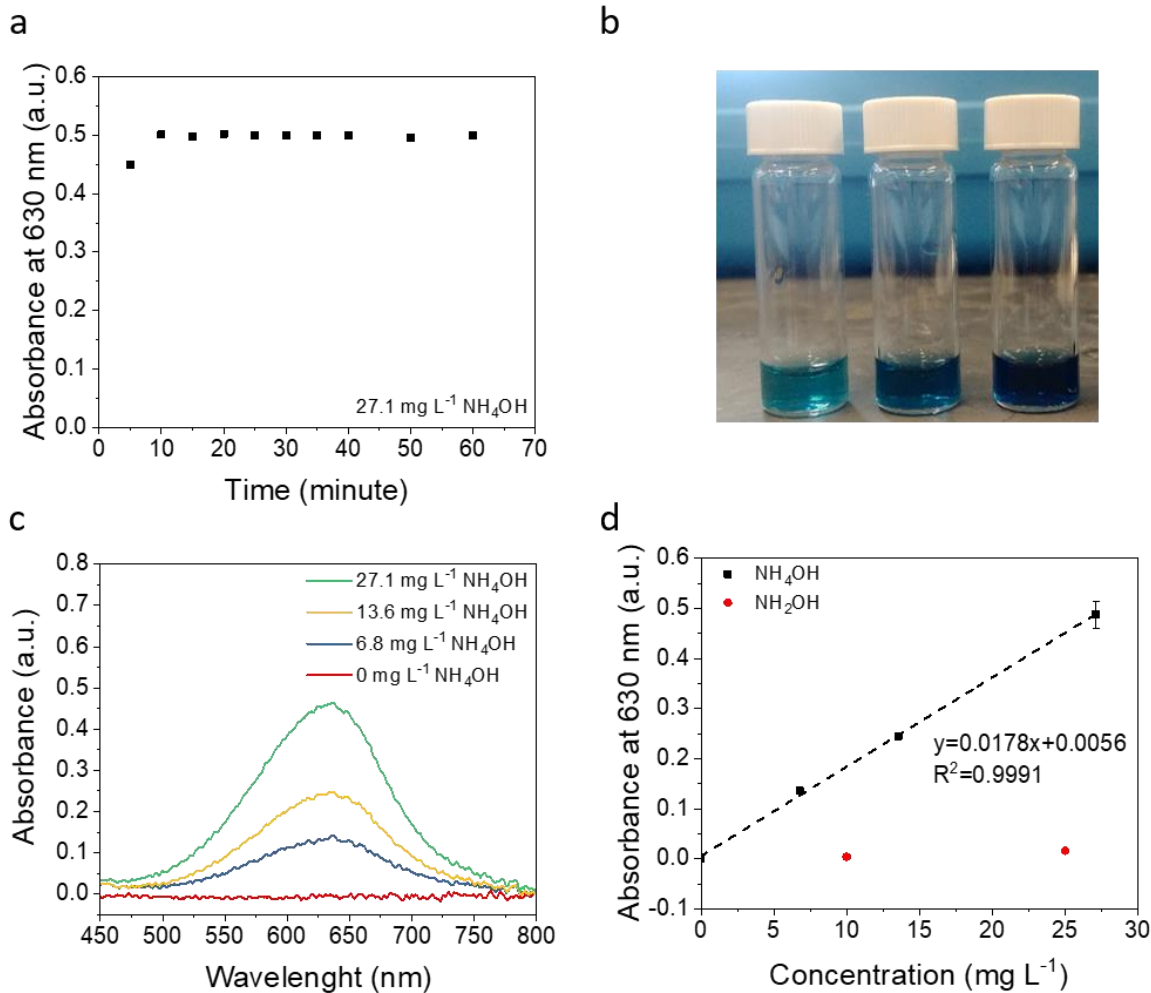

**Supplementary Figure 13.** Ammonia quantification using indophenol blue method. (a) Absorbance vs. time of 27.1 mg L<sup>-1</sup> NH<sub>4</sub>OH. Reaction is complete after 10 minutes. (b) Photograph of 6.8, 13.6, and 27.1 mg L<sup>-1</sup> NH<sub>4</sub>OH (from left to right) at 20 minutes. (c) Absorption spectra for different concentrations of NH<sub>4</sub>OH measured at 20 minutes. (d) Calibration curve for NH<sub>4</sub>OH. Absorbance was measured at 20 minutes. NH<sub>2</sub>OH has negligible interference. All solutions were prepared in 0.25M KHCO<sub>3</sub> to match the condition of the liquid products in the electrolyte.

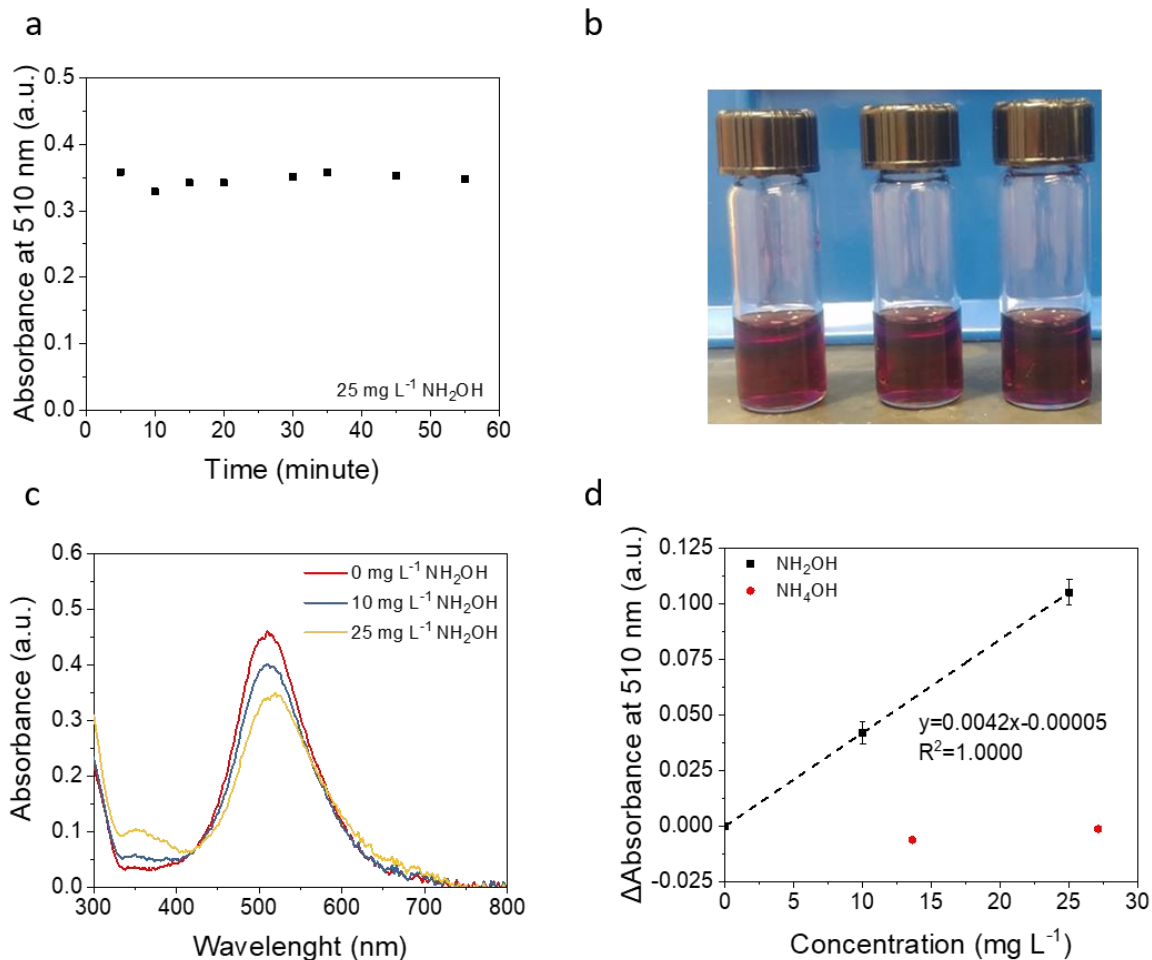

**Supplementary Figure 14.** Hydroxylamine quantification. (a) Absorbance vs. time of 25 mg L<sup>-1</sup> NH<sub>2</sub>OH. Reaction is complete after 10 minutes. (b) Photograph of 0, 10, and 25 mg L<sup>-1</sup> NH<sub>2</sub>OH (from left to right) at 20 minutes. (c) Absorption spectra for different concentrations of NH<sub>2</sub>OH measured at 20 minutes. (d) Calibration curve for NH<sub>2</sub>OH. Absorbance was measured at 20 minutes. Absorbance was subtracted from that of 0 mg L<sup>-1</sup> NH<sub>2</sub>OH. NH<sub>4</sub>OH has negligible interference. All solutions were prepared in 0.25M KHCO<sub>3</sub> to match the condition of the liquid products in the electrolyte.

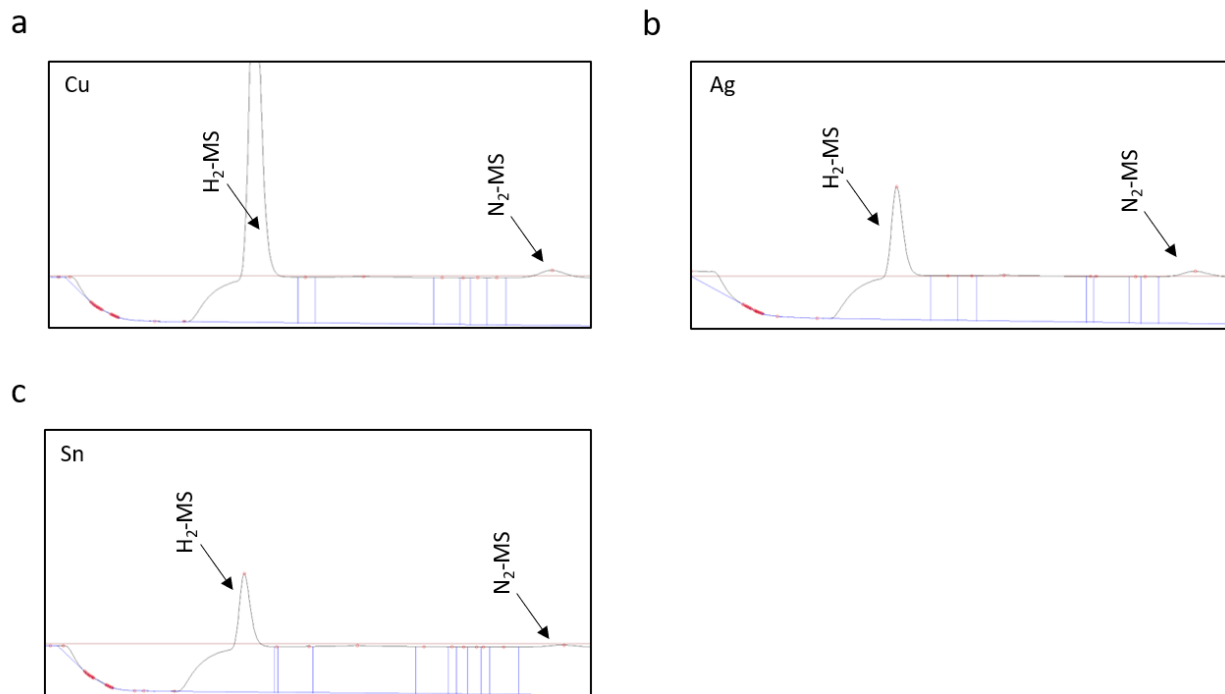

**Supplementary Figure 15.** Chromatogram of gas products from electrolysis in 83.3% CO<sub>2</sub>, 15.87% Ar, and 0.83% NO on (a) Cu, (b) Ag, and (c) Sn catalysts at 100 mA cm<sup>-2</sup>. TCD and Molecular sieve 5 A (MS) column are used, and 0 to 2.1 min is shown.

**Supplementary Table 14.** Faradaic efficiency of NO electroreduction products produced during electrolysis with 83.3% CO<sub>2</sub>, 15.87% Ar, and 0.83% NO on Cu, Ag, and Sn catalysts at a constant current density of 100 mA cm<sup>-2</sup> in 1 M KHCO<sub>3</sub> for 3 h. Concentration of N<sub>2</sub>O in the gas product stream was below the detection limit of GC, suggesting that N<sub>2</sub>O FE is below 2% on all three catalysts.

| Impurity           | Cu (%) | Ag (%) | Sn (%) |
|--------------------|--------|--------|--------|
| NH <sub>3</sub>    | 26.5   | 7.8    | 1.9    |
| NH <sub>2</sub> OH | -      | 11.6   | 13.7   |
| N <sub>2</sub>     | 4.4    | 2.7    | 0.9    |

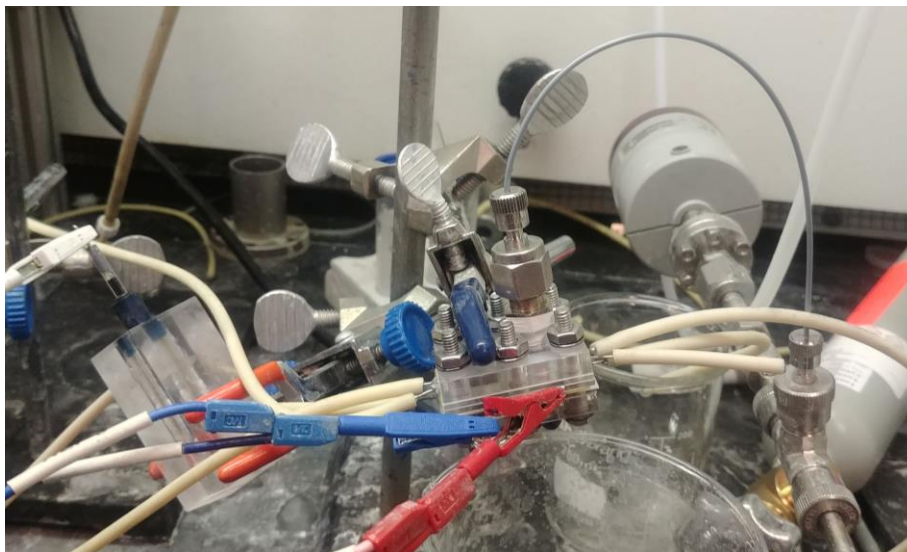

**Supplementary Figure 16.** Photograph of the FEMS setup.

### **Supplementary Note: Design of FEMS measurement**

To differentiate  $N_2$  ( $m/z=28, 14$ ) from  $N_2O$  ( $m/z=44, 30, 28, 14$ ), the signals associated with  $N_2O$  need to be determined from  $m/z=44$  or  $30$  signals. However, when the gas feed is  $83.3\% CO_2 + 0.83\% NO$  in Ar,  $m/z=44$  and  $30$  signals are dominated by  $CO_2$  and  $NO$ , respectively, making the determination of the relatively small  $N_2O$  signals unreliable. In addition,  $CO_2$  reduction products such as  $CO$ , methane, ethylene, and ethanol complicate the analysis of NORR products. As an alternative, FEMS experiment was conducted using  $0.83\% NO$  in Ar in the absence of  $CO_2$  to gain insight on the NORR products.



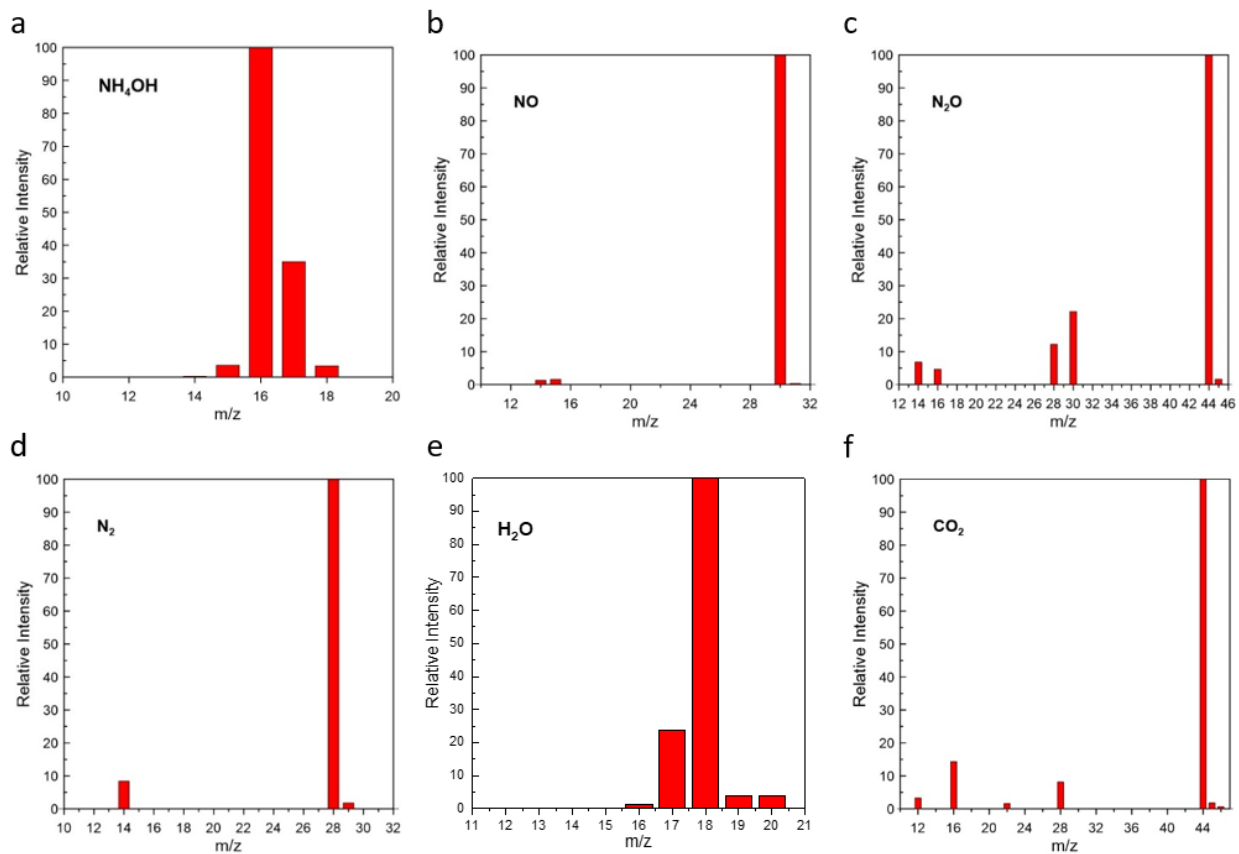

**Supplementary Figure 17.** Mass spectra of (a)  $\text{NH}_4\text{OH}$ , (b)  $\text{NO}$ , (c)  $\text{N}_2\text{O}$ , (d)  $\text{N}_2$ , (e)  $\text{H}_2\text{O}$ , and (f)  $\text{CO}_2$ . MS signals were deconvoluted using the following mass spectra.

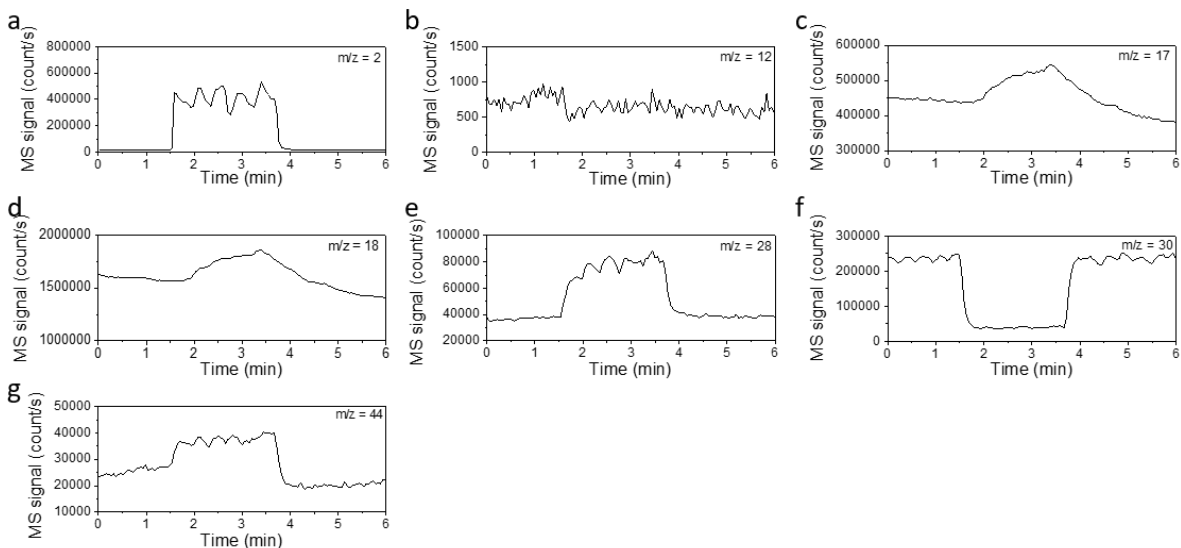

**Supplementary Figure 18.** MS signal vs. time obtained from FEMS on Cu in 1M  $\text{KHCO}_3$  with 0.83% NO in Ar before deconvolution for (a)  $m/z=2$ , (b)  $m/z=12$ , (c)  $m/z=17$ , (d)  $m/z=18$ , (e)  $m/z=28$ , (f)  $m/z=30$ , and (g)  $m/z=44$ .  $-0.90$  V vs. RHE was applied for approximately 2 minutes starting at  $t=1.5$  min.

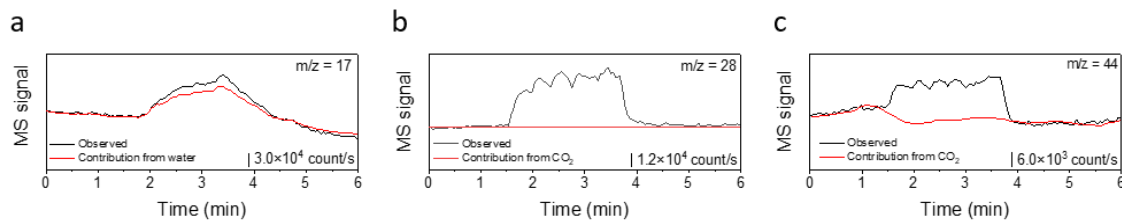

**Supplementary Figure 19.** MS signal vs. time obtained from FEMS on Cu in 1M KHCO<sub>3</sub> with 0.83% NO in Ar for (a) m/z=17 with contribution from water obtained from m/z=18, (b) m/z=28 with contribution from CO<sub>2</sub> in electrolyte obtained from m/z=12, and (c) m/z=44 with contribution from CO<sub>2</sub> in electrolyte obtained from m/z=12. m/z=12 has been smoothed. -0.90 V vs. RHE was applied for approximately 2 minutes starting at t=1.5 min. The differences are attributed to NORR products.

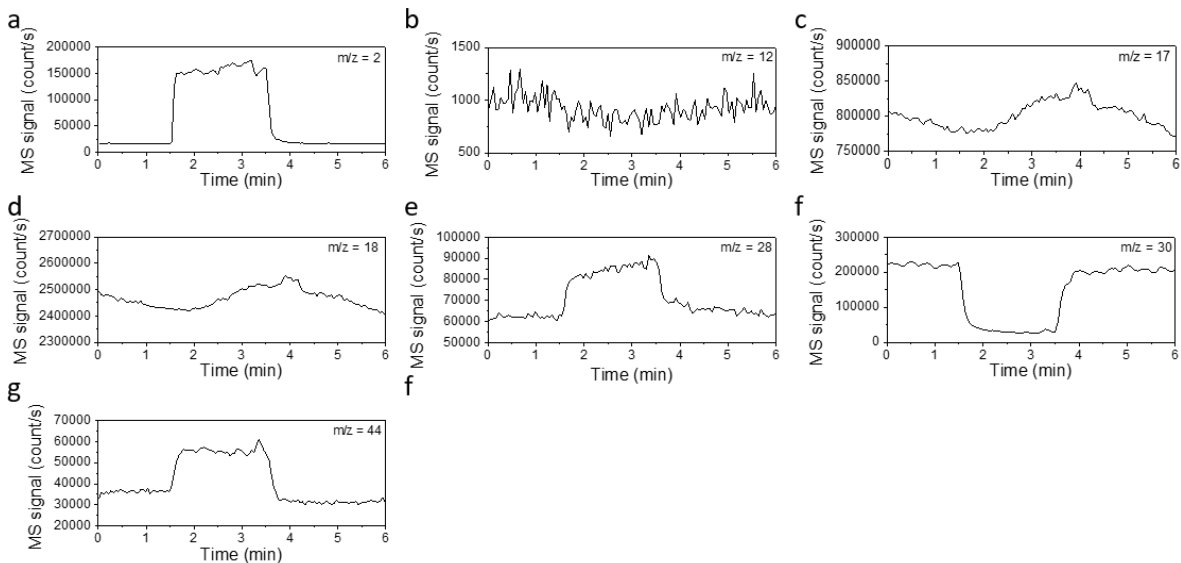

**Supplementary Figure 20.** MS signal vs. time obtained from FEMS on Ag in 1M  $\text{KHCO}_3$  with 0.83% NO in Ar before deconvolution for (a)  $m/z=2$ , (b)  $m/z=12$ , (c)  $m/z=17$ , (d)  $m/z=18$ , (e)  $m/z=28$ , (f)  $m/z=30$ , and (g)  $m/z=44$ .  $-1.00$  V vs. RHE was applied for approximately 2 minutes starting at  $t=1.5$  min.

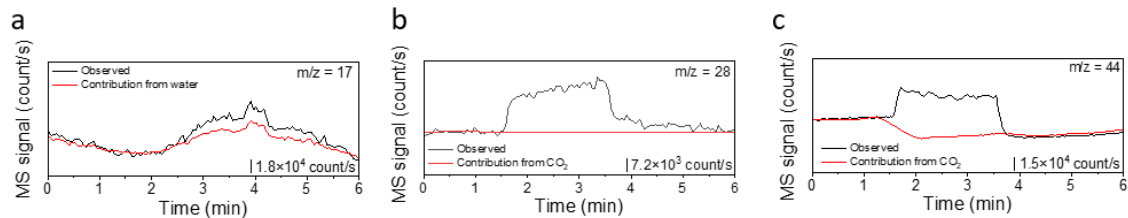

**Supplementary Figure 21.** MS signal vs. time obtained from FEMS on Ag in 1M  $\text{KHCO}_3$  with 0.83% NO in Ar for (a)  $m/z=17$  with contribution from water obtained from  $m/z=18$ , (b)  $m/z=28$  with contribution from  $\text{CO}_2$  in electrolyte obtained from  $m/z=12$ , and (c)  $m/z=44$  with contribution from  $\text{CO}_2$  in electrolyte obtained from  $m/z=12$ .  $m/z=12$  has been smoothed.  $-1.00$  V vs. RHE was applied for approximately 2 minutes starting at  $t=1.5$  min. The differences are attributed to NORR products.

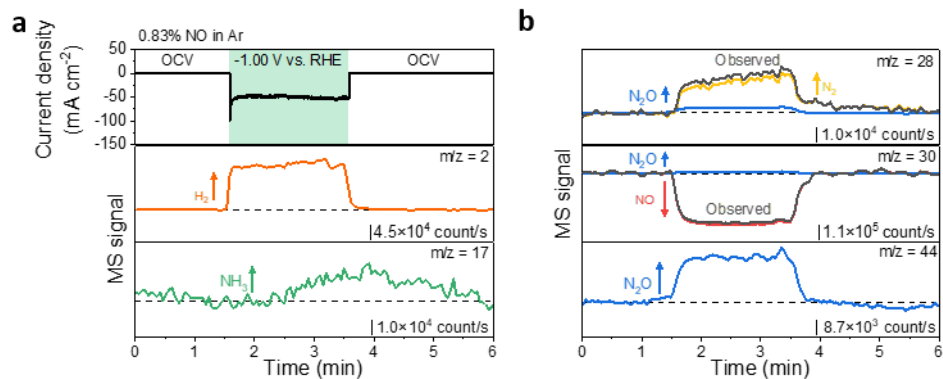

**Supplementary Figure 22.** (a) Measured current density vs. time, and deconvoluted MS signal vs. time for  $m/z=2$ ,  $m/z=17$ , (b)  $m/z=28$ ,  $m/z=30$ , and  $m/z=44$  from FEMS on Ag catalyst in 1M KHCO<sub>3</sub> with 0.83% NO in Ar. -1.00 V vs. RHE was applied for approximately 2 minutes starting at  $t=1.5$  min. NORR products have been deconvoluted using the mass spectra of individual products shown in Supplementary Fig. 17. Additional information is provided in the methods section and Supplementary Figs. 20 and 21.

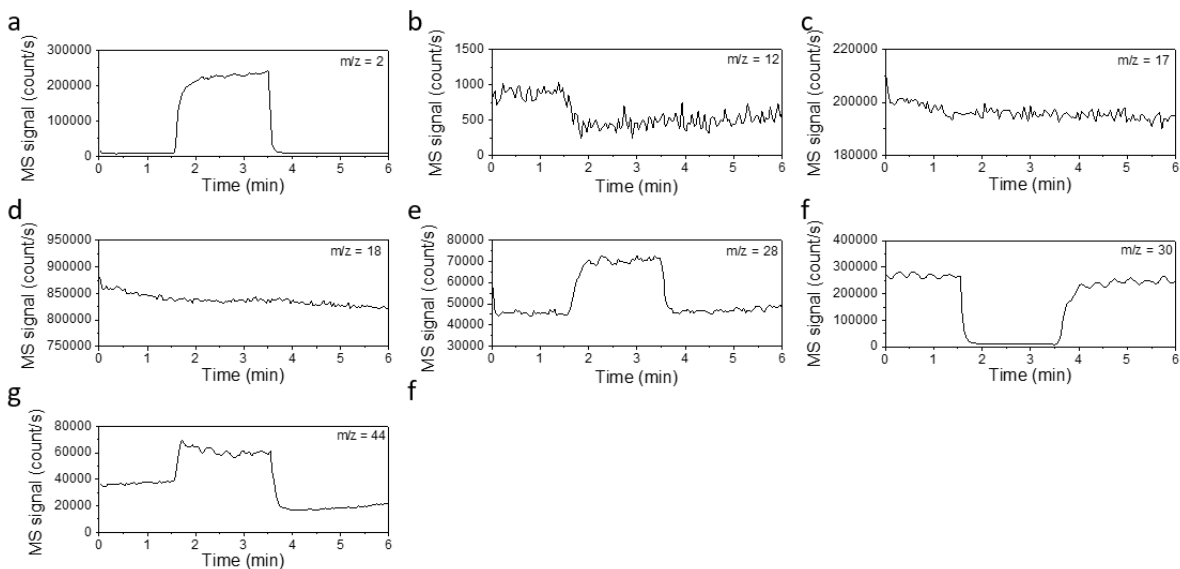

**Supplementary Figure 23.** MS signal vs. time obtained from FEMS on Sn in 1M KHCO<sub>3</sub> with 0.83% NO in Ar before deconvolution for (a) m/z=2, (b) m/z=12, (c) m/z=17, (d) m/z=18, (e) m/z=28, (f) m/z=30, and (g) m/z=44. -1.05 V vs. RHE was applied for approximately 2 minutes starting at t=1.5 min.

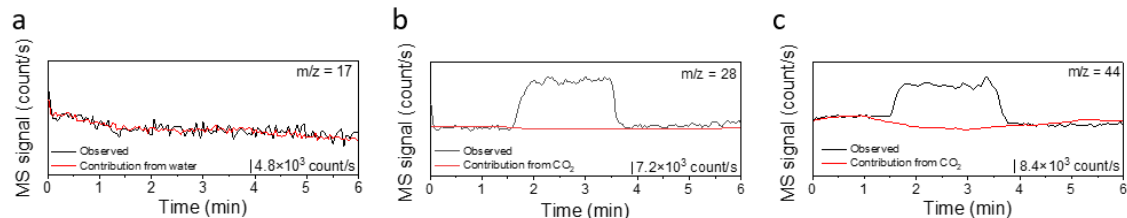

**Supplementary Figure 24.** MS signal vs. time obtained from FEMS on Sn in 1M KHCO<sub>3</sub> with 0.83% NO in Ar for (a) m/z=17 with contribution from water obtained from m/z=18, (b) m/z=28 with contribution from CO<sub>2</sub> in electrolyte obtained from m/z=12, and (c) m/z=44 with contribution from CO<sub>2</sub> in electrolyte obtained from m/z=12. m/z=12 has been smoothed. -1.05 V vs. RHE was applied for approximately 2 minutes starting at t=1.5 min. The differences are attributed to NORR products.



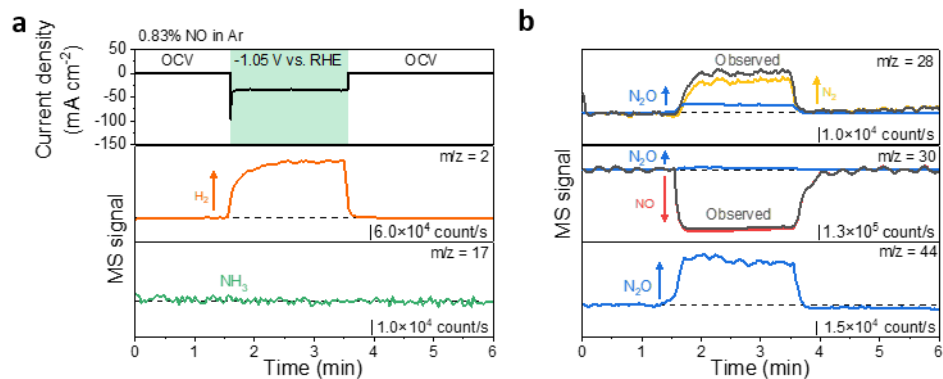

**Supplementary Figure 25.** (a) Measured current density vs. time, and deconvoluted MS signal vs. time for  $m/z=2$ ,  $m/z=17$ , (b)  $m/z=28$ ,  $m/z=30$ , and  $m/z=44$  from FEMS on Sn catalyst in 1M  $\text{KHCO}_3$  with 0.83% NO in Ar. -1.05 V vs. RHE was applied for approximately 2 minutes starting at  $t=1.5$  min. NORR products have been deconvoluted using the mass spectra of individual products shown in Supplementary Fig. 17. Additional information is provided in the methods section and Supplementary Figs. 23 and 24.

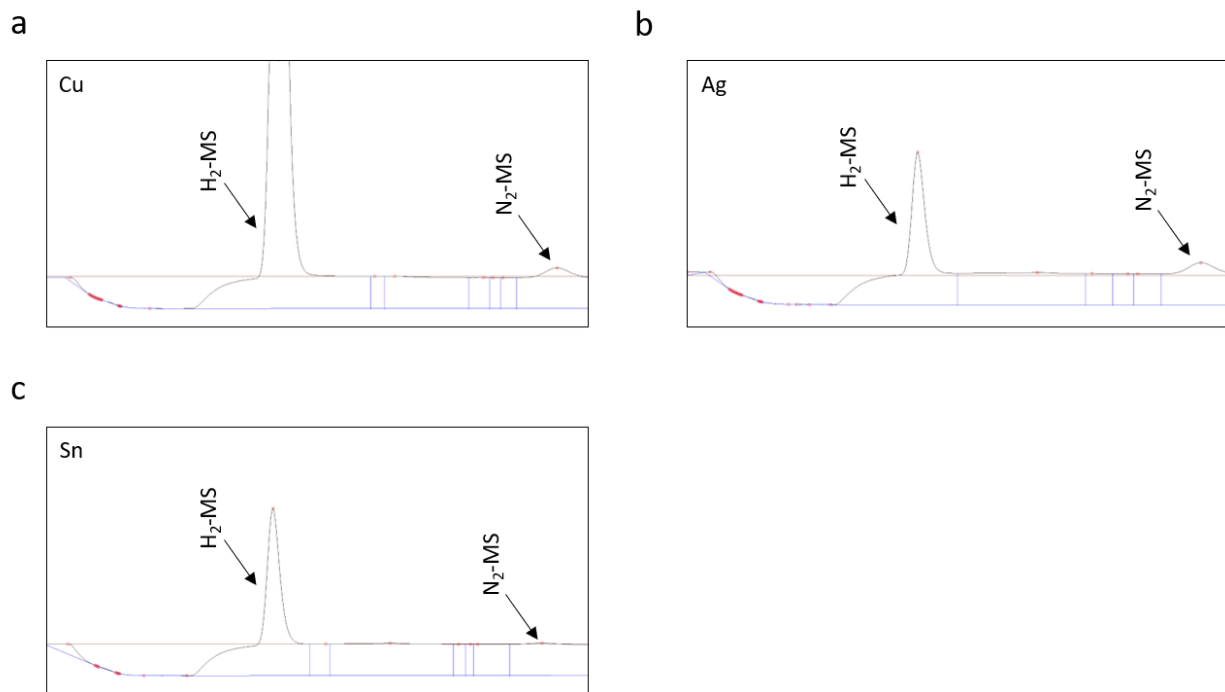

**Supplementary Figure 26.** Chromatogram of gas products from electrolysis in 83.3% CO<sub>2</sub>+0.83% N<sub>2</sub>O in Ar on (a) Cu, (b) Ag, and (c) Sn catalysts at 100 mA cm<sup>-2</sup>. TCD and Molecular sieve 5 A (MS) column were used, and 0 to 2 min is shown.

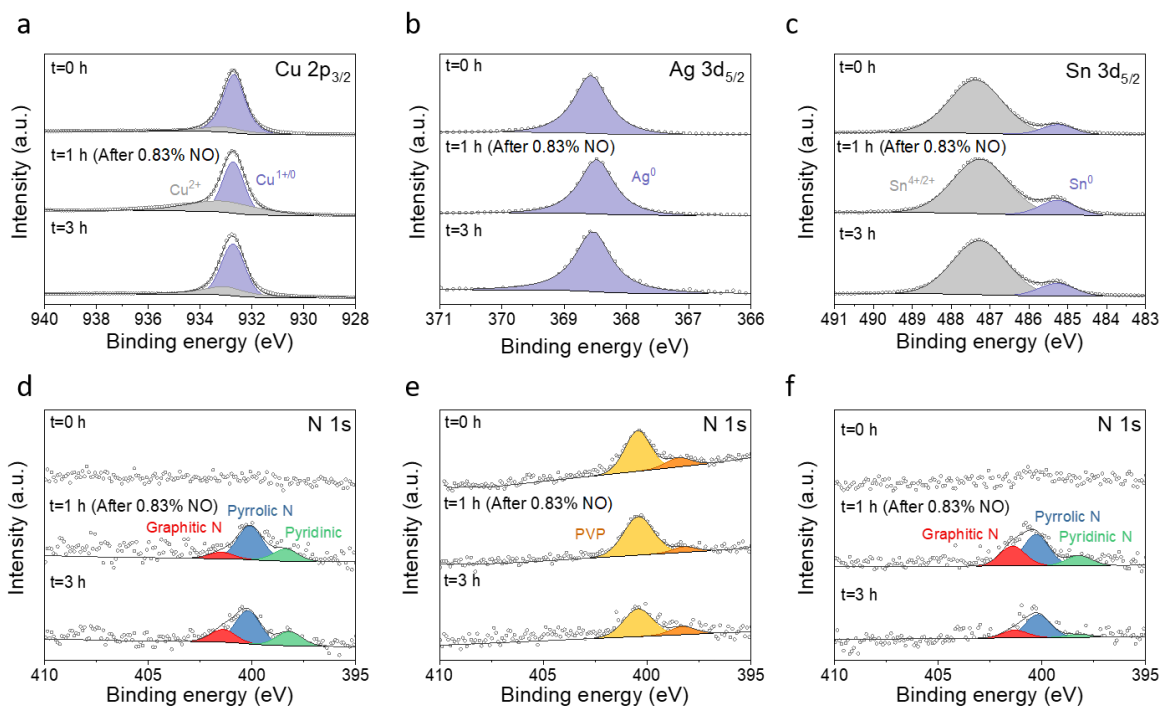

**Supplementary Figure 27.** XPS measurements of (a) Cu, (b) Ag, and (c) Sn electrodes before exposure to 0.83% NO (t=0 h), after exposure to 0.83% NO (t=1 h), and after 3 h electrolysis (t=3 h) from a 100 mA cm<sup>-2</sup> constant current CO<sub>2</sub>RR experiment with the introduction of 0.83% NO. Corresponding N 1s XPS measurements of (d) Cu, (e) Ag, and (f) Sn electrodes. Incorporation of N into GDL is observed on Cu and Sn electrodes. In the case of Ag electrode, the investigation of N incorporation is limited due to the presence of PVP surfactant. Corresponding details are provided in Supplementary Table 15.

**Supplementary Table 15.** XPS N 1s peak positions and surface nitrogen content (wt %) of Cu, Ag, and Sn samples obtained from a 100 mA cm<sup>-2</sup> constant current CO<sub>2</sub>RR experiment with the introduction of 0.83% NO. Sample time refers to the time at which the electrode was taken out of the electrolyzer. N content has been calculated using the following equation: N content (%) =  $\frac{\Sigma N (wt \%)}{\Sigma N (wt \%)+metal (wt \%)} \times 100$ , where  $\Sigma N (wt \%) = \text{graphitic N (wt \%)} + \text{pyrrolic N (wt \%)} + \text{pyridinic N (wt \%)} + \text{PVP (wt\%)}$ , and metal = Cu, Ag, or Sn.

|    | Sample time (h) | Graphitic (eV) | Pyrrolic (eV) | Pyridinic (eV) | PVP (eV)     | Total N content (wt %) |
|----|-----------------|----------------|---------------|----------------|--------------|------------------------|
| Cu | 1               | 401.5          | 400.2         | 398.4          | -            | 1.48                   |
|    | 3               | 401.4          | 400.2         | 398.2          | -            | 1.12                   |
| Ag | 0               | -              | -             | -              | 400.5, 398.5 | 2.72                   |
|    | 1               | -              | -             | -              | 400.4, 398.5 | 2.92                   |
|    | 3               | -              | -             | -              | 400.4, 398.3 | 2.40                   |
| Sn | 1               | 401.4          | 400.3         | 398.2          | -            | 1.03                   |
|    | 3               | 401.3          | 400.2         | 398.1          | -            | 0.64                   |

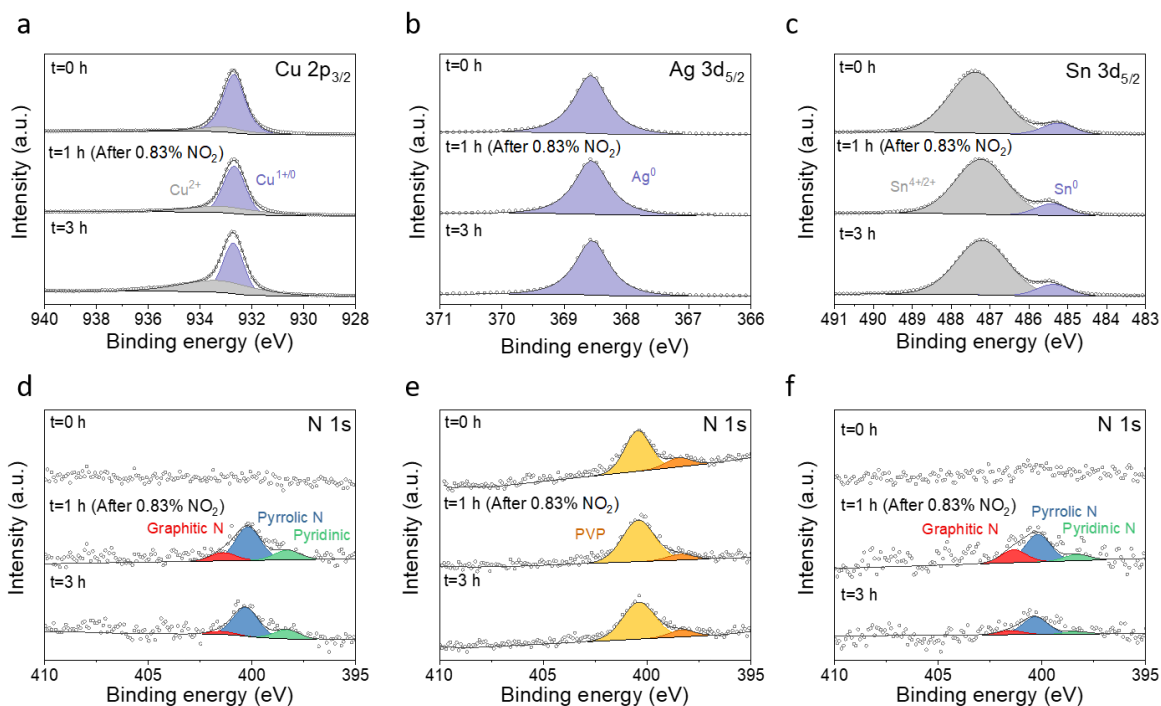

**Supplementary Figure 28.** XPS measurements of (a) Cu, (b) Ag, and (c) Sn electrodes before exposure to 0.83% NO<sub>2</sub> (t=0 h), after exposure to 0.83% NO<sub>2</sub> (t=1 h), and after 3 h electrolysis (t=3 h) from a 100 mA cm<sup>-2</sup> constant current CO<sub>2</sub>RR experiment with the introduction of 0.83% NO<sub>2</sub>. Corresponding N 1s XPS measurements of (d) Cu, (e) Ag, and (f) Sn electrodes. Incorporation of N into GDL is observed on Cu and Sn electrodes. In the case of Ag electrode, the investigation of N incorporation is limited due to the presence of PVP surfactant. Corresponding details are provided in Supplementary Table 16.

**Supplementary Table 16.** XPS N 1s peak positions and surface nitrogen content (wt %) of Cu, Ag, and Sn samples obtained from a 100 mA cm<sup>-2</sup> constant current CO<sub>2</sub>RR experiment with the introduction of 0.83% NO<sub>2</sub>. Sample time refers to the time at which the electrode was taken out of the electrolyzer. N content has been calculated using the following equation: N content =  $\frac{\Sigma N \text{ (wt \%)}}{\Sigma N \text{ (wt \%)} + \text{metal (wt \%)}} \times 100$ , where  $\Sigma N$  (wt %) = graphitic N (wt %) + pyrrolic N (wt %) + pyridinic N (wt%) or PVP (wt%), and metal = Cu, Ag, or Sn.

|    | Sample time (h) | Graphitic (eV) | Pyrrolic (eV) | Pyridinic (eV) | PVP (eV)     | Total N content (wt %) |
|----|-----------------|----------------|---------------|----------------|--------------|------------------------|
| Cu | 1               | 401.4          | 400.2         | 398.3          | -            | 0.97                   |
|    | 3               | 401.4          | 400.3         | 398.2          | -            | 1.26                   |
| Ag | 0               | -              | -             | -              | 400.5, 398.5 | 2.72                   |
|    | 1               | -              | -             | -              | 400.4, 398.4 | 3.63                   |
|    | 3               | -              | -             | -              | 400.4, 398.3 | 3.22                   |
| Sn | 1               | 401.4          | 400.2         | 398.2          | -            | 2.25                   |
|    | 3               | 401.2          | 400.3         | 398.2          | -            | 1.47                   |

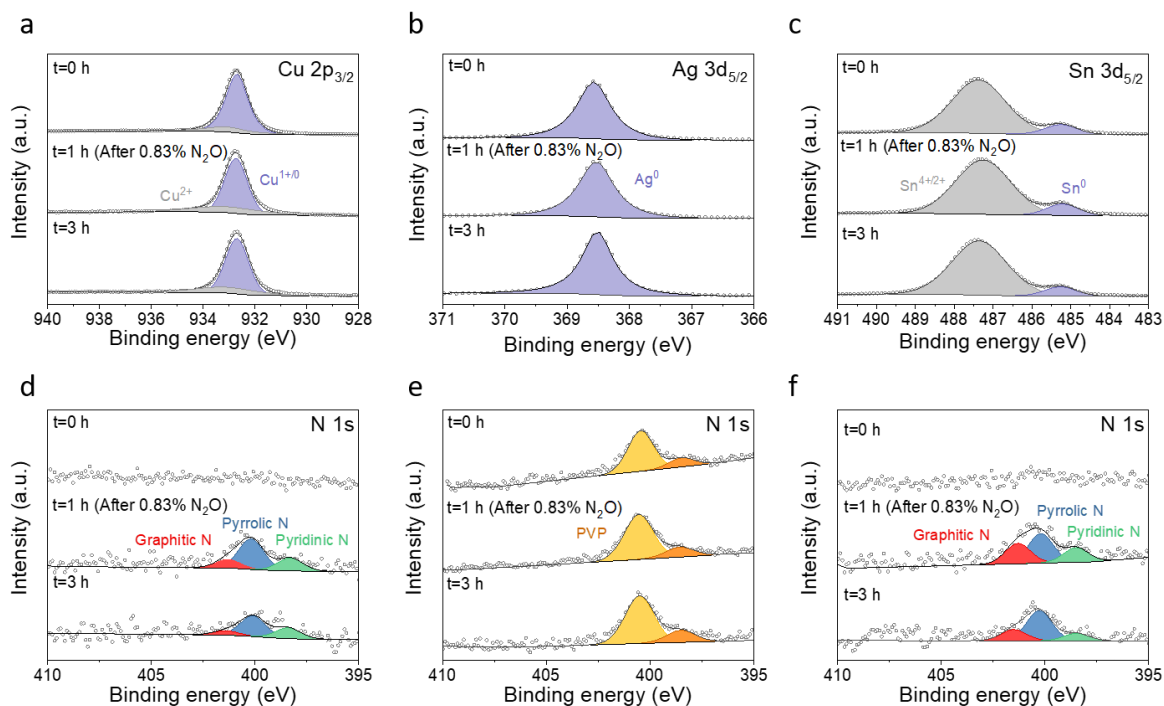

**Supplementary Figure 29.** XPS measurements of (a) Cu, (b) Ag, and (c) Sn electrodes before exposure to 0.83% N<sub>2</sub>O (t=0 h), after exposure to 0.83% N<sub>2</sub>O (t=1 h), and after 3 h electrolysis (t=3 h) from a 100 mA cm<sup>-2</sup> constant current CO<sub>2</sub>RR experiment with the introduction of 0.83% N<sub>2</sub>O. Corresponding N 1s XPS measurements of (d) Cu, (e) Ag, and (f) Sn electrodes. Incorporation of N into GDL is observed on Cu and Sn electrodes. In the case of Ag electrode, the investigation of N incorporation is limited due to the presence of PVP surfactant. Corresponding details are provided in Supplementary Table 17.

**Supplementary Table 17.** XPS N 1s peak positions and surface nitrogen content (wt %) of Cu, Ag, and Sn samples obtained from a 100 mA cm<sup>-2</sup> constant current CO<sub>2</sub>RR experiment with the introduction of 0.83% N<sub>2</sub>O. Sample time refers to the time at which the electrode was taken out of the electrolyzer. N content has been calculated using the following equation: N content =  $\frac{\Sigma N (wt \%)}{\Sigma N (wt \%) + metal (wt \%)} \times 100$ , where  $\Sigma N (wt \%) = \text{graphitic N (wt \%)} + \text{pyrrolic N (wt \%)} + \text{pyridinic N (wt \%)} + \text{PVP (wt\%)}$ , and metal = Cu, Ag, or Sn.

|    | Sample time (h) | Graphitic (eV) | Pyrrolic (eV) | Pyridinic (eV) | PVP (eV)     | Total N content (wt %) |
|----|-----------------|----------------|---------------|----------------|--------------|------------------------|
| Cu | 1               | 401.4          | 400.1         | 398.4          | -            | 1.28                   |
|    | 3               | 401.3          | 400.2         | 398.3          | -            | 0.89                   |
| Ag | 0               | -              | -             | -              | 400.5, 398.5 | 2.72                   |
|    | 1               | -              | -             | -              | 400.6, 398.6 | 2.39                   |
|    | 3               | -              | -             | -              | 400.5, 398.5 | 1.88                   |
| Sn | 1               | 401.3          | 400.2         | 398.5          | -            | 1.02                   |
|    | 3               | 401.4          | 400.2         | 398.4          | -            | 1.46                   |



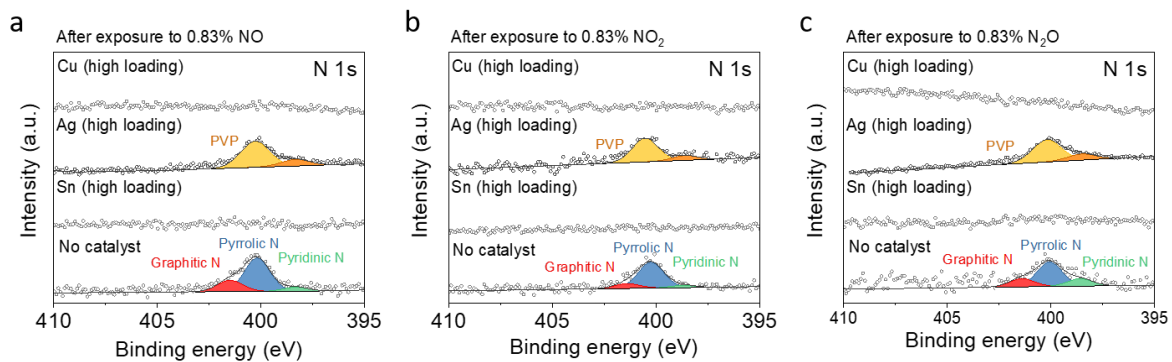

**Supplementary Figure 30.** XPS measurements of electrodes with high catalyst loadings of 2.0 mg cm<sup>-2</sup> Cu, Ag, and Sn, and no catalyst at t=1 h after exposure to (a) 0.83% NO, (b) 0.83% NO<sub>2</sub>, and (c) 0.83% N<sub>2</sub>O for 0.5 h during CO<sub>2</sub> electrolysis. The results confirm that N is incorporated in GDL rather than metal catalysts.

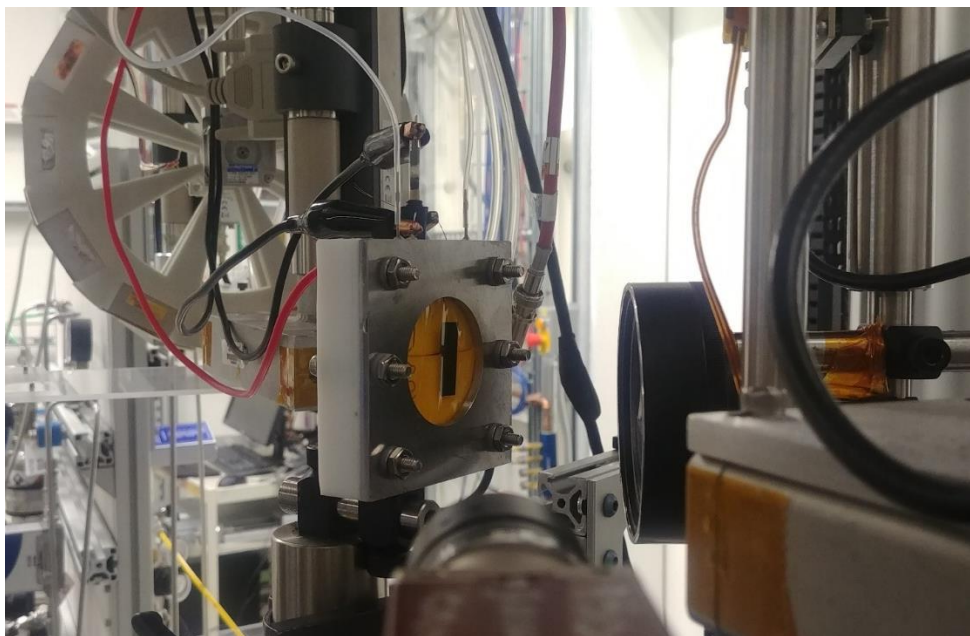

**Supplementary Figure 31.** Photograph of electrochemical batch cell for XAS operando experiments.

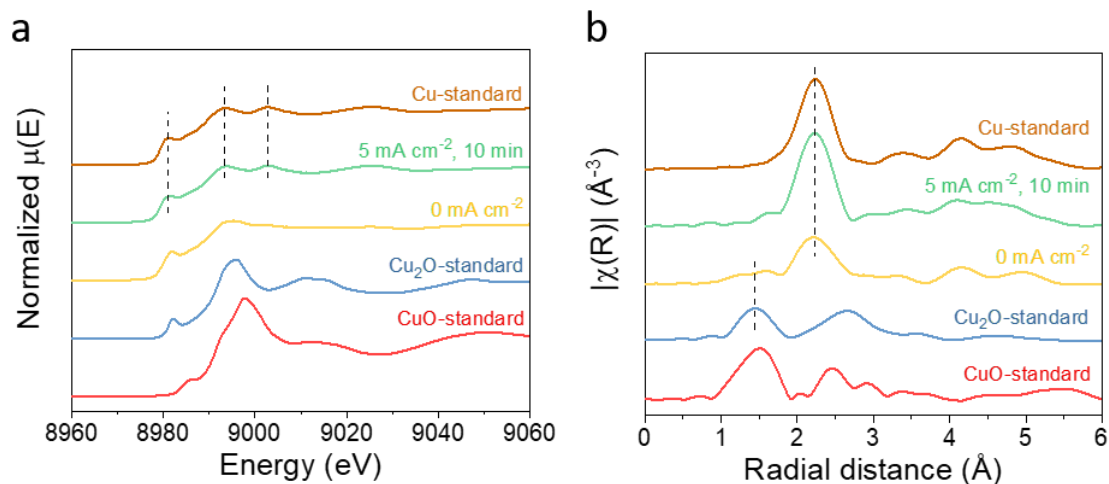

**Supplementary Figure 32.** Cu K-edge (a) XANES and (f) EXAFS of Cu catalyst obtained after exposure to 0.23% NO<sub>2</sub> for 0.5 h. 0.23% was used instead of 0.83% due to the availability of the gas at the time of the experiment. Nonetheless, insight on the effect of the introduction of NO<sub>2</sub> during CO<sub>2</sub>RR on the catalyst oxidation state is still obtained. Cu catalyst is quickly reduced to metallic Cu once current is applied, suggesting that Cu catalyst remains or revert to fully metallic under reaction conditions after NO<sub>2</sub> is removed from the CO<sub>2</sub> stream

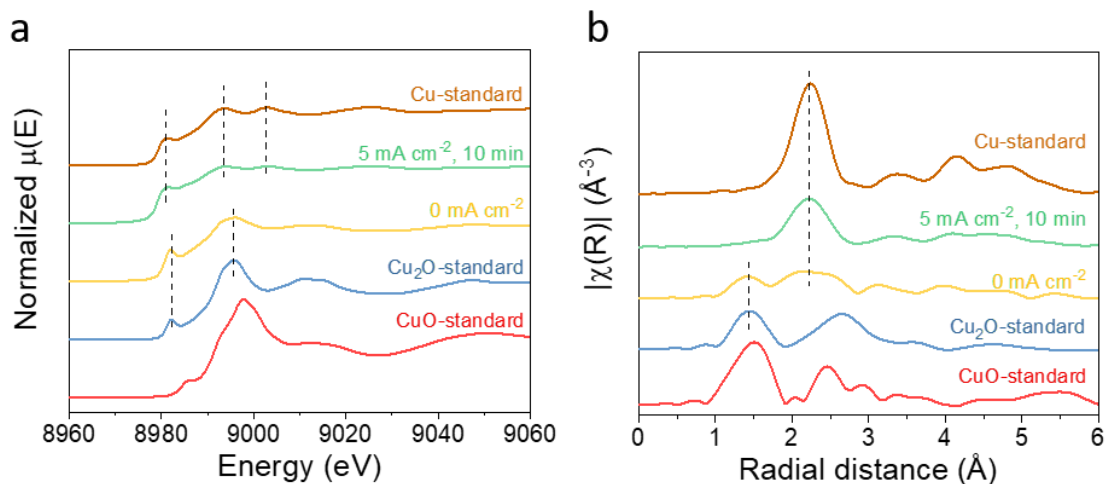

**Supplementary Figure 33.** Cu K-edge (a) XANES and (f) EXAFS of Cu catalyst obtained after exposure to 0.83% N<sub>2</sub>O for 0.5 h. Cu catalyst is quickly reduced to metallic Cu once current is applied, suggesting that Cu catalyst remains or revert to fully metallic under reaction conditions after N<sub>2</sub>O is removed from the CO<sub>2</sub> stream

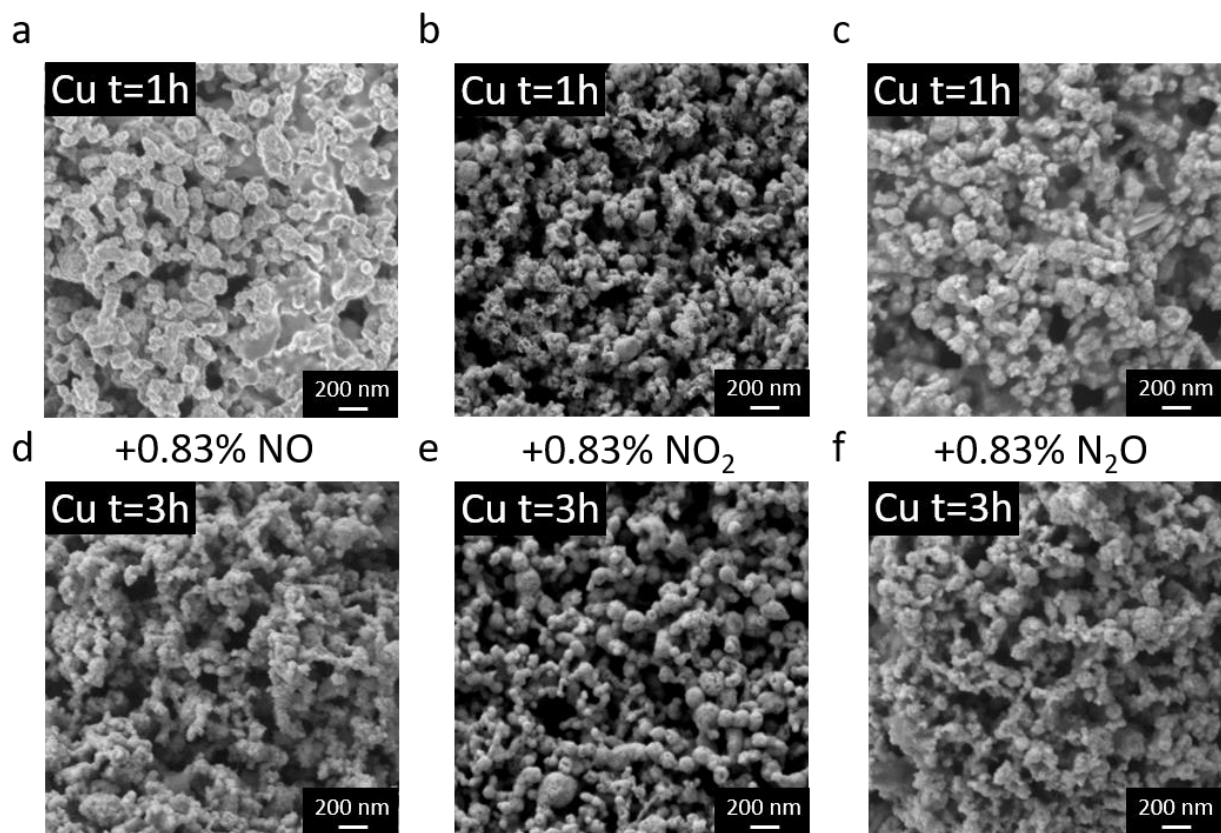

**Supplementary Figure 34.** SEM images of Cu electrodes obtained at (a) t=1 h and (d) t=3 h after exposure to 0.83% NO, (b) t=1 h and (e) t=3 h after exposure to 0.83% NO<sub>2</sub>, and (c) t=1 h and (f) t=3 h after exposure to 0.83% N<sub>2</sub>O during CO<sub>2</sub> electrolysis. Change in Cu catalyst obtained at t=1 and 3 h compared to that obtained at t=0 h (Supplementary Fig. 1) is negligible.

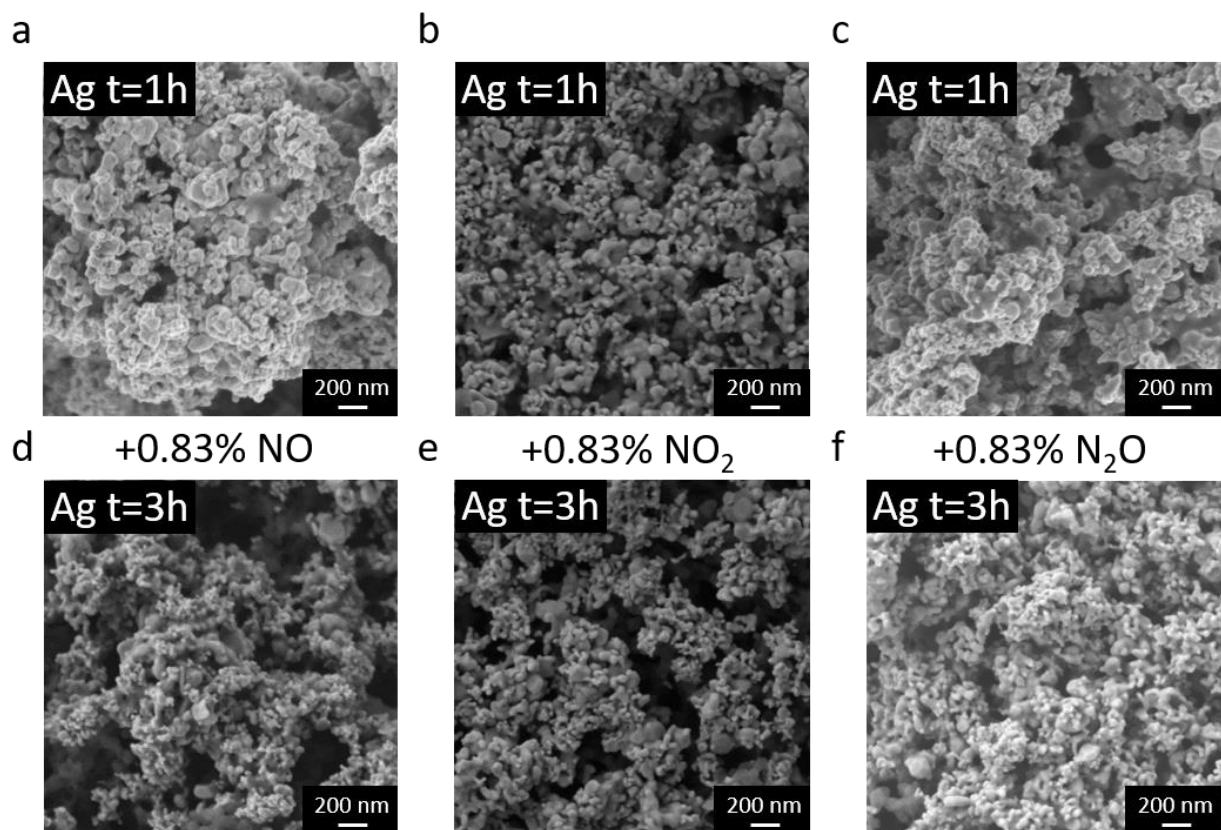

**Supplementary Figure 35.** SEM images of Ag electrodes obtained at (a) t=1 h and (d) t=3 h after exposure to 0.83% NO, (b) t=1 h and (e) t=3 h after exposure to 0.83% NO<sub>2</sub>, and (c) t=1 h and (f) t=3 h after exposure to 0.83% N<sub>2</sub>O during CO<sub>2</sub> electrolysis. Change in Ag catalyst obtained at t=1 and 3 h compared to that obtained at t=0 h (Supplementary Fig. 1) is negligible.

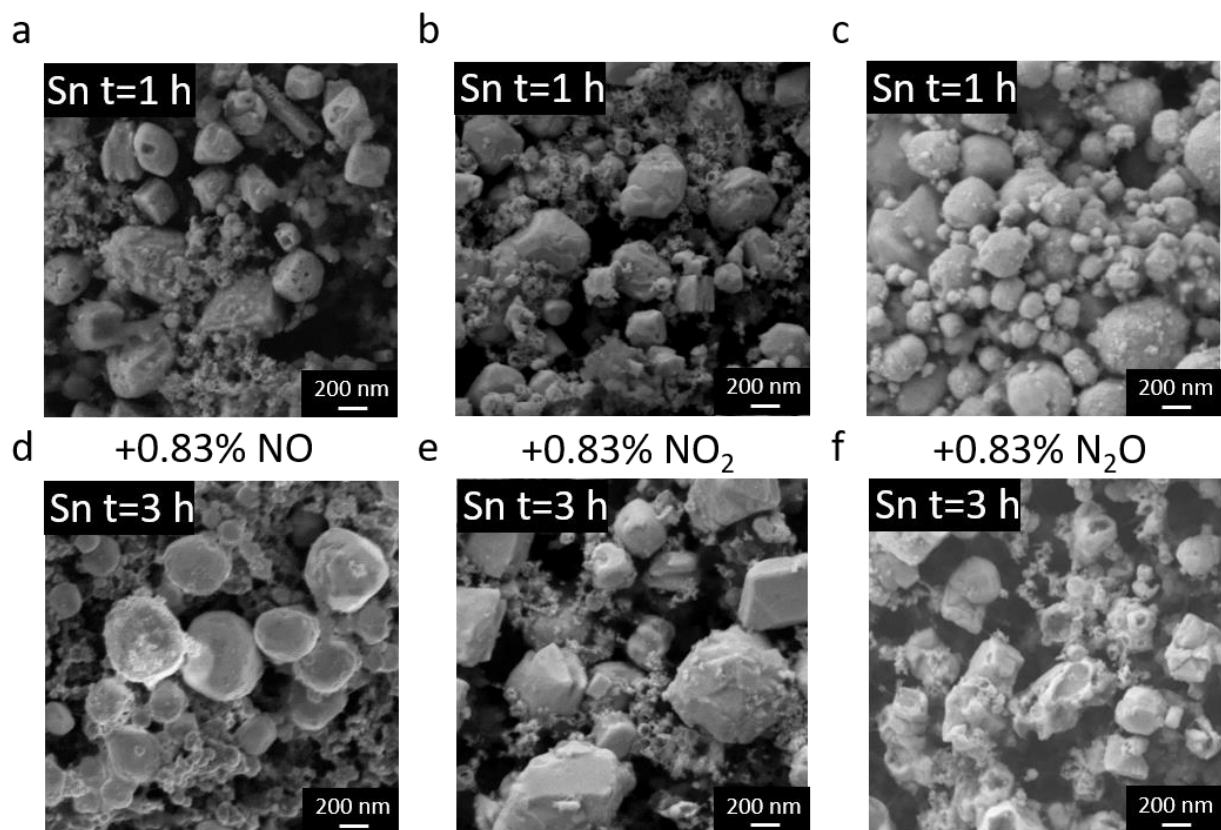

**Supplementary Figure 36.** SEM images of Sn electrodes obtained at (a) t=1 h and (d) t=3 h after exposure to 0.83% NO, (b) t=1 h and (e) t=3 h after exposure to 0.83% NO<sub>2</sub>, and (c) t=1 h and (f) t=3 h after exposure to 0.83% N<sub>2</sub>O during CO<sub>2</sub> electrolysis. The particle size for Sn catalyst obtained at t=1 and 3 h increased noticeably compared to that obtained at t=0 h (Supplementary Fig. 1)

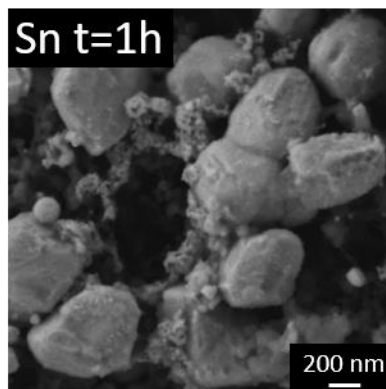

**Supplementary Figure 37.** SEM image of Sn electrode obtained at t=1 h after CO<sub>2</sub>RR without NO<sub>x</sub> impurity. Because the particle size increased after CO<sub>2</sub>RR without NO<sub>x</sub> impurity, NO<sub>x</sub> impurities are unlikely the cause of the size change.



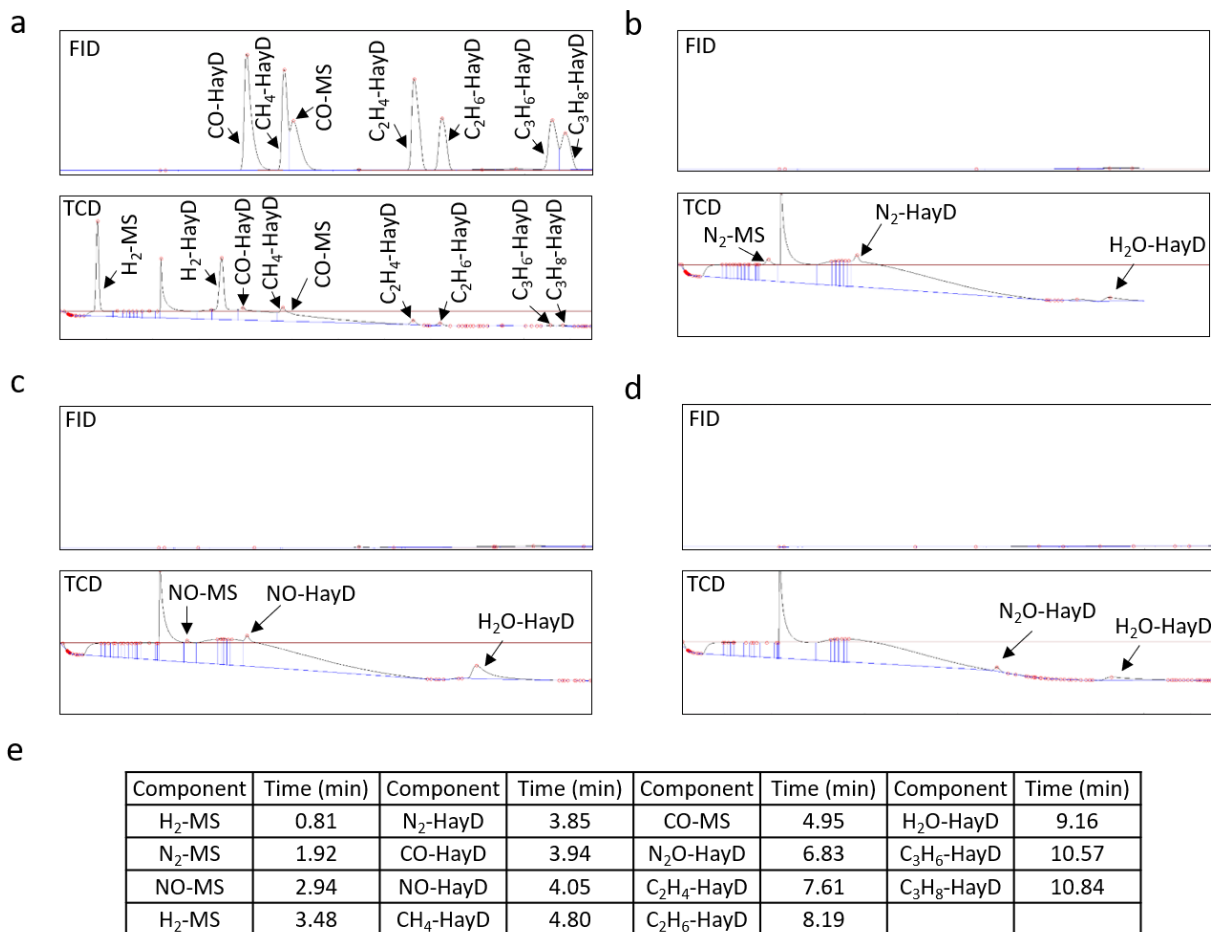

**Supplementary Figure 38.** Chromatogram of (a) 2% H<sub>2</sub>, 1% CO, 1% CH<sub>4</sub>, 1% C<sub>2</sub>H<sub>4</sub>, 0.50% C<sub>2</sub>H<sub>6</sub>, 0.25% C<sub>3</sub>H<sub>6</sub>, 0.25% C<sub>3</sub>H<sub>8</sub> in Ar, (b) 1% N<sub>2</sub> in Ar, (c) 1% NO in Ar, and (d) 1% N<sub>2</sub>O in Ar. Top and bottom are measured by FID and TCD, respectively. (e) Retention time of different components in TCD during GC analysis. Molecular sieve 5 A (MS) and Haysep D (HayD) columns are used for separation of gases.

### Supplementary References

1. Rosca, V., Duca, M., DeGroot, M. T. & Koper, M. T. M. Nitrogen Cycle Electrocatalysis. *Chem. Rev.* **109**, 2209–2244 (2009).
2. Bratsch, S. G. Standard Electrode Potentials and Temperature Coefficients in Water at 298.15 K. *J. Phys. Chem. Ref. Data* **18**, 1–21 (1989).
3. Jouny, M., Luc, W. & Jiao, F. General Techno-Economic Analysis of CO<sub>2</sub> Electrolysis Systems. *Ind. Eng. Chem. Res.* **57**, 2165–2177 (2018).
