# Supplementary material for: The impact of nitrogen oxides on electrochemical carbon dioxide reduction
Source: PubMed Central journal article supplement (PMC7672067; doi:10.1038/s41467-020-19731-8), 2020-11-17
Supplement: 41467_2020_19731_MOESM2_ESM.pdf [file 41467_2020_19731_MOESM2_ESM.pdf]

Reviewer #1 (Remarks to the Author):

In this work, Byung Hee Ko et al. investigate the role of nitrogen oxides (NO<sub>x</sub>) on the selectivity and cell voltage of a carbon dioxide reduction cell. The impacts of 3 gas impurities (NO, NO<sub>2</sub>, and N<sub>2</sub>O) in the CO<sub>2</sub> stream are measured independently. Three model catalysts (Cu, Ag, and Sn) are used to evaluate the performance changes for each metal. The authors show a reduction in selectivity towards CO<sub>2</sub>R products and the increase of N<sub>2</sub>O, N<sub>2</sub>, and NH<sub>3</sub> electroproduction. These nitrogen-containing products are quantified by flow electrochemical mass spectrometry. After the impurities are removed, the selectivity towards CO<sub>2</sub>R is re-established. The metal catalysts are determined to contain no traces of nitrogen using XPS, operando XANES, and EXAFS.

Comments:

1. Linking to past findings. Remove the sentence from the introduction "Understanding the behavior of the NO<sub>x</sub> impurities in CO<sub>2</sub>R is of great importance for practical CO<sub>2</sub> electrolysis devices, but it has not been explored yet." Replace it with a more fulsome discussion of past work and key findings including the details of your reference 18, Zhai et al. ECS Transactions (2009), and Komatsu et al. [Preparation of Cu-solid polymer electrolyte composite electrodes and application to gas-phase electrochemical reduction of CO<sub>2</sub>, *Electrochimica Acta* (1995)], and other relevant studies citing those. Frame the contribution here more clearly in that context.
2. Conduct further analyses of mass transporting limiting partial current towards NO<sub>x</sub>R as a function of gas flow rate. How much of the NO<sub>x</sub> is reduced and how much is left unreacted? Is the loss of current towards CO<sub>2</sub>R products disastrous even at low gas flow rates? This analysis need not be complex. For instance, a simple calculation could show the amount of current lost to NO<sub>x</sub>R if all of the NO<sub>x</sub> that enters the cell is reduced. I would encourage more thinking and analysis along these lines, and some contextualization of the scale of this loss for typical systems and typical impurity containing streams.
3. Discuss the effect of NO<sub>2</sub> on HER. Tables S5, S6, and S7 show that the HER is eliminated for all catalysts in the presence of NO<sub>2</sub>. It would be very interesting to mechanistically understand this phenomenon and whether it can be applied to reduce HER in typical CO<sub>2</sub>R systems. Moreover, how does the cost of NO<sub>x</sub>R (see 2 above) change if an offsetting benefit of HER suppression is achieved, or could be achieved. The mechanism here – although not the main focus of the paper – is intriguing and worthy of discussion.
4. Why does the addition of the NO<sub>x</sub> have a negligible influence on the cell voltage during the constant current experiments? This disagrees with the CVs, which show a large influence on the cell voltage, especially when 0.3% NO<sub>2</sub> is added.
5. What are the implications of N-C bonds in the GDL from your XPS investigation? If there are no implications, consider removing some of the panels of Figure 5.
6. Include additional discussion on strategies to avoid the detrimental effects of the lost current towards CO<sub>2</sub>R (or whether the value of the ammonia, including separation offsets the decreased CO<sub>2</sub>R selectivity).

Overall, this work builds on previous studies on the impact of NO<sub>x</sub> impurities contained within CO<sub>2</sub> feedstocks on the CO<sub>2</sub>R selectivity by using more relevant gas diffusion electrodes. I appreciate the work and the focus on practical incoming streams with impurities. Although significant improvements are called for above, I remain upbeat that a suitably revised paper would warrant publication in *Nature Communications*.

Reviewer #2 (Remarks to the Author):

The manuscript by Ko et al. presents an important quality study on the effects of NO<sub>x</sub> contaminants in the CO<sub>2</sub> feed gas on the performance of three benchmark catalysts for the carbon dioxide electroreduction. The work is generally well designed and presented, though the reviewer still has several scientific questions/suggestions detailed below.

More importantly, the level of innovation of this study does not seem to match the expectations for a paper to be published in the Nature Communications journal. The reviewer would probably change their opinion if the authors introduced a technologically simple solution for the elimination of the pernicious NO<sub>x</sub> effects (e.g. through gas-liquid scrubbing) and demonstrated its efficient implementation through sufficiently long-term experiments (days). Otherwise, the reviewer can only recommend the publication of the manuscript by Ko et al. in a specialised journal, not Nature Communications.

Other comments:

1| The reviewer could not identify any data on the reproducibility of the results. A top-quality study cannot be based on single runs of each type of experiments – reliability should be demonstrated through consistent results derived from several repeats and presentation of all key data with an appropriately quantified errors attached.

Providing values reported to 3 significant figures preceded by “approximately” is not appropriate as well.

2| It is not clear how introduction of 1% NO and 0.3 % NO<sub>2</sub> into CO<sub>2</sub> stream was achieved using 5% NO in Ar and 1% NO<sub>2</sub> in Ar. Does this mean that actual gas phase composition during the periods when NO<sub>x</sub> compounds were present were 80% CO<sub>2</sub> + 19% Ar + 1% NO and 67% CO<sub>2</sub> + 32.7% Ar + 0.3 % NO<sub>2</sub>, not “1% NO, 0.3% NO<sub>2</sub>, ... in CO<sub>2</sub>”? If this was the case, the reviewer would strongly recommend undertaking relevant control experiments with 80% CO<sub>2</sub> + 20% Ar and 67% CO<sub>2</sub> + 33% Ar mixtures to demonstrate that the decrease in the CO<sub>2</sub> reduction rate is actually exclusively due to the presence of NO<sub>x</sub>.

3| Moreover, control experiments with no NO<sub>x</sub> present are anyway required to confirm that the detected continuous deterioration of the performance for all tested materials is the inherent property of each system, not the effect of nitrogen oxides.

4| In XPS, did the new nitrogen signals decrease in intensity after NO<sub>x</sub> were removed, or remained constant?

Additionally, the reviewer cannot agree with the background (and therefore the overall) fitting of the N 1s XPS data, at least in the way these results are currently presented. Why the background appears like a tangent to the experimental data, rather than an actual fit (i.e. goes approximately in the middle of the noise)?

5| It would be more convenient if potentials were recalculated to the RHE scale to facilitate comparisons with the data in Fig. 1.

Additionally, a bit more details on the IR correction procedure would be desirable: (i) how the Ru values derived from the not highly reliable current-interrupt method compared to a more precise EIS measurements? (ii) were the potential values manually post-corrected (this is not quite clear)?

6| The GC analysis of N<sub>2</sub> is mentioned, but the reviewer could not see any relevant experimental data. Additionally, proper level of details on this analysis should be provided in experimental (temperature gradient, gas carrier / flow rate, sample volume, standard gas mixtures, etc.).

7| The level of details provided for the physical characterisation is unacceptably short and is often limited to the model of the instrument employed. Sample preparation, handling and mounting procedures, conditions during analysis, key instrumental parameters, data analysis protocols – all of these should be explained for every method employed.

Minor:

8| A conceptual comment on the statement “greenhouse gas CO<sub>2</sub>, which is independent of fossil sources, such as coal, oil, and natural gas.”: this does not seem to connect well to the problem of NO<sub>x</sub>

and other admixtures in CO<sub>2</sub>, i.e. the fact that the CO<sub>2</sub>RR technology would be most useful when coupled to the existing fossil fuel plants. If CO<sub>2</sub> is not coming from these plants, the mechanisms for NO<sub>x</sub> and SO<sub>x</sub> contamination need to be better explained.

9| Electrochemical half-reaction terminology always includes "R" in the end standing for reaction(s). Although "CO<sub>2</sub>R", "N<sub>2</sub>OR" and "NO<sub>2</sub>R" might not cause too much confusion, the acronym "NOR" actually stands for the nitrogen oxidation reaction. Overall, conversion of all "XR" to "XRR" is recommended.

10| "electron efficiency" is quite a strange term that does not help explaining what faradaic efficiency is. To be confident that the reviewer's memory does not fail them, classical electrochemistry textbooks and Bard's electrochemical dictionary have been checked before writing this comment.

11| Tables S5-S7 – why Total value is "n/a"? Besides, it might be more informative to use < [LOD value], rather than unexplained "n/a" abbreviation for the components that were not detected (if the reviewer interprets these data correctly).

12| XPS spectra = X-ray photoelectron spectroscopy spectra = salty salt.

13| Line 273: "1 cm-2" should be fixed.

14| Line 302: "um" should be "µm".

Reviewer #3 (Remarks to the Author):

#### Summary:

The article submitted for publication by Ko and coworkers examines the impact of NO<sub>x</sub> impurities upon electrochemical CO<sub>2</sub> reduction. The authors study Cu, Ag, and Sn, which are highly active CO<sub>2</sub> reduction catalysts for C<sub>2</sub>+ products, CO, and formate, respectively. The authors find that of the impurities NO, NO<sub>2</sub>, and N<sub>2</sub>O, it is primarily NO and NO<sub>2</sub> which negatively but reversibly impact the performance of high-rate GDE flow cell systems for CO<sub>2</sub> electrolysis. The results of the study indicate that when NO<sub>x</sub> impurities are added to the gas feed stream during CO<sub>2</sub> reduction, FE for CO<sub>2</sub> reduction decreases due to the competing NO<sub>x</sub> reduction reactions, which in the case of NO reduction largely produces NH<sub>3</sub> (as well as some N<sub>2</sub>O on Cu), and in the case of N<sub>2</sub>O reduction largely produces N<sub>2</sub> (except over Sn where N<sub>2</sub>O is not easily reduced). Catalytic performance of CO<sub>2</sub> reduction bounces back, however, when the NO<sub>x</sub> impurities are removed. The authors argue based on catalyst characterization data that the presence of NO<sub>x</sub> during electrolysis results in nitridation of the carbon paper catalyst support, while the metal catalyst particles are unaffected, in part due to the reductive potential of the cathode.

This is an impactful and important paper for the field of CO<sub>2</sub> reduction in that it evaluates a crucial practical aspect of high-rate CO<sub>2</sub> electrolysis that will influence practical implementation, while taking a basic science perspective to this question. The catalysts chosen for study, as well as the conditions of the study (i.e. a high-rate flow cell setup), were well-selected for practical applicability. However, there are some questions which should be addressed by the authors to strengthen their work and clarify both their procedures and conclusions. These questions and suggestions are grouped below:

#### 1. Site blocking:

What are the authors' conclusions or next hypotheses based on the competition effect that they observe? I'm particularly interested in distinguishing the "competing reaction" versus the "site-blocking" depiction, which is shown in figure 1A. Clearly the reactions are occurring concurrently, which is what the first panel shows. But based on Figure 2, there is no distinct change in cathodic operating potential as NO is added to the feed stream. A decrease in CO<sub>2</sub>R FE at constant current

means the CO<sub>2</sub> partial current has decreased. This happening while potential is held more or less constant would imply competition for active sites, or "site blocking," not necessarily brought about by catalyst poisoning but by high coverage of active sites which are dynamically exchanging substrates. What do the authors think about this? Do they have an alternative explanation for why partial current for CO<sub>2</sub>R would decrease at a constant potential? (Note: if potential is not roughly constant, then the potential axis on Figure 2 needs to be re-scaled to accurately depict changes.)

## 2. Transport:

a. The argument that N<sub>2</sub>O is less reactive than NO<sub>2</sub> or NO is at least partially predicated on the notion that all of these reactions are under kinetic control at the conditions of interest – is this the case? I drew up some math for a flooded system that wouldn't apply to a GDE, but I'll present it here anyway: NO as an example is 18x less soluble than CO<sub>2</sub> with concentration in water of around 2 mM at 25 C saturation. So 1% NO gas would result in a 0.02 mM NO solution. In flooded configuration one would not expect higher rates than hundreds of micro-Amps at most. By what factor can we expect transport-limited currents to increase in the GDE configuration, especially given the catalyst-flooding argument that the authors present?

b. The above comment could be addressed experimentally fairly easily. A good place to start is with cyclic voltammetry. Fig. S3 is interesting – I'd be curious to see what the CV would look like with 1% NO in an inert balance (N<sub>2</sub> or Ar). One would expect with the large difference in standard reduction potential between NO and CO<sub>2</sub> that the onset of NOR might be significantly positive of CO<sub>2</sub>R. It's hard to tell from these plots what the NOR looks like on its own, even if we just assume that the currents are purely additive. Is it possible that even in this GDE setup, because NO is so dilute, the reaction could be reaching transport limitations prior to CO<sub>2</sub>R onset? Especially on Ag it appears that NOR sort of "plateaus" at around -0.7 V vs. RHE at a current density of ~10 mA/cm<sup>2</sup>. It's hard to tell without the NO-only CV.

## 3. Gas composition choices & procedures:

a. Methods: Flow Cell Electrolysis – this section says that stock gases were already dilute: NO stock was 5% in Ar and NO<sub>2</sub> was 1% in Ar. This means that a large portion of the inlet gas consisted of Ar. Can the authors speak to how they kept the partial pressure of CO<sub>2</sub> constant in the electrolysis cell across all conditions? This is important, because unless this constant-CO<sub>2</sub>-pressure condition was met, the decrease in CO<sub>2</sub>R FE could be attributed merely to lower CO<sub>2</sub> partial pressures rather than to the interference of NO<sub>x</sub> as the authors claim. (Note that constant mass flow does not equate to constant pressure!)

b. I'm intrigued by the authors' choice to use 0.3% NO<sub>2</sub> while the other gases are present at 1%. Why the distinction? It seems that even if the percentage NO<sub>x</sub> component used is indicative of its concentration in industrial flue gas, we would gain more by comparing the gases in equal quantity to normalize for gas availability. The authors should justify their decision.

c. In all of the cases where FEMS was used, the authors have justified their use of 1% NO in Ar rather than in CO<sub>2</sub>. It appears that the total current density applied during these tests was the same as that applied in the experiments with 1% NO in CO<sub>2</sub>. It would seem that the potential required in order to achieve this current would be greater in the case of 99% inert gas than it would be in the case of fully reactive gas. What is the cathode potential during these tests without CO<sub>2</sub>? If the cathode has to be held at a higher potential in order to achieve the same current density, then is not the NOR facing a different overpotential? How then are the results in the presence of 99% Ar translatable to a system with 99% CO<sub>2</sub>, when the catalytic system used to interrogate CO<sub>2</sub> reduction response to NO<sub>x</sub> and the one used to interrogate NO<sub>x</sub> reduction products both contain different gases and are held at different potentials?

d. NO<sub>2</sub> hydrolyzes in water to generate nitric acid and nitrous acid. To what extent does the gas dissolve into the electrolyte? Could this affect the catalyst? Is this effect dampened by the fact that the electrolyte is constantly replenished?

#### 4. N<sub>2</sub>O as a less-reactive species:

a. Line 133: the authors claim that CO<sub>2</sub>R on Sn catalyst is not affected by the presence of N<sub>2</sub>O because Sn is a bad N<sub>2</sub>O catalyst, then provide a citation. However, in the citation it appears that at -1.7 V vs. Ag/AgCl (a potential within the range of CVs in the present work's SI), Sn catalyzes N<sub>2</sub>O reduction to N<sub>2</sub> with ~70% FE at a total current of 8 mA/cm<sup>2</sup>, and this was in a flooded electrode configuration, although at 100% N<sub>2</sub>O. Is the explanation that the current toward N<sub>2</sub>O reduction is small in comparison to the 100 mA/cm<sup>2</sup> current being drawn by CO<sub>2</sub> reduction? Could concurrent CO<sub>2</sub> reduction actually diminish the amount of N<sub>2</sub>O reduction occurring? It would be nice if the authors could give their thoughts.

b. Lines 143-145 suggest that Cu is a good NO<sub>x</sub> reduction catalyst and point to this as a direction for future study. It is worth pointing out that citation 23 mentioned above does actually include Cu as one of the best-performing N<sub>2</sub>O reduction catalysts, achieving high FEs for N<sub>2</sub>O to N<sub>2</sub> at relatively low overpotentials.

#### 5. Catalyst oxidation state:

It seems that the factors of oxidation by NO<sub>x</sub> and reduction by potential are competing here. The authors have shown that pre-treated catalysts will revert back to metal under reductive potential, but this does not necessarily mean that this is the case even when the catalyst is being actively exposed to NO<sub>x</sub>. It seems that in-operando experiments would be most useful here to definitively show the oxidation state of the catalyst. However, lacking sure evidence, I would tend to form a hypothesis in agreement with the authors' conclusions – it would not surprise me if under the strongly reductive potentials required for CO<sub>2</sub>R, the catalysts were fully metallic.

#### 6. FE closure:

Can the authors explain why their FE closure is sub-90% in all cases (and sub-70% in some) even with a pure CO<sub>2</sub> feed? At such high currents there should be little issue detecting products. Can the balance be attributed to product crossover to the anolyte?

#### 7. Transient selectivity changes:

The authors claim that increases in HER (and if I may add from my own interpretation, formate – which tends to be an "outer-sphere" CO<sub>2</sub>R product) over time are due to GDE flooding, based on a previous paper of theirs. Do we know in this instance whether this holds true? For instance, what is the 3-hour CO<sub>2</sub>R baseline (no NO added)? Could transient changes (e.g. increase in HER FE) be attributed to metal plating? This is not a huge priority, since transient changes are not on a scale that derails the central argument of the paper.

#### 8. General comments on methods and SI:

a. Could the authors provide some supporting data or at least a comprehensive reference on their Nessler's method calibration curves, exact procedure, etc.?

b. The choice to detect NOR products via FEMS is interesting. It seems that the drawback mentioned by the authors in the SI is significant: simultaneous NOR and CO<sub>2</sub>R are difficult to study. Is it not possible to use in-line gas chromatography to detect N<sub>2</sub> and N<sub>2</sub>O, as was done during N<sub>2</sub>O reduction?

c. Could the authors provide a more thorough SI explanation of the MS processing techniques used? It is currently a bit difficult to follow the logic behind these steps. After reading for quite some time I eventually ascertained that, for example, Figure S9 represents the raw data for NOR on Cu; Figure S10 shows how background contributions from water and CO<sub>2</sub> are subtracted from the m/z = 17 and 44 peaks respectively; Figure 4c shows the background-subtracted data for these two m/z and additionally m/z = 30 which contains both NO and N<sub>2</sub>O, but which can be distinguished by accounting for the N<sub>2</sub>O area based off the m/z = 44 peak as well as the ratio of peaks in the pure N<sub>2</sub>O spectrum;

and Figure 4d combines all of this information to show how the  $m/z = 14$  peak can be broken down into contributions from NO consumed, NH<sub>3</sub> produced, and N<sub>2</sub>O produced. A description to this end would be useful.

d. The authors should provide a sample MS of CO<sub>2</sub> in Figure S11 if they're going to be using the CO<sub>2</sub> spectrum to process data.

e. The authors argue that the residual of the  $m/z = 14$  peak being near-zero is sufficient to say that no N<sub>2</sub> is produced. While I agree this should be decently good evidence for that, could we not tell this more directly (i.e. with fewer contributions to subtract out) by examining the  $m/z = 28$  peak, which only appears to contain contributions from N<sub>2</sub> and N<sub>2</sub>O? Are results obtained in this manner consistent with results obtained using the authors' approach?

f. Can the authors detail the procedure for XPS and XAS preparation? Were the catalysts exposed to air in the process of transferring from electrolysis cell to XPS for analysis? If so, how long did this take? Similarly, how long before XAS were the catalysts exposed to NO<sub>x</sub>? In what environment were they kept in the interim?

g. Nessler's reagent is prone to significant errors in quantification and the indophenol method should be used instead to confirm results

#### 9. Small corrections and typos:

a. I would recommend including Engelbrecht et al. 2017

(<https://doi.org/10.1016/j.electacta.2016.12.059>) in the literature review – the specific goal of this paper was to oxidize the Cu catalyst by co-feeding O<sub>2</sub> during CO<sub>2</sub> reduction (second effect depicted in your Fig. 1A).

b. Two tables are listed as "Table S1" in the supporting information

c. Line 188: it's probably best to remind the reader in this spot what the loss of CO<sub>2</sub>R FE was during these tests so they don't have to go back and look to check that this is a true statement.

d. Table S11 caption: could the authors clarify what they mean by "N content has been calculated relative to metal content"? I would assume this means that the percentage column is equal to 100% times the ratio N/(N plus the nominal metal), but want to clarify.

e. Methods line 266: I'm guessing "Sn (0.1 m, Alfa Aesar)" really means 0.1 μm rather than 0.1 m. Those are some big particles if not! :)

f. Line 305-306: SEM here refers to secondary electron multiplier – I might suggest using terminology which corresponds to the acronym so that it's not confusing.

This is an important contribution to the literature - if the revisions above are made, I would advocate for accepting the article.

## RESPONSES TO REVIEWER COMMENTS

### Reviewer #1 (Remarks to the Author):

In this work, Byung Hee Ko et al. investigate the role of nitrogen oxides (NO<sub>x</sub>) on the selectivity and cell voltage of a carbon dioxide reduction cell. The impacts of 3 gas impurities (NO, NO<sub>2</sub>, and N<sub>2</sub>O) in the CO<sub>2</sub> stream are measured independently. Three model catalysts (Cu, Ag, and Sn) are used to evaluate the performance changes for each metal. The authors show a reduction in selectivity towards CO<sub>2</sub>R products and the increase of N<sub>2</sub>O, N<sub>2</sub>, and NH<sub>3</sub> electroproduction. These nitrogen-containing products are quantified by flow electrochemical mass spectrometry. After the impurities are removed, the selectivity towards CO<sub>2</sub>R is re-established. The metal catalysts are determined to contain no traces of nitrogen using XPS, operando XANES, and EXAFS.

Comments:

1. Linking to past findings. Remove the sentence from the introduction “Understanding the behavior of the NO<sub>x</sub> impurities in CO<sub>2</sub>R is of great importance for practical CO<sub>2</sub> electrolysis devices, but it has not been explored yet.” Replace it with a more fulsome discussion of past work and key findings including the details of your reference 18, Zhai et al. ECS Transactions (2009), and Komatsu et al. [Preparation of Cu-solid polymer electrolyte composite electrodes and application to gas-phase electrochemical reduction of CO<sub>2</sub>, *Electrochimica Acta* (1995)], and other relevant studies citing those. Frame the contribution here more clearly in that context.

#### Reply:

We thank the reviewer for the constructive comments. The following discussion has been added to the manuscript and the work by Komatsu et al. has been cited as reference #18:

“Previous study has shown that 200 ppm of NO has a negligible influence on Cu catalysts in CO<sub>2</sub>RR in a conventional batch cell.<sup>18</sup> Furthermore, less than or equal to 1667 ppm of NO<sub>2</sub> has shown to be either beneficial or neutral, and greater than 1667 ppm of NO<sub>2</sub> has shown to be detrimental in CO<sub>2</sub>RR, mainly due to a reduction in pH of the electrolyte, also on Cu catalysts in a conventional batch cell.<sup>19</sup> However, the behavior of various NO<sub>x</sub> impurities in CO<sub>2</sub>RR at industrially relevant high current densities (>100 mA cm<sup>-2</sup>) has not been explored yet.” (Page 2, Lines 50-56)

2. Conduct further analyses of mass transporting limiting partial current towards NO<sub>x</sub>R as a function of gas flow rate. How much of the NO<sub>x</sub> is reduced and how much is left unreacted? Is the loss of current towards CO<sub>2</sub>R products disastrous even at low gas flow rates? This analysis need not be complex. For instance, a simple calculation could show the amount of current lost to NO<sub>x</sub>R if all of the NO<sub>x</sub> that enters the cell is reduced. I would encourage more thinking and analysis along these lines, and some contextualization of the scale of this loss for typical systems and typical impurity containing streams.

#### Reply:

We have evaluated the influence of NO in CO<sub>2</sub>RR at two additional concentrations of 0.083%, representing the typical NO<sub>x</sub> concentration in flue gases, and 0.0083%, representing the typical NO<sub>x</sub> concentration after the NO<sub>x</sub> removal process (**Fig. R1**). Although the losses in

CO<sub>2</sub>RR FE at 0.83% were detrimental, the effect was less severe at 0.083% NO, with less than 5% loss in CO<sub>2</sub>RR FE, and negligible at 0.0083% NO. Therefore, we conclude that NO at typical concentrations of NO<sub>x</sub> in flue gases is compatible with CO<sub>2</sub>RR, although a complete removal of NO<sub>x</sub> is desired to maximize CO<sub>2</sub>RR FE.

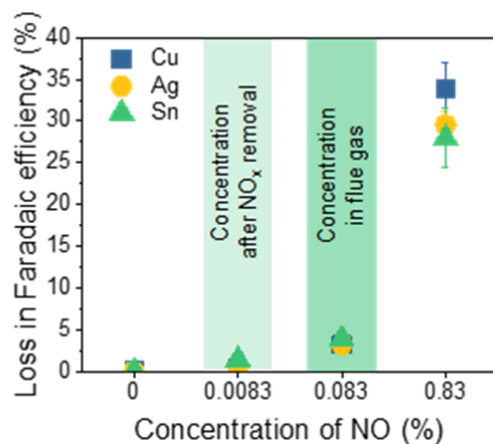

**Figure R1 (New Figure 2d).** Effect of different concentrations of NO in CO<sub>2</sub> electroreduction on Cu, Ag, and Sn catalysts. 0.083% and 0.0083% represent the typical NO<sub>x</sub> concentration in flue gases and flue gases after NO<sub>x</sub> removal processes, respectively.

In the revised manuscript, we have included the following discussion:

“Investigation of the effect of different concentrations of NO in CO<sub>2</sub>RR shows that NO<sub>x</sub> at typical concentrations in flue gases is compatible with CO<sub>2</sub>RR.” (Page 3, Lines 77 and 79)

“To obtain insight on the influence of NO<sub>x</sub> in CO<sub>2</sub>RR at typical concentrations of NO<sub>x</sub> in point sources, we evaluated the effect of 0.083% and 0.0083% NO, representing the typical NO<sub>x</sub> concentration in flue gases and flue gases after NO<sub>x</sub> removal processes,<sup>22</sup> respectively, in CO<sub>2</sub>RR (Fig. 2d). Although the losses in FE at 0.83% NO were detrimental, the effect of NO was less severe at 0.083%, with less than 5% losses in FE, and negligible at 0.0083% NO. Therefore, NO at typical concentrations of NO<sub>x</sub> in flue gases is compatible with CO<sub>2</sub>RR, although a complete removal of NO<sub>x</sub> is desired to maximize CO<sub>2</sub>RR FE.” (Page 5, Lines 132-138)

Furthermore, we have calculated the conversion of NO during CO<sub>2</sub>RR with the introduction of 0.83% NO, assuming NO fully is converted to NH<sub>3</sub> (**Table R1**). Conversions of NO were 59.1%, 51.5%, and 48.7% on Cu, Ag, and Sn catalysts, respectively.

**Table R1 (New Table S5).** Conversion of NO during CO<sub>2</sub>RR with the introduction of 0.83% NO, assuming NO is fully converted to NH<sub>3</sub>.  

$$\text{Conversion (\%)} = \frac{\text{Current loss due to NO}}{\text{Current required to fully convert NO to NH}_3} \times 100.$$
 Full conversion of NO to NH<sub>3</sub> requires 57.4 mA.

| Catalyst       | Cu   | Ag   | Sn   |
|----------------|------|------|------|
| Conversion (%) | 59.1 | 51.6 | 48.7 |

In the revised manuscript, we have included the following discussion:



“Assuming NO is fully converted to NH<sub>3</sub>, conversions of NO during CO<sub>2</sub>RR are between 48% and 62% (Table S5).” (Page 4, Lines 117-118)

3. Discuss the effect of NO<sub>2</sub> on HER. Tables S5, S6, and S7 show that the HER is eliminated for all catalysts in the presence of NO<sub>2</sub>. It would be very interesting to mechanistically understand this phenomenon and whether it can be applied to reduce HER in typical CO<sub>2</sub>R systems. Moreover, how does the cost of NO<sub>x</sub>R (see 2 above) change if an offsetting benefit of HER suppression is achieved, or could be achieved. The mechanism here – although not the main focus of the paper – is intriguing and worthy of discussion.

**Reply:**

We apologize for the confusion. We originally thought that NO<sub>2</sub> produces a peak near H<sub>2</sub> peak in GC, making it difficult to quantify H<sub>2</sub>. During the revision, we have confirmed that NO<sub>2</sub> does not overlap with H<sub>2</sub> and accurately quantified H<sub>2</sub> FE for the experiment with NO<sub>2</sub>. In the revised manuscript, we have provided the updated H<sub>2</sub> FE in **Tables S7-9**. Similar to the introduction of NO and N<sub>2</sub>O, the introduction of NO<sub>2</sub> slightly decreases or has negligible effect on H<sub>2</sub> FE.

4. Why does the addition of the NO<sub>x</sub> have a negligible influence on the cell voltage during the constant current experiments? This disagrees with the CVs, which show a large influence on the cell voltage, especially when 0.3% NO<sub>2</sub> is added.

**Reply:**

Introduction of NO<sub>x</sub> shifts the potential during the constant current experiments, and we have adjusted the scale of the potential axis to show this more clearly (**Fig. 2a-c, S6, and S7**), although the large fluctuation in potentials caused by continuous bubble formation and flush out on the electrode surface makes the shift in potential less evident. Regarding the difference between the constant current experiments and the CV measurements, the CV measurements do not necessarily translate directly to the constant current experiments. We used 50 mV/s as the scan rate for the CV measurements and the intensity of currents in the CV measurements is dependent on the scan rates. Although the trends will remain the same, the intensity will be lower for the slow scan rates and greater for the fast scan rates.

5. What are the implications of N-C bonds in the GDL from your XPS investigation? If there are no implications, consider removing some of the panels of Figure 5.

**Reply:**

Thank you for the suggestion. In the revised manuscript, we have moved two panels from the main figure to the SI (**Fig. S27 and Fig S30**) and the revised **Figure 5** is shown below (**Fig. R2**).

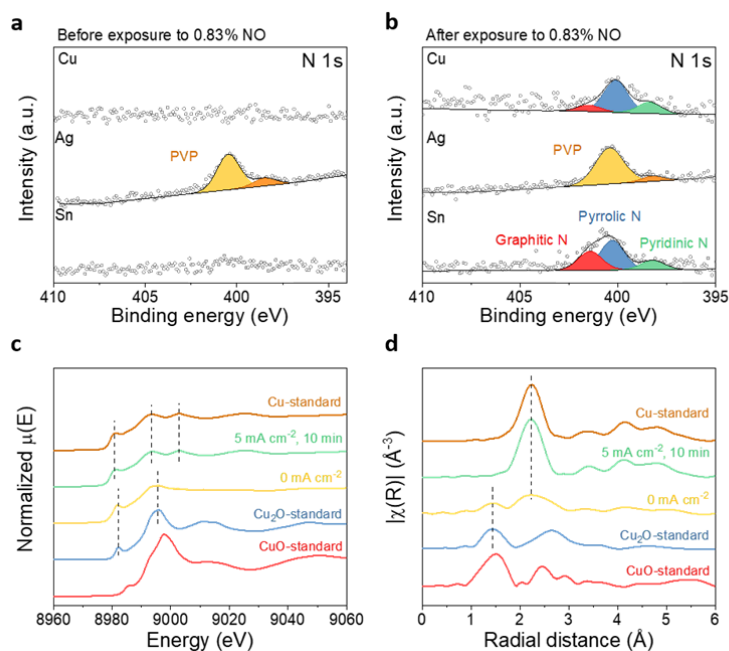

**Figure R2 (New Figure 5).** Evaluation of the influence of NO on the catalyst structure. XPS measurements of Cu, Ag, and Sn electrodes (a) before exposure to 0.83% NO ( $t=0$  hour), (b) after exposure to 0.83% NO ( $t=1$  hour). Corresponding XPS data is provided in Fig. S18 and Table S11. Cu K-edge (c) XANES and (d) EXAFS spectra of Cu catalyst after exposure to 0.83% NO. Cu foil, Cu<sub>2</sub>O, and CuO were used as references.

6. Include additional discussion on strategies to avoid the detrimental effects of the lost current towards CO<sub>2</sub>RR (or whether the value of the ammonia, including separation offsets the decreased CO<sub>2</sub>RR selectivity).

**Reply:**

As discussed in **Q2 (Reviewer 1)**, we conclude that although high concentrations of NO<sub>x</sub> may be detrimental to CO<sub>2</sub>RR, NO<sub>x</sub> at typical concentrations of flue gases is compatible with CO<sub>2</sub>RR, causing small losses of CO<sub>2</sub>RR FE without altering the catalyst properties permanently. Integration of NO<sub>x</sub> removal process, which is a relatively mature technology, may also be considered to ensure CO<sub>2</sub>RR operation at maximum efficiency. In addition, because the loss in FE is relatively small at typical NO<sub>x</sub> concentrations in flue gases, production of NORR products, such as ammonia, is too low to be considered as main products.

In the revised manuscript, we have added the following discussion in the Conclusions section:

“Furthermore, although high concentrations of NO<sub>x</sub> may be detrimental to CO<sub>2</sub>RR, NO<sub>x</sub> at typical concentrations of flue gases is compatible with CO<sub>2</sub>RR, causing small losses in CO<sub>2</sub>RR FE. NO<sub>x</sub> removal process, which is a relatively mature technology, may also be employed to ensure CO<sub>2</sub>RR operation at maximum efficiency.” (Page 10, Lines 309-312)

Overall, this work builds on previous studies on the impact of NO<sub>x</sub> impurities contained within CO<sub>2</sub> feedstocks on the CO<sub>2</sub>RR selectivity by using more relevant gas diffusion

electrodes. I appreciate the work and the focus on practical incoming streams with impurities. Although significant improvements are called for above, I remain upbeat that a suitably revised paper would warrant publication in Nature Communications.

#### **Reviewer #2 (Remarks to the Author):**

The manuscript by Ko et al. presents an important quality study on the effects of NO<sub>x</sub> contaminants in the CO<sub>2</sub> feed gas on the performance of three benchmark catalysts for the carbon dioxide electroreduction. The work is generally well designed and presented, though the reviewer still has several scientific questions/suggestions detailed below.

More importantly, the level of innovation of this study does not seem to match the expectations for a paper to be published in the Nature Communications journal. The reviewer would probably change their opinion if the authors introduced a technologically simple solution for the elimination of the pernicious NO<sub>x</sub> effects (e.g. through gas-liquid scrubbing) and demonstrated its efficient implementation through sufficiently long-term experiments (days). Otherwise, the reviewer can only recommend the publication of the manuscript by Ko et al. in a specialised journal, not Nature Communications.

We thank the reviewer for the comments. As NO<sub>x</sub> removal is a relatively mature technology, we believe the demonstration of the integration of NO<sub>x</sub> removal process and CO<sub>2</sub>RR system is out of scope of this work. In fact, we could consider the CO<sub>2</sub> electrolyzer itself as a potential solution to remove low concentrations of NO<sub>x</sub>. This work is focused on understanding the effect of trace amount of NO<sub>x</sub>, common contaminants in flue gases, in CO<sub>2</sub>RR, and we provide a comprehensive insight on the effect of NO<sub>x</sub> in CO<sub>2</sub>RR at commercially relevant high current densities. Given the rapid growth and commercialization activities of the CO<sub>2</sub> electrolysis technology, this work is an important contribution to reveal the potential impacts of NO<sub>x</sub> in realistic CO<sub>2</sub> sources. We believe that the reviewer's comments are fully addressed and the revised manuscript is suitable for a publication in Nature Communications.

Other comments:

1| The reviewer could not identify any data on the reproducibility of the results. A top-quality study cannot be based on single runs of each type of experiments – reliability should be demonstrated through consistent results derived from several repeats and presentation of all key data with an appropriately quantified errors attached.

Providing values reported to 3 significant figures preceded by “approximately” is not appropriate as well.

#### **Reply:**

In the revised manuscript, all experiments have been repeated three times and error bars have been included (**Figs. 2a-c, 3, 4a, S6, S7, and S12**). The error bars represent the standard deviation of three independent measurements.

We have also removed “approximately” in the manuscript.

2| It is not clear how introduction of 1% NO and 0.3 % NO<sub>2</sub> into CO<sub>2</sub> stream was achieved using 5% NO in Ar and 1% NO<sub>2</sub> in Ar. Does this mean that actual gas phase composition during the periods when NO<sub>x</sub> compounds were present were 80% CO<sub>2</sub> + 19% Ar + 1% NO and 67% CO<sub>2</sub> + 32.7% Ar + 0.3 % NO<sub>2</sub>, not “1% NO, 0.3% NO<sub>2</sub>, ... in CO<sub>2</sub>”? If this was the

case, the reviewer would strongly recommend undertaking relevant control experiments with 80% CO<sub>2</sub> + 20% Ar and 67% CO<sub>2</sub> + 33% Ar mixtures to demonstrate that the decrease in the CO<sub>2</sub> reduction rate is actually exclusively due to the presence of NO<sub>x</sub>.

**Reply:**

We apologize for the confusion. The reviewer is correct that Ar is introduced with NO<sub>x</sub> mixture. To eliminate the effect of the change in CO<sub>2</sub> partial pressure during the introduction of NO<sub>x</sub> mixture containing Ar, CO<sub>2</sub> partial pressure was controlled throughout the experiment by flowing Ar with CO<sub>2</sub> when NO<sub>x</sub> was not required in the gas feed. In essence, the total flow rate of the gas feed was fixed at 19.2 mL min<sup>-1</sup>. The gas feed was switched from a mixture of 83.3% CO<sub>2</sub> and 16.7% Ar to a mixture of 83.3% CO<sub>2</sub>, 15.87% Ar, and 0.83% NO<sub>x</sub>, and then back to a mixture of 83.3% CO<sub>2</sub> and 16.7% Ar. We also purchased 5% NO<sub>2</sub> (balanced by Ar) during the revision process to ensure that all NO, NO<sub>2</sub>, and N<sub>2</sub>O experiments are conducted in the same way for a fair comparison of the effect of different NO<sub>x</sub> in CO<sub>2</sub>RR.

In the revised manuscript, we included the following explanation:

“As the concentration of NO<sub>x</sub> in typical exhaust streams may be as high as ~3,000 ppm (i.e., 0.3 vol. %),<sup>13</sup> conservative streams of 83.3% CO<sub>2</sub>, 15.87% Ar, and 0.83% NO<sub>x</sub> were used for most studies. To keep the CO<sub>2</sub> partial pressure constant during the introduction of NO<sub>x</sub>, CO<sub>2</sub> partial pressure was maintained at 0.833 bar throughout the study by using a mixture of 83.3% CO<sub>2</sub> and 16.7% Ar when NO<sub>x</sub> was not introduced.” (Page 3, Lines 89-93)

Furthermore, more detail was added to the methods section:

“The total gas flow rate was maintained at 19.2 mL min<sup>-1</sup> with different flow rates of CO<sub>2</sub>, Ar (Keengas, 99.999%), and NO<sub>x</sub>. For instance, 83.3% CO<sub>2</sub> and 16.7% Ar was prepared by flowing 16 mL min<sup>-1</sup> CO<sub>2</sub> and 3.2 mL min<sup>-1</sup> Ar via Brooks GF40 mass flow controllers. The gas mixtures of 83.3% CO<sub>2</sub>, 15.87% Ar, and 0.83% NO<sub>x</sub> were prepared by flowing 16 mL min<sup>-1</sup> CO<sub>2</sub> with 3.2 mL min<sup>-1</sup> of 5% NO/Ar (Matheson Gas) or 3.2 mL min<sup>-1</sup> of 5% NO<sub>2</sub>/Ar (Matheson Gas), respectively, using a 50 mL gastight syringe (1050 SL, Hamilton) via a syringe pump (Cole Parmer). Syringes were quickly switched to another syringe filled with NO or NO<sub>2</sub> before running out of gases. Similarly, 83.3% CO<sub>2</sub>, 15.87% Ar, and 0.83% N<sub>2</sub>O was prepared by flowing 16 mL min<sup>-1</sup> CO<sub>2</sub>, 3.04 mL min<sup>-1</sup> Ar, and 0.16 mL min<sup>-1</sup> N<sub>2</sub>O (99.99%, Matheson Gas).” (Page 11, Lines 331-340)

3| Moreover, control experiments with no NO<sub>x</sub> present are anyway required to confirm that the detected continuous deterioration of the performance for all tested materials is the inherent property of each system, not the effect of nitrogen oxides.

**Reply:**

We have conducted control experiments with 83.3% CO<sub>2</sub> and 16.7% Ar for 3 hours on all three catalysts (**Fig. R3**). Similar trend of H<sub>2</sub> FE increase over time was observed on all three catalysts, regardless of the introduction of NO<sub>x</sub>, supporting that NO<sub>x</sub> is not the main cause for the increase in H<sub>2</sub>. In the revised manuscript, we have added this figure in **Fig. S5**.

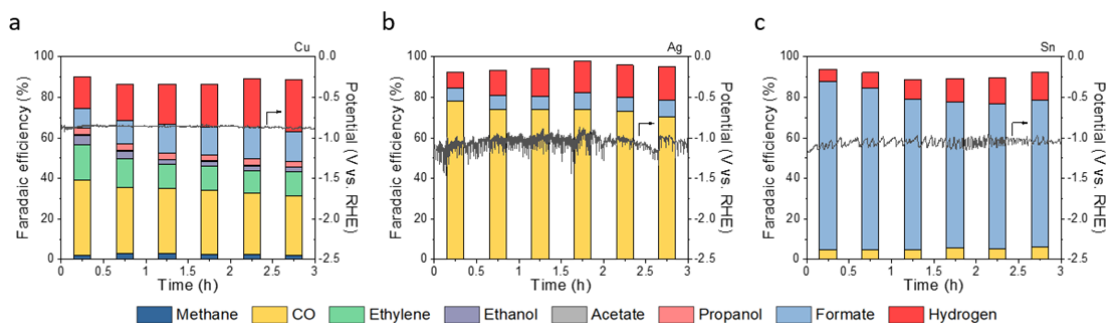

**Figure R3 (New Figure S5).** Faradaic efficiency and applied potential vs. time with 83.3% CO<sub>2</sub> and 16.7% Ar on (a) Cu, (b) Ag, and (c) Sn catalysts at a constant current density of 100 mA cm<sup>-2</sup> in 1 M KHCO<sub>3</sub> for 3 h. H<sub>2</sub> Faradaic efficiency increases over time due to slow flooding of the electrode, suggesting that NO<sub>x</sub> is not responsible for the H<sub>2</sub> FE increase.

4| In XPS, did the new nitrogen signals decrease in intensity after NO<sub>x</sub> were removed, or remained constant?

Additionally, the reviewer cannot agree with the background (and therefore the overall) fitting of the N 1s XPS data, at least in the way these results are currently presented. Why the background appears like a tangent to the experimental data, rather than an actual fit (i.e. goes approximately in the middle of the noise)?

**Reply:**

The XPS measurements obtained after 3-hour electrolysis show that the N incorporated in the electrode surface was still intact after additional 2 hour of CO<sub>2</sub>RR (Fig. S27 and Table S15), with the total amount of N in the Cu and Sn electrodes remaining relatively unchanged. See Page 8, Lines 249-251.

Regarding the XPS fitting, data points below the background were not shown in the previous data by mistake. In the revised manuscript, all data points below the background are shown and XPS results were fitted again when needed (Fig. 5a and b, and S27-30).

5| It would be more convenient if potentials were recalculated to the RHE scale to facilitate comparisons with the data in Fig. 1.

Additionally, a bit more details on the IR correction procedure would be desirable: (i) how the Ru values derived from the not highly reliable current-interrupt method compared to a more precise EIS measurements? (ii) were the potential values manually post-corrected (this is not quite clear)?

**Reply:**

We have adjusted all potentials to the RHE scale and clearly stated that the potentials are manually post IR-corrected.

We have also compared the resistances of our electrolyzers in 1M KHCO<sub>3</sub>, measured by electrochemical impedance spectroscopy (EIS) and current-interrupt (CI) (Fig. R4). EIS and CI yielded similar resistance values, with differences of approximately 0.3 ohms. The maximum discrepancy caused by the method at 100 mA is only 30 mV. Liu et al. have also measured the resistances with EIS and CI and showed the reliability of both methods.<sup>1</sup>

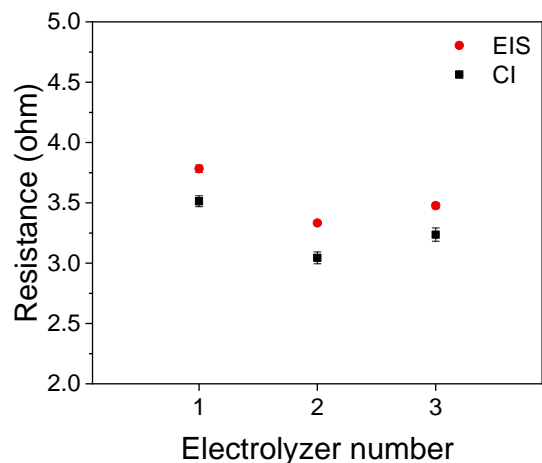

**Figure R4.** Measured resistance between the working and the reference electrodes of three different electrolyzer units in 1M KHCO<sub>3</sub> by EIS and CI.

Reference

1. Liu, K., Smith, W. A. & Burdyny, T. Introductory Guide to Assembling and Operating Gas Diffusion Electrodes for Electrochemical CO<sub>2</sub> Reduction. *ACS Energy Lett.* **4**, 639–643 (2019).

In the revised manuscript, we changed all potentials to the RHE scale (**Figs. 2a-c and S3-11**), clearly stated that the resistance was manually post-corrected, and included the reference for the CI technique.

“The half-cell potentials were measured with respect to Ag/AgCl reference electrode (Pine Research) and calculated to the RHE scale in which  $E \text{ (vs. RHE)} = E \text{ (vs. Ag/AgCl)} + 0.209 \text{ V} + 0.0591 \text{ V} \times \text{pH} - \eta_{IRdrop}$ . The pH was measured at the outlet of the catholyte channel. The resistance was measured with the current-interrupt technique,<sup>40</sup> and the measured potential was manually post IR-corrected” (Page 11, Lines 346-349)

6| The GC analysis of N<sub>2</sub> is mentioned, but the reviewer could not see any relevant experimental data. Additionally, proper level of details on this analysis should be provided in experimental (temperature gradient, gas carrier / flow rate, sample volume, standard gas mixtures, etc.).

**Reply:**

A typical GC analysis of N<sub>2</sub> during CO<sub>2</sub>RR with the introduction of NO and N<sub>2</sub>O on Cu, Ag, and Sn catalysts have been provided in **Figs. R5 and 6**, respectively. We have also added details on the GC analysis method in the methods section.

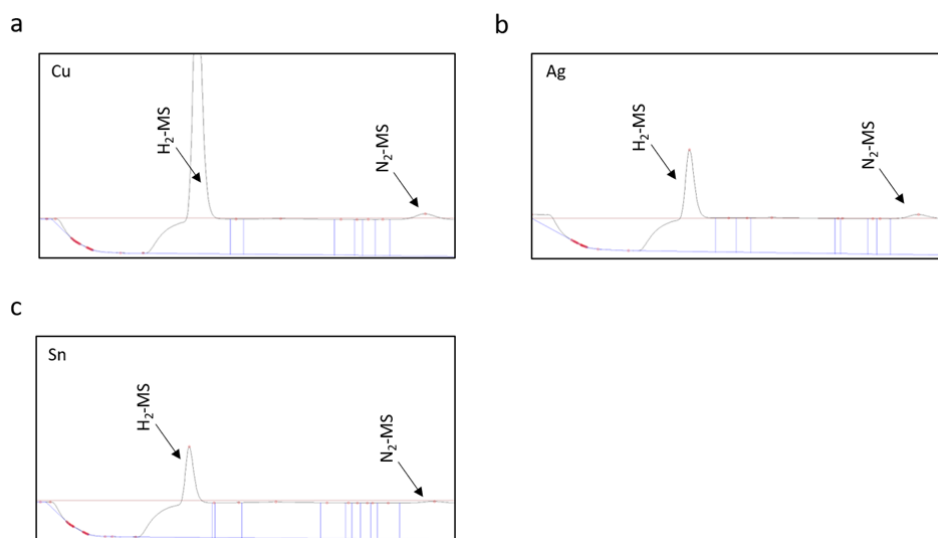

**Figure R5 (New Figure S13).** Chromatogram of gas products from electrolysis in 83.3% CO<sub>2</sub>+0.83% NO in Ar on (a) Cu, (b) Ag, and (c) Sn catalysts at 100 mA cm<sup>-2</sup>. TCD and Molecular sieve 5A (MS) column were used, and 0 to 2.1 min is shown.

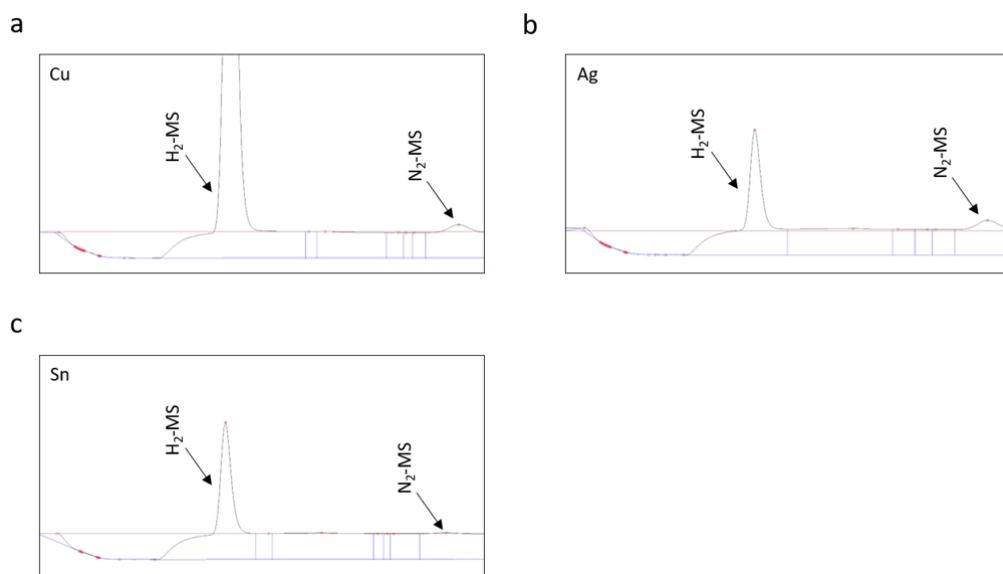

**Figure R6. (New Figure S26).** Chromatogram of gas products from electrolysis in 83.3% CO<sub>2</sub>+0.83% N<sub>2</sub>O in Ar on (a) Cu, (b) Ag, and (c) Sn catalysts at 100 mA cm<sup>-2</sup>. TCD and Molecular sieve 5A (MS) column were used, and 0 to 2 min is shown.

In the revised manuscript, we have added the following details in the methods section:

“Ar (Keengas, 99.999%) was used as a carrier gas with a flow rate of 19 mL min<sup>-1</sup> and 1 mL of sample was automatically loaded to the column. The gas sample was loaded to 0.5 m HaySep D pre-column connected to 2 m Molsieve 5A column at 0.050 min. At 0.490 min, any molecule remaining in the HaySep D precolumn was backflushed out to vent. At 2.150 min, gas sample was automatically loaded to 2 m HaySep D column. The column temperature was maintained at 35 °C for 2.950 min, increased to 210 °C at 40 °C/min, and maintained at 210 °C until the end of the analysis. A

typical GC analyses of potential CO<sub>2</sub>RR products, N<sub>2</sub>, NO, and N<sub>2</sub>O are provided in Fig. S38. 2% H<sub>2</sub>, 1% CO, 1% CH<sub>4</sub>, 1% C<sub>2</sub>H<sub>4</sub>, 0.50% C<sub>2</sub>H<sub>6</sub>, 0.25% C<sub>3</sub>H<sub>6</sub>, 0.25% C<sub>3</sub>H<sub>8</sub> in Ar (Matheson) was used to obtain the chromatogram of potential CO<sub>2</sub>RR products.” (Page 11 and 12, Lines 355-363)

7| The level of details provided for the physical characterization is unacceptably short and is often limited to the model of the instrument employed. Sample preparation, handling and mounting procedures, conditions during analysis, key instrumental parameters, data analysis protocols – all of these should be explained for every method employed.

**Reply:**

We thank the reviewer for the suggestion. In the revised manuscript, we have added more details to the material characterization methods.

“For SEM and XPS measurements, the electrodes were first taken out of the electrolyzer after electrolysis at desired time points. The electrodes were dried in the vacuum oven (MTI Corporation) for up to three days before SEM images were acquired with Auriga 60 CrossBeam (1.5 kV). The electrodes were quickly transported to the XPS equipment (K-alpha Alpha X-ray photoelectron spectrometer system, Thermo Fisher Scientific) after drying in the vacuum oven for 5 minutes. The electrodes were exposed to air for less than 20 minutes. High-resolution XPS measurements were obtained at a pass energy of 20 eV with a step size of 0.1 eV. Flood gun was turned on. Cu 2p, Ag 3d, and Sn 3d were scanned 10 times while N 1s was scanned 30 times. Four different spots were scanned and averaged.” (Pages 13, Lines 418-426)

“The electrodes were taken out of the electrolyzer at 1 h (after exposure to NO<sub>x</sub> for 0.5 h) during a 100 mA cm<sup>-1</sup> constant current CO<sub>2</sub>RR experiment with the introduction of NO<sub>x</sub> (Fig.2a-c, S6 and S7). In the case of NO<sub>2</sub>, the samples were exposed to 0.23% NO<sub>2</sub> instead due to the availability of the gas at the time of the experiment. The electrodes were quickly stored in vials filled with Ar and the vials were tightly sealed with Parafilm at the home institution. The electrodes were transported to the Brookhaven National Laboratory (New York, USA) and were loaded into a XAS batch cell, which was fabricated from Teflon and 304 stainless steel, with a Kapton film window for high transmissivity for X-ray measurements (Fig. S31). The electrodes were exposed to air for approximately 20 minutes before the measurement. Pt wire and Ag/AgCl were used as a counter and a reference electrode, respectively. 1M KHCO<sub>3</sub> was used as an electrolyte and CO<sub>2</sub> was flowed at 10 mL min<sup>-1</sup>.” (Page 13, Lines 430-441)

Minor:

8| A conceptual comment on the statement “greenhouse gas CO<sub>2</sub>, which is independent of fossil sources, such as coal, oil, and natural gas.”: this does not seem to connect well to the problem of NO<sub>x</sub> and other admixtures in CO<sub>2</sub>, i.e. the fact that the CO<sub>2</sub>RR technology would be most useful when coupled to the existing fossil fuel plants. If CO<sub>2</sub> is not coming from these plants, the mechanisms for NO<sub>x</sub> and SO<sub>x</sub> contamination need to be better explained.

**Reply:**

We agree with the review and the statement has been revised. The new sentence now reads as follows:



“The electrochemical CO<sub>2</sub> reduction (CO<sub>2</sub>RR) provides a promising, sustainable avenue to generate value-added fuels and chemicals from greenhouse gas CO<sub>2</sub>.”  
(Page 1, Lines 25-26)

9| Electrochemical half-reaction terminology always includes “R” in the end standing for reaction(s). Although “CO<sub>2</sub>R”, “N<sub>2</sub>OR” and “NO<sub>2</sub>R” might not cause too much confusion, the acronym “NOR” actually stands for the nitrogen oxidation reaction. Overall, conversion of all “XR” to “XRR” is recommended.

**Reply:**

We agree that NOR may be interpreted as nitrogen oxidation reaction. All terminologies have been modified to “CO<sub>2</sub>RR”, “NORR”, “NO<sub>2</sub>RR”, and “N<sub>2</sub>ORR”.

10| “electron efficiency” is quite a strange term that does not help explaining what faradaic efficiency is. To be confident that the reviewer’s memory does not fail them, classical electrochemistry textbooks and Bard’s electrochemical dictionary have been checked before writing this comment.

**Reply:**

We have removed the term “electron efficiency” and redefined Faradaic efficiency:

“... Faradaic efficiency (FE; i.e., number of electrons transferred to desired products divided by the total number of electrons passed in the system) ...” (Page 1, Lines 40-41)

11| Tables S5-S7 – why Total value is “n/a”? Besides, it might be more informative to use < [LOD value], rather than unexplained “n/a” abbreviation for the components that were not detected (if the reviewer interprets these data correctly).

**Reply:**

In the original submission, we did not quantify the amount of H<sub>2</sub>. In the revision, the amount of H<sub>2</sub> is now accurately quantified, and the results are provided in Tables S7-8.

12| XPS spectra = X-ray photoelectron spectroscopy spectra = salty salt.

**Reply:**

The term “XPS spectra” has been modified to “XPS measurements.”

13| Line 273: “1 cm<sup>-2</sup>” should be fixed.

**Reply:**

The unit has been corrected.

14| Line 302: “um” should be “μm”.

**Reply:**

The unit has been corrected.

### Reviewer #3 (Remarks to the Author):

#### Summary:

The article submitted for publication by Ko and coworkers examines the impact of NO<sub>x</sub> impurities upon electrochemical CO<sub>2</sub> reduction. The authors study Cu, Ag, and Sn, which are highly active CO<sub>2</sub> reduction catalysts for C<sub>2</sub>+ products, CO, and formate, respectively. The authors find that of the impurities NO, NO<sub>2</sub>, and N<sub>2</sub>O, it is primarily NO and NO<sub>2</sub> which negatively but reversibly impact the performance of high-rate GDE flow cell systems for CO<sub>2</sub> electrolysis. The results of the study indicate that when NO<sub>x</sub> impurities are added to the gas feed stream during CO<sub>2</sub> reduction, FE for CO<sub>2</sub> reduction decreases due to the competing NO<sub>x</sub> reduction reactions, which in the case of NO reduction largely produces NH<sub>3</sub> (as well as some N<sub>2</sub>O on Cu), and in the case of N<sub>2</sub>O reduction largely produces N<sub>2</sub> (except over Sn where N<sub>2</sub>O is not easily reduced). Catalytic performance of CO<sub>2</sub> reduction bounces back, however, when the NO<sub>x</sub> impurities are removed. The authors argue based on catalyst characterization data that the presence of NO<sub>x</sub> during electrolysis results in nitridation of the carbon paper catalyst support, while the metal catalyst particles are unaffected, in part due to the reductive potential of the cathode.

This is an impactful and important paper for the field of CO<sub>2</sub> reduction in that it evaluates a crucial practical aspect of high-rate CO<sub>2</sub> electrolysis that will influence practical implementation, while taking a basic science perspective to this question. The catalysts chosen for study, as well as the conditions of the study (i.e. a high-rate flow cell setup), were well-selected for practical applicability. However, there are some questions which should be addressed by the authors to strengthen their work and clarify both their procedures and conclusions. These questions and suggestions are grouped below:

We thank the reviewer for the helpful discussion and comments. We have addressed the comments and revised the manuscript accordingly.

#### 1. Site blocking:

What are the authors' conclusions or next hypotheses based on the competition effect that they observe? I'm particularly interested in distinguishing the "competing reaction" versus the "site-blocking" depiction, which is shown in figure 1A. Clearly the reactions are occurring concurrently, which is what the first panel shows. But based on Figure 2, there is no distinct change in cathodic operating potential as NO is added to the feed stream. A decrease in CO<sub>2</sub>R FE at constant current means the CO<sub>2</sub> partial current has decreased. This happening while potential is held more or less constant would imply competition for active sites, or "site blocking," not necessarily brought about by catalyst poisoning but by high coverage of active sites which are dynamically exchanging substrates. What do the authors think about this? Do they have an alternative explanation for why partial current for CO<sub>2</sub>R would decrease at a constant potential? (Note: if potential is not roughly constant, then the potential axis on Figure 2 needs to be re-scaled to accurately depict changes.)

#### Reply:

Thank you for the fruitful comment. We actually observe a shift in cathodic potential when NO is introduced during CO<sub>2</sub>RR. We have conducted the experiment more carefully and adjusted the scale of the potential axis to show this more clearly (Fig. R8). Although the change in potential is unclear for Ag catalyst, due to the large fluctuation in potential caused by the continuous bubble formation and flush out at the electrode surface, CV

measurements with CO<sub>2</sub> and 0.83% NO clearly show the shift in potential for all three catalysts (Fig. S3). Even though we do not exclude the possibility of “site-blocking,” brought by high coverage of active sites by NO, NORR intermediates, and NORR products, our hypothesis that the main effect of NO<sub>x</sub> during CO<sub>2</sub>RR is “competing reaction” still holds. The main effect of NO<sub>x</sub> is reducing CO<sub>2</sub>RR partial current densities from the preferential reduction of NO<sub>x</sub>, which are thermodynamically more favorable.

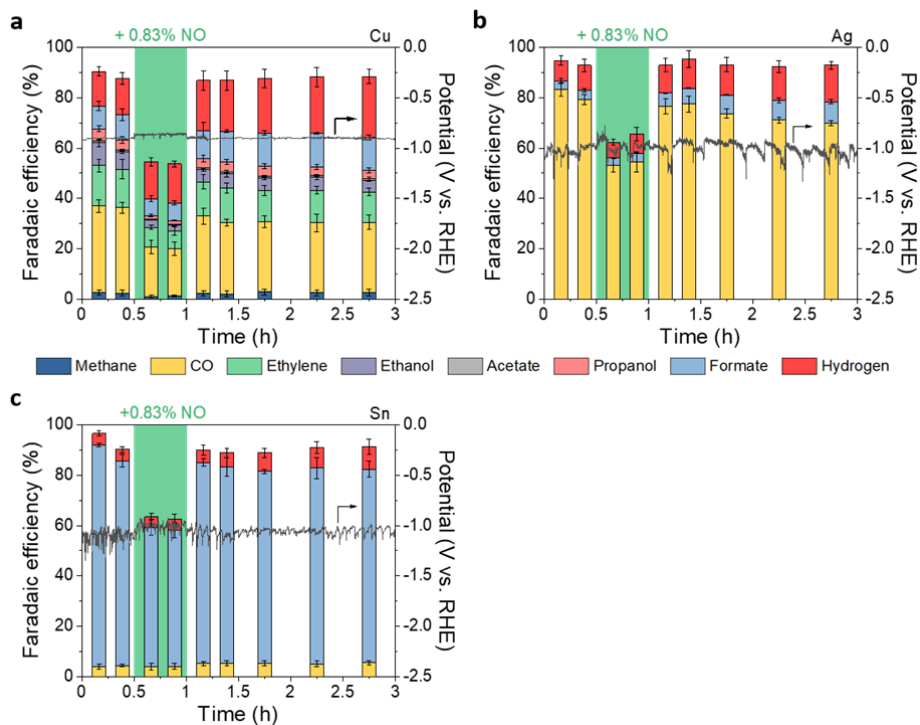

**Figure R8. (New Figure 2a-c).** CO<sub>2</sub> electroreduction performance in the presence of NO. Faradaic efficiency and applied potential vs. time on (a) Cu, (b) Ag, and (c) Sn catalysts at a constant current density of 100 mA cm<sup>-2</sup> in 1 M KHCO<sub>3</sub> for 3 h. Gas feed was 83.3% CO<sub>2</sub> and 16.7% Ar, and 83.3% CO<sub>2</sub>, 15.87% Ar, and 0.83% NO (green). 0.83% NO was introduced at 0.5 h for 0.5 h. Corresponding Faradaic efficiencies are provided in Table S2-4.

In the revised manuscript, we have adjusted the scale of potential axis to show the potential profiles more clearly.

## 2. Transport:

a. The argument that N<sub>2</sub>O is less reactive than NO<sub>2</sub> or NO is at least partially predicated on the notion that all of these reactions are under kinetic control at the conditions of interest – is this the case? I drew up some math for a flooded system that wouldn’t apply to a GDE, but I’ll present it here anyway: NO as an example is 18x less soluble than CO<sub>2</sub> with concentration in water of around 2 mM at 25 C saturation. So 1% NO gas would result in a 0.02 mM NO solution. In flooded configuration one would not expect higher rates than hundreds of micro-Amps at most. By what factor can we expect transport-limited currents to increase in the GDE configuration, especially given the catalyst-flooding argument that the authors present?

**Reply:**

The effectiveness of the three-compartment flow cell configuration regarding gas transport has been demonstrated in our previous work on the electrochemical reduction of CO (CORR).<sup>1</sup> The solubility of CO in water at 25°C (~1mM) is even lower than NO, which has limited the CORR current densities to less than 0.5 mA cm<sup>-2</sup> on Cu catalyst in a conventional batch cell.<sup>2</sup> In contrast, >800 mA cm<sup>-2</sup> of CORR current density, which is three orders of magnitude greater than that obtained from conventional batch cells, was achieved in the three-compartment flow cell.<sup>1</sup> Similar enhancement in the mass transport of NO is expected in the three-compartment flow cell.

#### References

1. Jouny, M., Luc, W. & Jiao, F. High-rate electroreduction of carbon monoxide to multi-carbon products. *Nat. Catal.* **1**, (2018).
2. Li, C. W., Ciston, J. & Kanan, M. W. Electroreduction of carbon monoxide to liquid fuel on oxide-derived nanocrystalline copper. *Nature* **508**, 504–507 (2014).

b. The above comment could be addressed experimentally fairly easily. A good place to start is with cyclic voltammetry. Fig. S3 is interesting – I'd be curious to see what the CV would look like with 1% NO in an inert balance (N<sub>2</sub> or Ar). One would expect with the large difference in standard reduction potential between NO and CO<sub>2</sub> that the onset of NOR might be significantly positive of CO<sub>2</sub>R. It's hard to tell from these plots what the NOR looks like on its own, even if we just assume that the currents are purely additive. Is it possible that even in this GDE setup, because NO is so dilute, the reaction could be reaching transport limitations prior to CO<sub>2</sub>R onset? Especially on Ag it appears that NOR sort of "plateaus" at around -0.7 V vs. RHE at a current density of ~10 mA/cm<sup>2</sup>. It's hard to tell without the NO-only CV.

#### **Reply:**

We have conducted CV measurements with different concentrations of NO<sub>x</sub> in Ar (without CO<sub>2</sub>) on all three catalysts to better understand the onset potentials and investigate the transport of NO<sub>x</sub> (**Fig. R10-12**). More positive onset potentials of NO<sub>x</sub> electroreduction (NO<sub>x</sub>RR) compared to CO<sub>2</sub>RR have been confirmed, except for N<sub>2</sub>ORR on Sn catalyst (**Fig. R12c**), in which Sn appears to be inactive for N<sub>2</sub>ORR. The results also suggest that all NO<sub>x</sub>RR, except for N<sub>2</sub>ORR on Sn catalyst, are mass transport limited at 0.83% since the CV measurement shifts with increasing concentrations of NO<sub>x</sub>. Because NO<sub>x</sub>RR is mass transport limited at 0.83%, we no longer claim that N<sub>2</sub>O is less reactive than NO and NO<sub>2</sub>. Alternatively, we observed that the main products of NORR are NH<sub>3</sub> and NH<sub>2</sub>OH, which require 5 and 3 electrons, respectively, whereas the main product of N<sub>2</sub>RR is N<sub>2</sub>, which only requires 2 electrons. Given that all NO<sub>x</sub> readily react on the catalyst surface, the reduction of NO and NO<sub>2</sub> is expected to consume more electrons than that of N<sub>2</sub>O, and thus greater losses in FE, due to the greater number of electrons involved in the NO<sub>x</sub>RR.

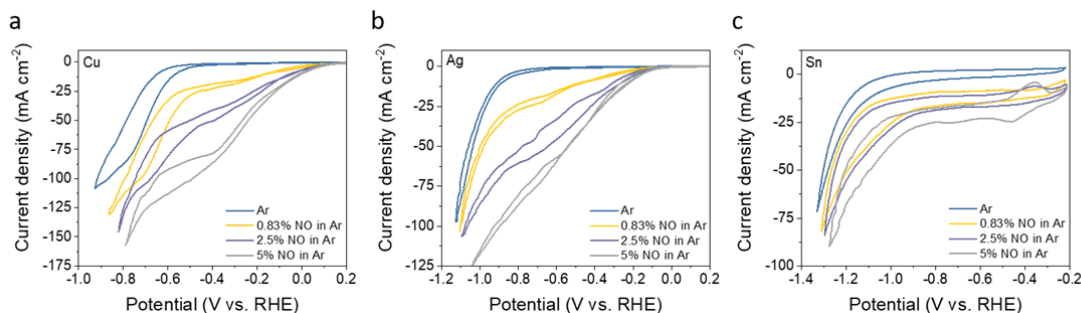

**Figure R10 (New Figure S4).** Cyclic voltammograms on (a) Cu, (b) Ag, and (c) Sn catalysts in 1M  $\text{KHCO}_3$  under different concentrations of NO in Ar. Scan rate:  $50 \text{ mV s}^{-1}$ . Shifts in CV measurements suggest that NORR is mass transport limited.

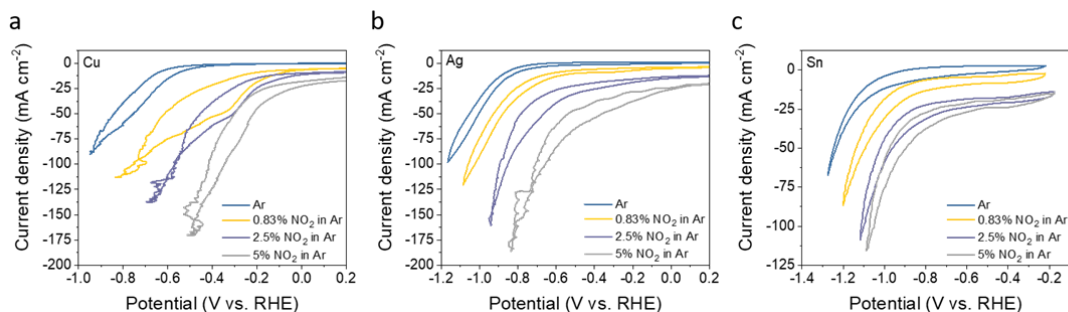

**Figure R11 (New Figure S9).** Cyclic voltammograms on (a) Cu, (b) Ag, and (c) Sn catalysts in 1M  $\text{KHCO}_3$  under different concentrations of  $\text{NO}_2$  in Ar. Scan rate:  $50 \text{ mV s}^{-1}$ . Shifts in CV measurements suggest that  $\text{NO}_2\text{RR}$  is mass transport limited.

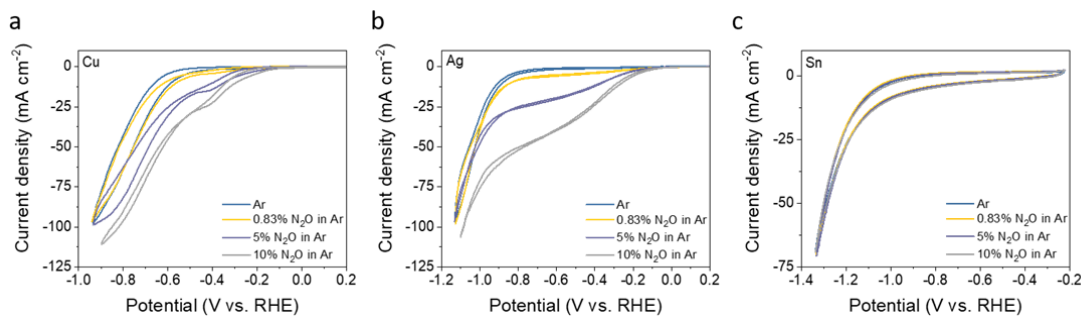

**Figure R12 (New Figure S11).** Cyclic voltammograms on (a) Cu, (b) Ag, and (c) Sn catalysts in 1M  $\text{KHCO}_3$  under different concentrations of  $\text{N}_2\text{O}$  in Ar. Scan rate:  $50 \text{ mV s}^{-1}$ . Shifts in CV measurements on Cu and Ag catalysts suggest that  $\text{NO}_2\text{RR}$  is mass transport limited.  $\text{N}_2\text{O}$  had negligible effect on Sn catalyst.

In the revised manuscript, we have added these figures and revised the discussion. The following sentences are now included in the revised manuscript:

“NO and  $\text{NO}_2$  impurities have more severe impacts on  $\text{CO}_2\text{RR}$  FE than  $\text{N}_2\text{O}$ , likely due to the greater number of electrons required in the  $\text{NO}_x$  reactions.” (Page 3, Lines 71-72)

“CV measurements under different concentrations of NO in Ar also confirmed more positive onset potentials of NORR than  $\text{CO}_2\text{RR}$  and showed that NORR at 0.83% NO is mass transport limited (Fig. S4).” (Page 5, Lines 124-126)

“NO and NO<sub>2</sub> show greater losses in FE than N<sub>2</sub>O on all three catalysts, likely due to the greater number of electrons required in the reactions. As will be discussed in the following section, the main products of NORR are NH<sub>3</sub> and NH<sub>2</sub>OH, which require 5 and 3 electrons, respectively, while the main product of N<sub>2</sub>ORR is N<sub>2</sub>. Given that all NO<sub>x</sub> readily reacts at the catalyst surface, the same amount of NO and NO<sub>2</sub> consume more electrons than N<sub>2</sub>O, causing greater losses in CO<sub>2</sub>RR FE.” (Page 6, Lines 168-173)

“The impact of NO and NO<sub>2</sub> is more severe than that of N<sub>2</sub>O in CO<sub>2</sub>RR due to the greater number electrons involved in NORR and NO<sub>2</sub>RR compared to N<sub>2</sub>ORR.” (Page 10, Lines 303-305)

### 3. Gas composition choices & procedures:

a. Methods: Flow Cell Electrolysis – this section says that stock gases were already dilute: NO stock was 5% in Ar and NO<sub>2</sub> was 1% in Ar. This means that a large portion of the inlet gas consisted of Ar. Can the authors speak to how they kept the partial pressure of CO<sub>2</sub> constant in the electrolysis cell across all conditions? This is important, because unless this constant-CO<sub>2</sub>-pressure condition was met, the decrease in CO<sub>2</sub>RR FE could be attributed merely to lower CO<sub>2</sub> partial pressures rather than to the interference of NO<sub>x</sub> as the authors claim. (Note that constant mass flow does not equate to constant pressure!)

#### Reply:

Please see our response to **Q2 from Reviewer 2**. In short, to eliminate the effect of the change in CO<sub>2</sub> partial pressure during the introduction of NO<sub>x</sub> mixture containing Ar (e.g., 5% NO/Ar and 5% NO<sub>2</sub>/Ar), CO<sub>2</sub> partial pressure was maintained at 0.833 bar throughout the experiment by flowing Ar with CO<sub>2</sub> (83.3% CO<sub>2</sub> and 16.7% Ar) when NO<sub>x</sub> was not required in the gas feed.

b. I’m intrigued by the authors’ choice to use 0.3% NO<sub>2</sub> while the other gases are present at 1%. Why the distinction? It seems that even if the percentage NO<sub>x</sub> component used is indicative of its concentration in industrial flue gas, we would gain more by comparing the gases in equal quantity to normalize for gas availability. The authors should justify their decision.

#### Reply:

We are sorry for the confusion. 0.3% NO<sub>2</sub> was chosen because of the gas availability at the time of the experiment (1% NO<sub>2</sub>/Ar). In the revised manuscript, we kept all NO<sub>x</sub> studies with the same composition, 83.3% CO<sub>2</sub>, 15.87% Ar, and 0.83% NO<sub>x</sub>, for a fair comparison. The influence of 0.83% NO<sub>2</sub> in CO<sub>2</sub>RR at constant current density of 100 mA cm<sup>-2</sup> is shown in **Fig. R13**. The losses in CO<sub>2</sub>RR Faradaic efficiency caused by 0.83% NO<sub>2</sub> is compared with those of NO and N<sub>2</sub>O in **Fig. R14**.

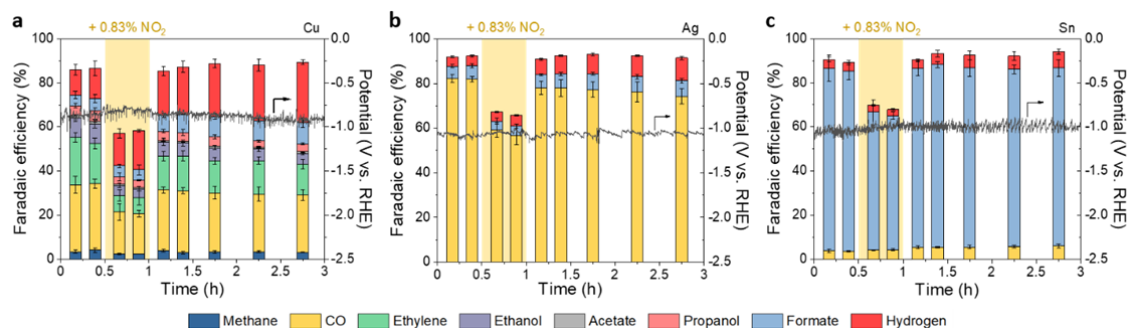

**Figure R13 (New Figure S6).** Faradaic efficiency and applied potential vs. time on (a) Cu, (b) Ag, and (c) Sn catalysts at a constant current density of  $100 \text{ mA cm}^{-2}$  in  $1 \text{ M KHCO}_3$  for 3 h. Gas feed was 83.3%  $\text{CO}_2$  and 16.7% Ar, and 83.3%  $\text{CO}_2$ , 15.87% Ar, and 0.83%  $\text{NO}_2$  (yellow). 0.83%  $\text{NO}_2$  was introduced at 0.5 h for 0.5 h. Corresponding Faradaic efficiencies are provided in Tables S7-9. Error bars represent the standard deviation of three independent measurements. Faradaic efficiency decreases with the introduction of  $\text{NO}_2$  on all three catalysts.

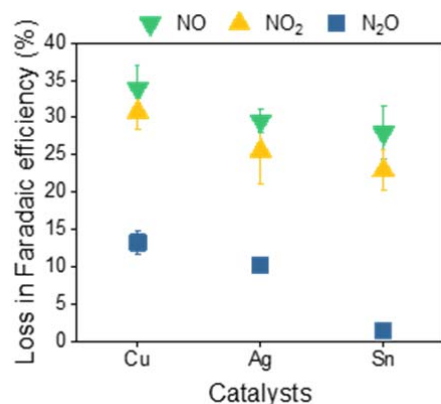

**Figure R14 (New Figure 3c).** Loss in Faradaic efficiency during  $\text{CO}_2$  electroreduction due to 0.83%  $\text{NO}$ , 0.83%  $\text{NO}_2$ , and 0.83%  $\text{N}_2\text{O}$  on Cu, Ag, and Sn catalysts. Error bars represent the standard deviation of three independent measurements.

We have also obtained XPS measurements (**Fig. R15 and 16**) and SEM images (**Fig. R17**) with 0.83%  $\text{NO}_2$ , in which the results were similar to those obtained with 0.23%  $\text{NO}_2$ . Unfortunately, new XAS results with 0.83%  $\text{NO}_2$  could not be obtained since the equipment was not accessible due to the COVID-19 pandemic. Although we present the XAS results with 0.23%  $\text{NO}_2$  instead of 0.83%  $\text{NO}_2$ , insight on the effect of the presence of  $\text{NO}_2$  during  $\text{CO}_2\text{RR}$  on the catalyst oxidation state is still obtained.

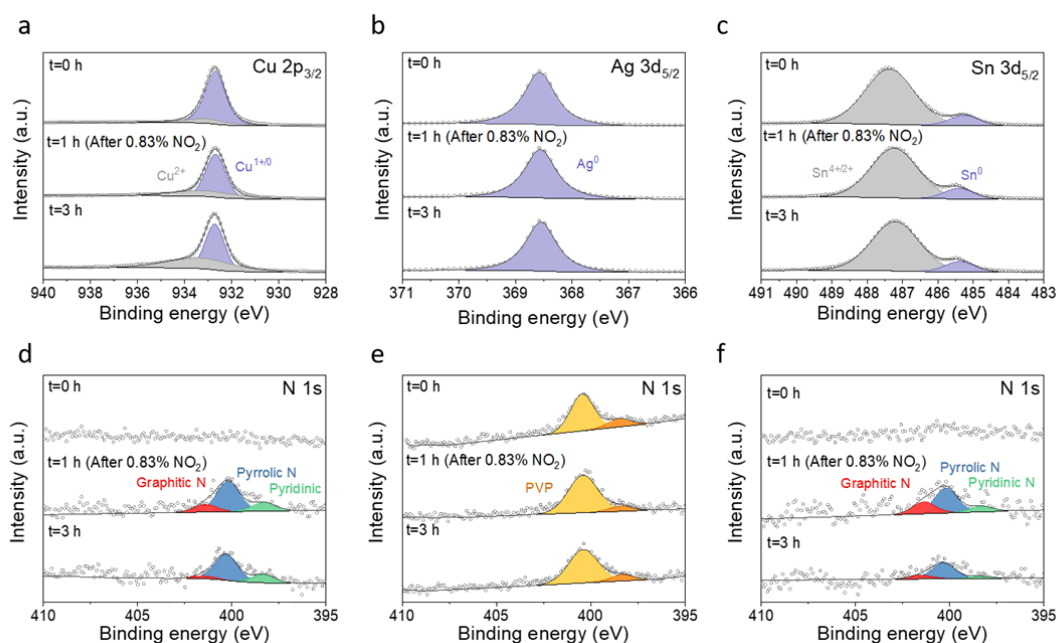

**Figure R15 (New Figure S28).** XPS measurements of (a) Cu, (b) Ag, and (c) Sn electrodes before exposure to 0.83%  $\text{NO}_2$  ( $t=0$  h), after exposure to 0.83%  $\text{NO}_2$  ( $t=1$  h), and after 3 h electrolysis ( $t=3$  h) from a  $100 \text{ mA cm}^{-2}$  constant current  $\text{CO}_2\text{RR}$  experiment with the introduction of 0.83%  $\text{NO}_2$ . Corresponding N 1s XPS measurements of (d) Cu, (e) Ag, and (f) Sn electrodes. Incorporation of N into GDL is observed on Cu and Sn electrodes. In the case of Ag electrode, the investigation of N incorporation was limited due to the presence of PVP surfactant. Corresponding details are provided in Table S13.

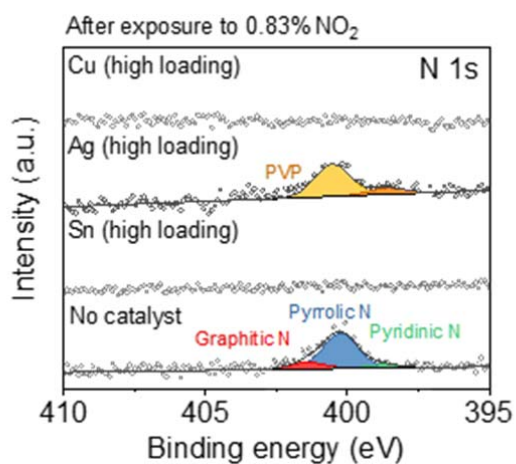

**Figure R16 (New Figure S30b).** XPS measurements of electrodes with high catalyst loadings of  $2.0 \text{ mg cm}^{-2}$  Cu, Ag, and Sn, and no catalyst at  $t=1$  h after exposure to (a) 0.83%  $\text{NO}$ , (b) 0.83%  $\text{NO}_2$ , and (c) 0.83%  $\text{N}_2\text{O}$  for 0.5 h. The results confirm that N is incorporated in GDL rather than metal catalysts.



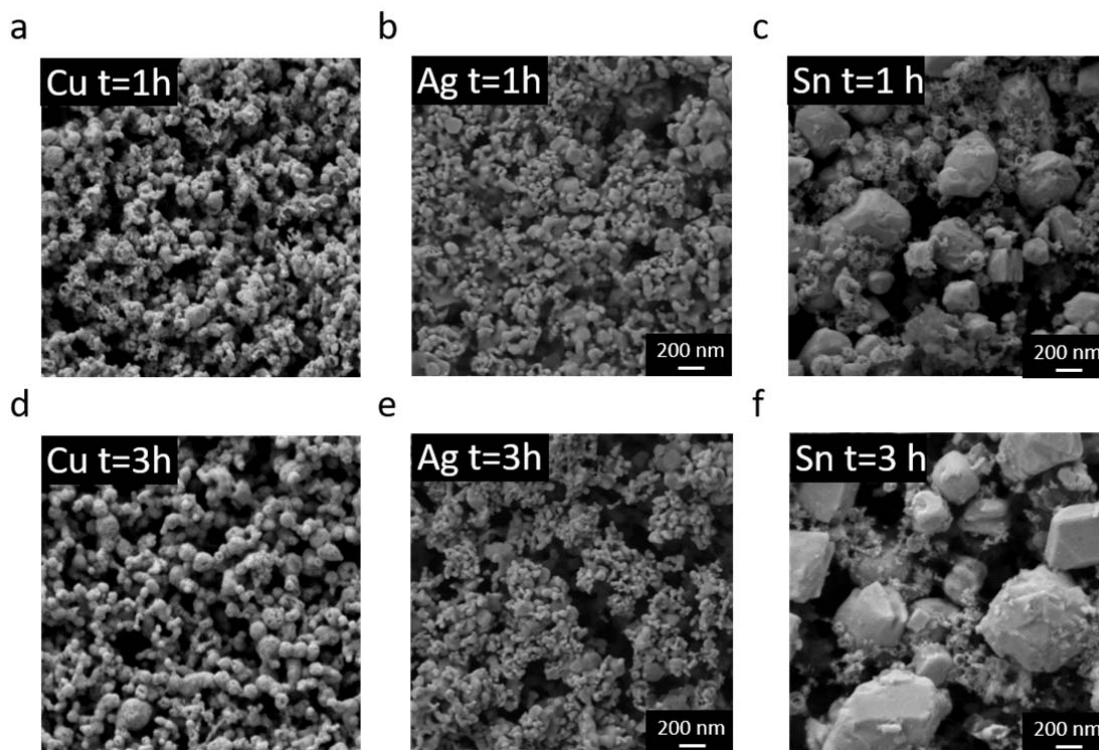

**Figure R17 (New Figure S34b and e, S35b and e, and S36b and e).** SEM images of Cu electrodes obtained at (a)  $t=1$  h and (d)  $t=3$  h, Ag electrodes obtained at (b)  $t=1$  h and (e)  $t=3$  h, and Sn electrodes obtained at (c)  $t=1$  h and (f)  $t=3$  h after exposure to 0.83%  $\text{NO}_2$ .

In the revised manuscript, we have replaced all  $\text{NO}_2$  data with 0.83%  $\text{NO}_2$  except for the XAS results. We have specifically stated that the XAS experiment was conducted with 0.23%  $\text{NO}_2$  and added the following explanation in the figure caption (**Fig. S32**): “Although 0.23% was used instead of 0.83% due to the availability of the gas at the time of the experiment, insight on the effect of the presence of  $\text{NO}_2$  during  $\text{CO}_2\text{RR}$  on the catalyst oxidation state is still obtained.”

c. In all of the cases where FEMS was used, the authors have justified their use of 1% NO in Ar rather than in  $\text{CO}_2$ . It appears that the total current density applied during these tests was the same as that applied in the experiments with 1% NO in  $\text{CO}_2$ . It would seem that the potential required in order to achieve this current would be greater in the case of 99% inert gas than it would be in the case of fully reactive gas. What is the cathode potential during these tests without  $\text{CO}_2$ ? If the cathode has to be held at a higher potential in order to achieve the same current density, then is not the NOR facing a different overpotential? How then are the results in the presence of 99% Ar translatable to a system with 99%  $\text{CO}_2$ , when the catalytic system used to interrogate  $\text{CO}_2$  reduction response to  $\text{NO}_x$  and the one used to interrogate  $\text{NO}_x$  reduction products both contain different gases and are held at different potentials?

**Reply:**

We agree with the reviewer that the operating potentials to achieve  $100 \text{ mA cm}^{-2}$  for 0.83% NO in Ar are different from those of 0.83% NO in  $\text{CO}_2$ , and it would be more appropriate to conduct the FEMS experiment at the same potentials. Therefore, we have conducted the

FEMS experiment at constant potentials at -0.90, -1.00, and -1.05 V vs. RHE on Cu, Ag, and Sn catalysts, respectively. (Fig. R18-20) As suggested later in Q8e from reviewer 3,  $m/z=28$  gives more direct evidence of the formation of  $N_2$ , so we now present  $m/z=28$  instead of  $m/z=14$  to show the production of  $N_2$ . We have also switched to using  $m/z=12$  from  $m/z=22$  to obtain the background coming from  $CO_2$  in the electrolyte, since  $m/z=12$  gives twice as greater signal of  $CO_2$  than  $m/z=22$ . We observed the production of  $H_2$  ( $m/z=2$ ),  $NH_3$  ( $m/z=17$ ),  $N_2$  ( $m/z=28$ ), and  $N_2O$  ( $m/z=44$ ) and the consumption of  $NO$  ( $m/z=30$ ) on Cu and Ag catalysts. In contrast, the production of  $NH_3$  was not observed on Sn, likely due to the extremely small amount of  $NH_3$  produced. FEMS results are consistent with the results obtained from spectrophotometry and GC analysis, and the production of  $N_2O$ , which was difficult to measure via GC, was clearly observed in FEMS.

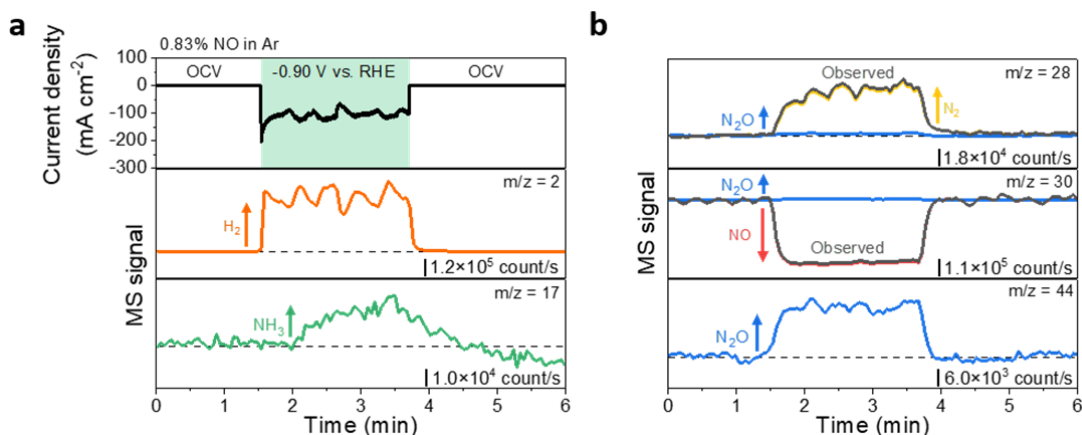

**Figure R18 (New Figure 4c and d).** (a) Measured current density vs. time, and deconvoluted MS signal vs. time for  $m/z=2$ ,  $m/z=17$ , (b)  $m/z=28$ ,  $m/z=30$ , and  $m/z=44$  from FEMS on Cu catalyst in 1M  $KHCO_3$  with 0.83% NO in Ar. -0.90 V vs. RHE was applied for approximately 2 minutes starting at  $t=1.5$  min. NORR products have been deconvoluted using the mass spectra of individual products shown in Fig. S11. Additional information is provided in the methods section and Fig. S18 and 19.

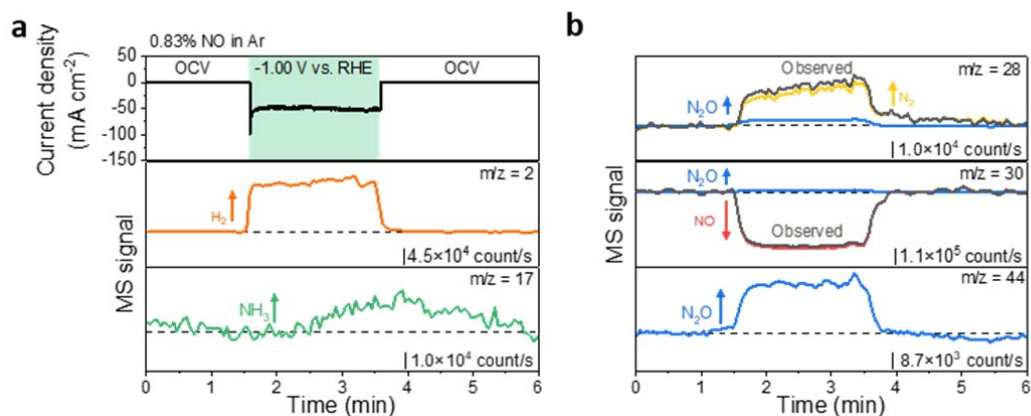

**Figure R19 (New Figure S22).** (a) Measured current density vs. time, and deconvoluted MS signal vs. time for  $m/z=2$ ,  $m/z=17$ , (b)  $m/z=28$ ,  $m/z=30$ , and  $m/z=44$  from FEMS on Ag catalyst in 1M  $KHCO_3$  with 0.83% NO in Ar. -1.00 V vs. RHE was applied for approximately 2 minutes starting at  $t=1.5$  min. NORR products have been deconvoluted using the mass spectra of individual products shown in Fig. S11. Additional information is provided in the

methods section and Fig. S18 and 19.

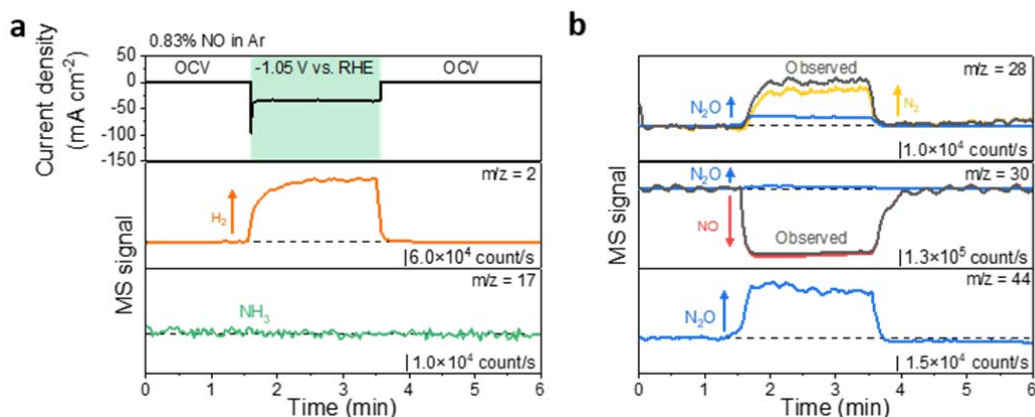

**Figure R20 (New Figure S25).** (a) Measured current density vs. time, and deconvoluted MS signal vs. time for  $m/z=2$ ,  $m/z=17$ , (b)  $m/z=28$ ,  $m/z=30$ , and  $m/z=44$  from FEMS on Sn catalyst in 1M  $\text{KHCO}_3$  with 0.83% NO in Ar. -1.05 V vs. RHE was applied for approximately 2 minutes starting at  $t=1.5$  min. NORR products have been deconvoluted using the mass spectra of individual products shown in Fig. S11. Additional information is provided in the methods section and Fig. S21 and 22.

In the revised manuscript, we include the new FEMS data conducted at constant potential and the following discussion:

“When a constant potential of -0.90 V vs. RHE was applied at  $t=1.5$  for approximately 2 minutes, MS signals of NO ( $m/z=30$ ) decreased while those of  $\text{H}_2$  ( $m/z=2$ ),  $\text{NH}_3$  ( $m/z=17$ ),  $\text{N}_2$  ( $m/z=28$ ) and  $\text{N}_2\text{O}$  ( $m/z=44$ ) increased (Fig. 4c and d), indicating the consumption of NO and the formation of  $\text{H}_2$ ,  $\text{NH}_3$ ,  $\text{N}_2$ , and  $\text{N}_2\text{O}$ . The formation of  $\text{NH}_3$  and  $\text{N}_2$  detected by FEMS is in agreement with the results obtained from spectrophotometry and GC analysis, respectively. The production of  $\text{N}_2\text{O}$ , which was difficult to measure via GC, was clearly observed in FEMS, suggesting that  $\text{N}_2\text{O}$  is also one of the NORR products.  $\text{NH}_2\text{OH}$  was not detected in FEMS, because it is nonvolatile.<sup>33</sup> Similarly, FEMS results also suggest the formation of  $\text{N}_2$  and  $\text{N}_2\text{O}$  on Ag and Sn catalysts (Figs. S20-25). However, the formation of  $\text{NH}_3$  was observed only on Ag and not on Sn, likely due to the small amount of  $\text{NH}_3$  produced on Sn. Collectively,  $\text{NH}_3$ ,  $\text{NH}_2\text{OH}$ ,  $\text{N}_2$ , and  $\text{N}_2\text{O}$  have been determined as the NORR products.” (Page 8, Lines 221-231)

d.  $\text{NO}_2$  hydrolyzes in water to generate nitric acid and nitrous acid. To what extent does the gas dissolve into the electrolyte? Could this affect the catalyst? Is this effect dampened by the fact that the electrolyte is constantly replenished?

#### Reply:

We have measured the pH at the outlet of the electrolyzer at different time points (i.e., before, during, and after  $\text{NO}_x$  introduction during  $\text{CO}_2\text{RR}$ ) (Fig. R21). The introduction of NO and  $\text{N}_2\text{O}$  had negligible effect on the pH, while  $\text{NO}_2$  reduced the pH slightly by 0.03. Although  $\text{NO}_2$  hydrolyzes to generate nitric acid and nitrous acid, the effect of  $\text{NO}_2$  in pH was very small, possibly due to the low amount of  $\text{NO}_2$  in the gas feed, rapid reaction of  $\text{NO}_2$  at the catalyst surface, which prevents  $\text{NO}_2$  from penetrating to the bulk electrolyte, and flowing electrolyte which is constantly replenished.

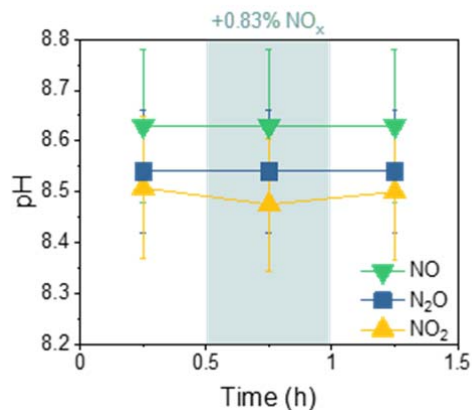

**Figure R21 (New Figure S12).** pH measured at the outlet of the electrolyzer from a constant 100-mA cm<sup>-2</sup> CO<sub>2</sub>RR experiment with the introduction of various NO<sub>x</sub>. pH of 1M KHCO<sub>3</sub> before entering the electrolyzer was 7.8±0.1. Error bars represent the standard deviation of independent measurements from Cu, Ag, and Sn catalysts. The presence of NO and N<sub>2</sub>O has negligible effect in pH, while the presence of NO<sub>2</sub> slightly decreases the pH by 0.03.

In the revised manuscript, we have included the discussion on the effect of NO<sub>x</sub> in pH as follows:

“Furthermore, pH was measured at the outlet of the electrolyzer at different time points (i.e., before, during, and after NO<sub>x</sub> introduction) to investigate the effect of NO<sub>x</sub> on the electrolyte pH (Fig. S12). The measured pH shows that NO and N<sub>2</sub>O have negligible effect on the pH, while NO<sub>2</sub> slightly decreases the pH by 0.03. Although NO<sub>2</sub> hydrolyzes to produce nitric acid and nitrous acid,<sup>26</sup> the effect in pH is very small, possibly due to the low amount of NO<sub>2</sub> in the gas feed, rapid reaction of NO<sub>2</sub> at the catalyst surface which prevents NO<sub>2</sub> from penetrating to the bulk electrolyte, and flowing electrolyte which is constantly replenished.” (Page 5, Lines 179-186)

#### 4. N<sub>2</sub>O as a less-reactive species:

a. Line 133: the authors claim that CO<sub>2</sub>RR on Sn catalyst is not affected by the presence of N<sub>2</sub>O because Sn is a bad N<sub>2</sub>O catalyst, then provide a citation. However, in the citation it appears that at -1.7 V vs. Ag/AgCl (a potential within the range of CVs in the present work’s SI), Sn catalyzes N<sub>2</sub>O reduction to N<sub>2</sub> with ~70% FE at a total current of 8 mA/cm<sup>2</sup>, and this was in a flooded electrode configuration, although at 100% N<sub>2</sub>O. Is the explanation that the current toward N<sub>2</sub>O reduction is small in comparison to the 100 mA/cm<sup>2</sup> current being drawn by CO<sub>2</sub> reduction? Could concurrent CO<sub>2</sub> reduction actually diminish the amount of N<sub>2</sub>O reduction occurring? It would be nice if the authors could give their thoughts.

#### Reply:

In the provided reference, Sn requires much greater overpotential (~ 1 V) to achieve 8 mA cm<sup>-2</sup> of N<sub>2</sub>ORR compared to Cu and Ag, suggesting that Sn is less effective in N<sub>2</sub>ORR than Cu and Ag. We have performed CV measurements with different concentrations of N<sub>2</sub>O in Ar, in the absence of CO<sub>2</sub>, on all three catalysts (Fig. R12). We observed that the CV measurement on Sn catalyst did not change even when 10% N<sub>2</sub>O was introduced, whereas clear shifts were observed on Cu and Ag catalysts. Therefore, the concurrent CO<sub>2</sub>RR is unlikely responsible for the low activity of N<sub>2</sub>ORR on the Sn catalyst.

b. Lines 143-145 suggest that Cu is a good NO<sub>x</sub> reduction catalyst and point to this as a direction for future study. It is worth pointing out that citation 23 mentioned above does actually include Cu as one of the best-performing N<sub>2</sub>O reduction catalysts, achieving high FEs for N<sub>2</sub>O to N<sub>2</sub> at relatively low overpotentials.

**Reply:**

We thank the reviewer to point it out. In the revised manuscript, we have added the following discussion:

“Indeed, Cu has been demonstrated as one of the more active metals for the electroreduction of NO<sup>27</sup> and N<sub>2</sub>O,<sup>25</sup> in which Cu achieved high FE in N<sub>2</sub>ORR to N<sub>2</sub> at relatively low overpotentials.” (Page 6, Lines 174-176)

5. Catalyst oxidation state:

It seems that the factors of oxidation by NO<sub>x</sub> and reduction by potential are competing here. The authors have shown that pre-treated catalysts will revert back to metal under reductive potential, but this does not necessarily mean that this is the case even when the catalyst is being actively exposed to NO<sub>x</sub>. It seems that in-operando experiments would be most useful here to definitively show the oxidation state of the catalyst. However, lacking sure evidence, I would tend to form a hypothesis in agreement with the authors’ conclusions – it would not surprise me if under the strongly reductive potentials required for CO<sub>2</sub>R, the catalysts were fully metallic.

**Reply:**

We agree that our XAS results do not provide information on the oxidation state of Cu catalysts when the catalysts are actively exposed to NO<sub>x</sub>. Instead, our results show that Cu catalyst is fully metallic under reaction conditions after the catalyst has been exposed to NO<sub>x</sub> and NO<sub>x</sub> has been removed from the CO<sub>2</sub> stream.

In the revised manuscript, we have clarified this point with the following discussion:

“XAS measurements on Cu samples exposed to NO<sub>2</sub> and N<sub>2</sub>O also exhibited similar behaviors as the NO-treated Cu sample (Figs. S32 and 33), confirming that the Cu catalyst remains or revert to fully metallic under reaction conditions after NO<sub>x</sub> is removed from the CO<sub>2</sub> stream.” (Page 10, Lines 286-289)

6. FE closure:

Can the authors explain why their FE closure is sub-90% in all cases (and sub-70% in some) even with a pure CO<sub>2</sub> feed? At such high currents there should be little issue detecting products. Can the balance be attributed to product crossover to the anolyte?

**Reply:**

We apologize for the confusion. The total FE of sub-70% was due to the unmeasured H<sub>2</sub> FE for NO<sub>2</sub> experiments (Please see our response to **Q3 from Reviewer 1**). In the revision, we have measured H<sub>2</sub> FE and the total FE is above 85%. We have observed that <3%, <2%, and 5-10% of formate FE are detected from the anode side on Cu, Ag, and Sn catalysts, respectively. Because formate crossover was substantial on Sn catalyst, all anolyte has been analyzed for and included in the Sn formate FE. This has been stated in **Tables S2-4 and 7-12**. Other missing FE may be attributed to volatile liquid products exiting with the gas stream and/or gas products exiting with the liquid electrolyte stream.

7. Transient selectivity changes:

The authors claim that increases in HER (and if I may add from my own interpretation, formate – which tends to be an “outer-sphere” CO<sub>2</sub>R product) over time are due to GDE flooding, based on a previous paper of theirs. Do we know in this instance whether this holds true? For instance, what is the 3-hour CO<sub>2</sub>R baseline (no NO added)? Could transient changes (e.g. increase in HER FE) be attributed to metal plating? This is not a huge priority, since transient changes are not on a scale that derails the central argument of the paper.

**Reply:**

We have obtained 3-hour CO<sub>2</sub>RR baseline on all three catalysts (**Fig. R3**). H<sub>2</sub> FE increases over time, and we also observed an increase in the formate FE on Cu and Ag, while the formate FE decreases on Sn. Therefore, the introduction of NO<sub>x</sub> is unlikely the cause of the transient changes in product selectivity.

8. General comments on methods and SI:

a. Could the authors provide some supporting data or at least a comprehensive reference on their Nessler’s method calibration curves, exact procedure, etc.?

**Reply:**

We have observed that Nessler’s method is unreliable for the quantification of ammonia in the presence of hydroxylamine (NH<sub>2</sub>OH). We have use indophenol blue method instead to quantify ammonia, and this will be discussed further in **Q8g from Reviewer 3**.

b. The choice to detect NOR products via FEMS is interesting. It seems that the drawback mentioned by the authors in the SI is significant: simultaneous NOR and CO<sub>2</sub>R are difficult to study. Is it not possible to use in-line gas chromatography to detect N<sub>2</sub> and N<sub>2</sub>O, as was done during N<sub>2</sub>O reduction?

**Reply:**

We have conducted GC analysis of the gas products from CO<sub>2</sub>RR in the presence of 0.83% NO and detected a substantial amount of N<sub>2</sub> (**Fig. R5**). However, the concentration of N<sub>2</sub>O was below the detection limit of GC, in which the detection limit corresponded to approximately 2% N<sub>2</sub>O FE in NORR. Therefore, a more sensitive FEMS was required to determine the formation of N<sub>2</sub>O. The production of N<sub>2</sub>O, which was difficult to measure via GC, was clearly observed in FEMS, suggesting that N<sub>2</sub>O is also one of NORR products.

In the revised manuscript, we have included the following sentences on the use of GC to quantify N<sub>2</sub> and N<sub>2</sub>O:

“... and N<sub>2</sub> was detected via GC (Fig. S15). We note that the concentration of N<sub>2</sub>O in the gas product stream was below the detection limit of GC, suggesting that N<sub>2</sub>O FE was below 2% FE on all three catalysts.”(Page 6, Lines 191-193)

c. Could the authors provide a more thorough SI explanation of the MS processing techniques used? It is currently a bit difficult to follow the logic behind these steps. After reading for quite some time I eventually ascertained that, for example, Figure S9 represents the raw data for NOR on Cu; Figure S10 shows how background contributions from water and CO<sub>2</sub> are subtracted from the m/z = 17 and 44 peaks respectively; Figure 4c shows the background-subtracted data for these two m/z and additionally m/z = 30 which contains both NO and N<sub>2</sub>O, but which can be distinguished by accounting for the N<sub>2</sub>O area based off the m/z = 44 peak as well as the ratio of peaks in the pure N<sub>2</sub>O spectrum; and Figure 4d combines all of this information to show how the m/z = 14 peak can be broken down into

contributions from NO consumed, NH<sub>3</sub> produced, and N<sub>2</sub>O produced. A description to this end would be useful.

**Reply:**

The interpretation of the reviewer is correct, and we apologize for the confusion. As mentioned previously in our response to **Q3c from Reviewer 3**, because m/z=28 gives more direct evidence of the production of N<sub>2</sub> and N<sub>2</sub>O, we now present m/z=28 instead of m/z=14.

In the revised manuscript, we have provided detailed explanation on the deconvolution procedure in the methods section.

“For the deconvolution of m/z=17 signal, m/z=17 signal from water was first determined using m/z=18 signal. Next, the contribution from water to m/z=17 signal was subtracted from the observed m/z=17 signal to obtain the signal from ammonia. For the deconvolution of m/z=28 and 44 signals, m/z=28 and 44 signals from CO<sub>2</sub> in the electrolyte was first determined using m/z=12 signal. m/z=12 signal was smoothed using the Savitzky-Golay method with a window of 30 data points to reduce the oscillations in the signal prior to deconvolution. Next, the contributions from CO<sub>2</sub> to m/z=28 and 44 were subtracted from the observed m/z=28 and 44 signals to obtain the signals from NORR products. m/z=44 signal corresponded to the signal from N<sub>2</sub>O, and this was used to calculate the contribution of N<sub>2</sub>O to m/z=28 and 30. Lastly, the contributions of N<sub>2</sub>O to m/z=28 and 30 were subtracted from the m/z=28 and 30 signals from NORR products, respectively, to yield N<sub>2</sub> and NO signals, respectively. All deconvolution was conducted using MATLAB. Mass spectra of NH<sub>4</sub>OH, NO, N<sub>2</sub>O, N<sub>2</sub>, H<sub>2</sub>O, and CO<sub>2</sub> used for the deconvolution were obtained using the same MS equipment (Fig. S17).” (Page 13, Lines 404-417)

d. The authors should provide a sample MS of CO<sub>2</sub> in Figure S11 if they're going to be using the CO<sub>2</sub> spectrum to process data.

**Reply:**

In the revised manuscript, we have provided a sample MS of H<sub>2</sub>O and CO<sub>2</sub> (**Fig. R22**), which were used for the deconvolution.

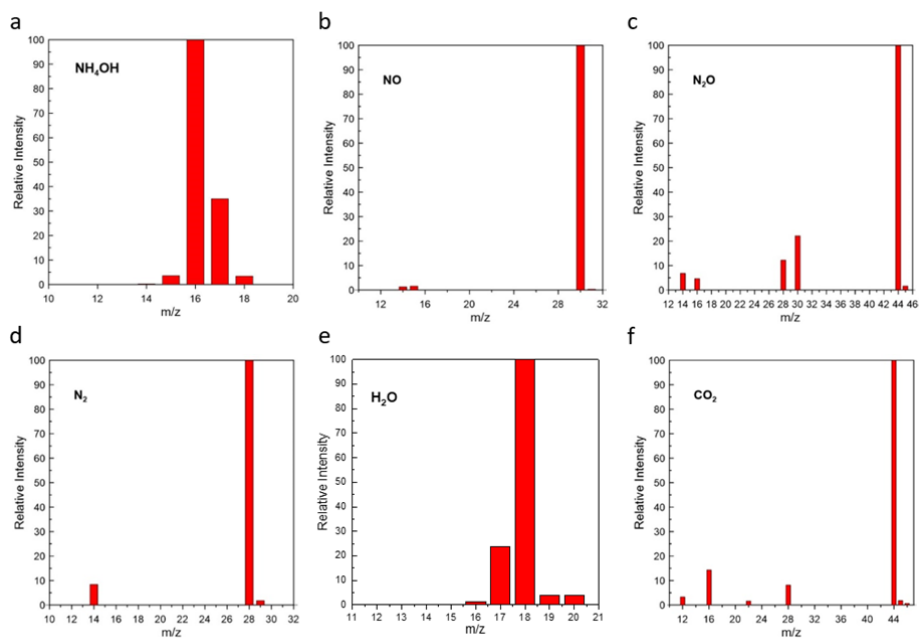

**Figure R22 (New Figure S17).** Mass spectra of (a)  $\text{NH}_4\text{OH}$ , (b)  $\text{NO}$ , (c)  $\text{N}_2\text{O}$ , (d)  $\text{N}_2$ , (e)  $\text{H}_2\text{O}$ , and (f)  $\text{CO}_2$ . MS signals were deconvoluted using the following mass spectra.

e. The authors argue that the residual of the  $m/z = 14$  peak being near-zero is sufficient to say that no  $\text{N}_2$  is produced. While I agree this should be decently good evidence for that, could we not tell this more directly (i.e. with fewer contributions to subtract out) by examining the  $m/z = 28$  peak, which only appears to contain contributions from  $\text{N}_2$  and  $\text{N}_2\text{O}$ ? Are results obtained in this manner consistent with results obtained using the authors' approach?

**Reply:**

We agree that  $m/z=28$  signal gives more direct evidence about the formation of  $\text{N}_2$  and  $\text{N}_2\text{O}$ , and we now present  $m/z=28$  signal data (Fig. R18-20). Analysis of the  $m/z=28$  signal shows that  $\text{N}_2$  is produced during NORR, although previous analysis on  $m/z=14$  signal showed that  $\text{N}_2$  is not produced. Because  $m/z=28$  signal is more reliable than  $m/z=14$  and  $\text{N}_2$  is also detected in GC analysis, we conclude that  $\text{N}_2$  is one of the NORR products on Cu, Ag, and Sn catalysts.

f. Can the authors detail the procedure for XPS and XAS preparation? Were the catalysts exposed to air in the process of transferring from electrolysis cell to XPS for analysis? If so, how long did this take? Similarly, how long before XAS were the catalysts exposed to  $\text{NO}_x$ ? In what environment were they kept in the interim?

**Reply:**

We have added more details for the XPS and XAS experiments. Please see our response to Q7 from reviewer 1.

g. Nessler's reagent is prone to significant errors in quantification and the indophenol method should be used instead to confirm results

**Reply:**



We have observed substantial interference from hydroxylamine ( $\text{NH}_2\text{OH}$ ) in Nessler's method, making Nessler's method unreliable for the quantification of ammonia when  $\text{NH}_2\text{OH}$  is present in the solution (**Fig. R23**). Instead, we have used indophenol blue method,<sup>1</sup> which is more reliable, to quantify  $\text{NH}_4\text{OH}$  (**Fig. R24**). We have confirmed that  $\text{NH}_2\text{OH}$  does not show significant absorbance in the indophenol blue method. After noticing the possibility of the production of  $\text{NH}_2\text{OH}$  during NORR, we have also quantified  $\text{NH}_2\text{OH}$  using the procedure modified from the method reported by Afkhami et al (**Fig. R25**).<sup>2</sup> We have confirmed that  $\text{NH}_4\text{OH}$  does not show significant absorbance in this method. The newly measured NORR products are shown in **Fig. R26**.  $\text{NH}_3$  substantially decreased compared to the previously reported values based on Nessler's method, and considerable amount of  $\text{NH}_2\text{OH}$  was quantified on Ag and Sn catalysts. In fact,  $\text{NH}_2\text{OH}$  has also been shown to be the main NORR products.<sup>3</sup> Overall, we observed that  $\text{NH}_3$ ,  $\text{NH}_2\text{OH}$ ,  $\text{N}_2$ , and  $\text{N}_2\text{O}$  are the main NORR products, in which the product selectivity varied among different catalysts.

### References

1. Andersen, S. Z. *et al.* A rigorous electrochemical ammonia synthesis protocol with quantitative isotope measurements. *Nature* **570**, 504–508 (2019).
2. Afkhami, A., Madrakian, T. & Maleki, A. Indirect kinetic spectrophotometric determination of hydroxylamine based on its reaction with iodate. *Anal. Sci.* **22**, 329–331 (2006).
3. Rosca, V., Duca, M., DeGroot, M. T. & Koper, M. T. M. Nitrogen Cycle Electrocatalysis. *Chem. Rev.* **109**, 2209–2244 (2009).

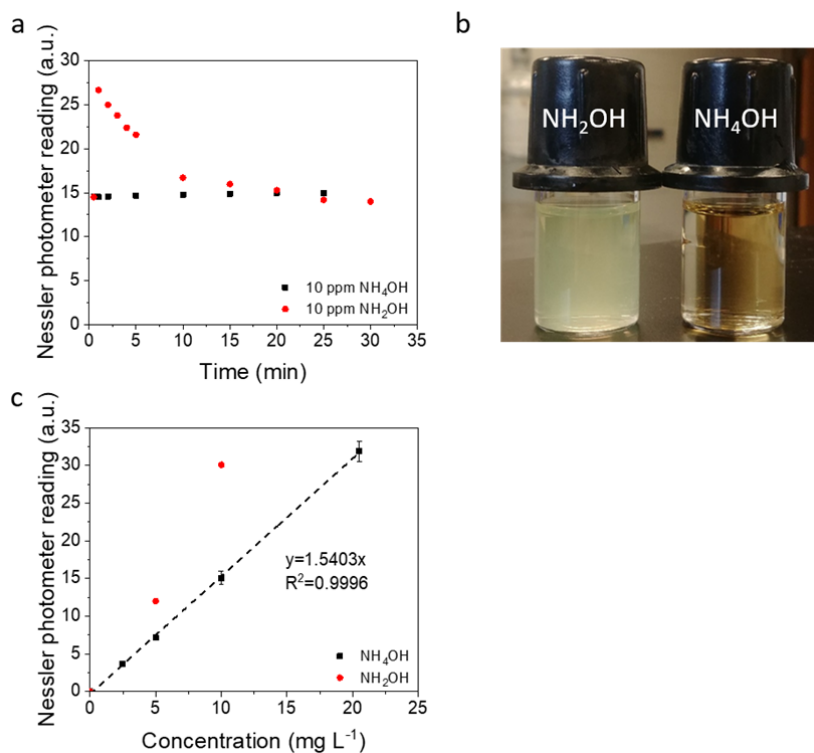

**Figure R23.** Ammonia quantification using Nessler's method. (a) Nessler photometer reading vs. time of  $10 \text{ mg L}^{-1} \text{NH}_4\text{OH}$  and  $10 \text{ mg L}^{-1} \text{NH}_2\text{OH}$ . Reaction of  $\text{NH}_4\text{OH}$  is complete almost immediately. (b) Photograph of  $10 \text{ mg L}^{-1} \text{NH}_2\text{OH}$  (left) and  $10 \text{ mg L}^{-1} \text{NH}_4\text{OH}$  (right) at 5

minutes. (c) Calibration curve for  $\text{NH}_4\text{OH}$ . Absorbance was measured at 1 minute.  $\text{NH}_2\text{OH}$  have large interference, invalidating the quantification of  $\text{NH}_4\text{OH}$  in the presence of  $\text{NH}_2\text{OH}$ . All solutions were prepared in 0.25M  $\text{KHCO}_3$  to match the condition of the liquid products in the electrolyte.

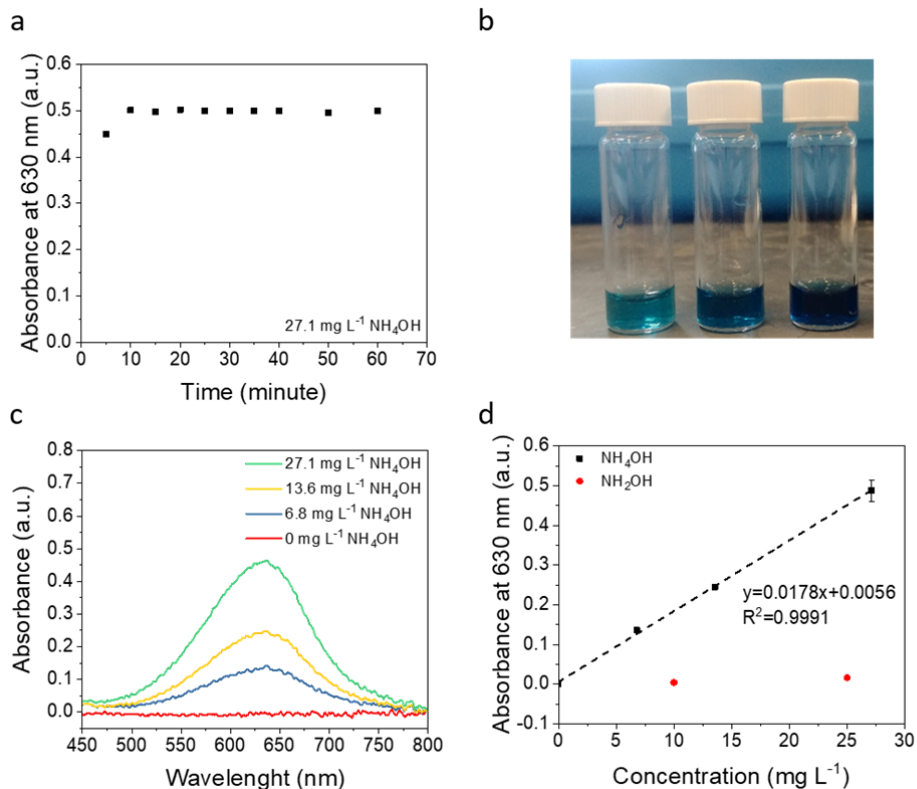

**Figure R24 (New Figure S13).** Ammonia quantification using indophenol blue method. (a) Absorbance vs. time of 27.1 mg L<sup>-1</sup> NH<sub>4</sub>OH. Reaction is complete after 10 minutes. (b) Photograph of 6.8, 13.6, and 27.1 mg L<sup>-1</sup> NH<sub>4</sub>OH (from left to right) at 20 minutes. (c) Absorption spectra for different concentrations of NH<sub>4</sub>OH measured at 20 minutes. (d) Calibration curve for NH<sub>4</sub>OH. Absorbance was measured at 20 minutes. NH<sub>2</sub>OH has negligible interference. All solutions were prepared in 0.25M  $\text{KHCO}_3$  to match the condition of the liquid products in the electrolyte.

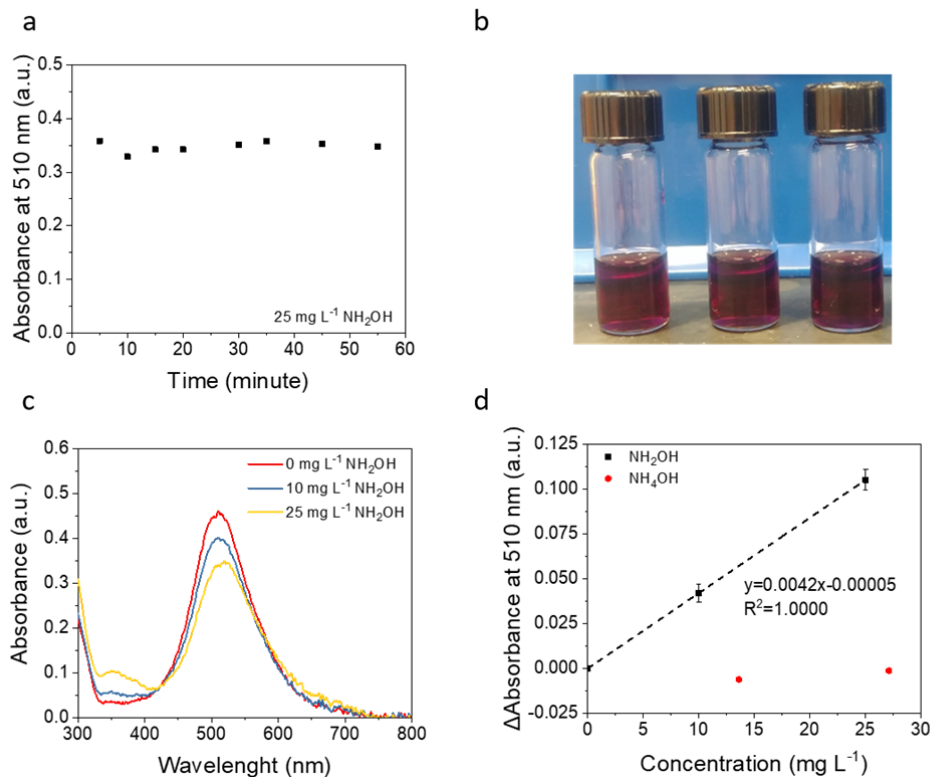

**Figure R25 (New Figure S14).** Hydroxylamine quantification. (a) Absorbance vs. time of 25 mg L<sup>-1</sup> NH<sub>2</sub>OH. Reaction is complete after 10 minutes. (b) Photograph of 0, 10, and 25 mg L<sup>-1</sup> NH<sub>2</sub>OH (from left to right) at 20 minutes. (c) Absorption spectra for different concentrations of NH<sub>2</sub>OH measured at 20 minutes. (d) Calibration curve for NH<sub>2</sub>OH. Absorbance was measured at 20 minutes. Absorbance was subtracted from that of 0 mg L<sup>-1</sup> NH<sub>2</sub>OH. NH<sub>4</sub>OH has negligible interference. All solutions were prepared in 0.25M KHCO<sub>3</sub> to match the condition of the liquid products in the electrolyte.

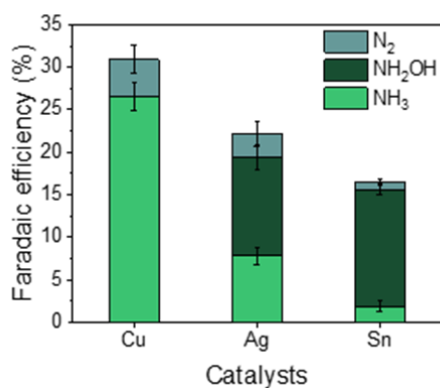

**Figure R26 (New Figure 4a).** Faradaic efficiency of NO electroreduction products produced during electrolysis with 83.3% CO<sub>2</sub>+0.83% NO in Ar on Cu, Ag, and Sn catalysts at a constant current density of 100 mA cm<sup>-2</sup> in 1 M KHCO<sub>3</sub> for 3 h. Error bars represent the standard deviation of three independent measurements.

In the revised manuscript, we have included the details of the methods to determine NH<sub>4</sub>OH and NH<sub>2</sub>OH, included references, updated the NORR products, and revised the discussion on

the NORR products as shown below:

“NH<sub>3</sub> was quantified using indophenol blue method<sup>41</sup> with UV-vis spectroscopy (Nanodrop 2000, Thermo Scientific). 100 μL of the sample was mixed with 500 μL of alkaline hypochlorite solution (A1727, Sigma-Aldrich) and 500 μL of phenol nitroprusside solution (P6994, Sigma-Aldrich). The solution was incubated in the dark at room temperature for 20 minutes. 2 μL of the solution was pipetted onto the pedestal, and the absorbance was measured by UV-vis spectroscopy from 190 nm to 840 nm. The absorbance of the sample was measured at 630 nm, and the background was subtracted with the absorbance measured at 830 nm. The calibration curves were obtained using different concentrations of ammonium hydroxide (NH<sub>4</sub>OH; 28.0-30.0%, Sigma Aldrich) in 0.25 M KHCO<sub>3</sub> (Fig. S13).” (Page 12, Lines 370-378)

“NH<sub>2</sub>OH was quantified using a procedure modified from a previous report by Afkhami et al.<sup>42</sup> with UV-vis spectroscopy (Nanodrop 2000, Thermo Scientific). Neutral red solution was prepared by dissolving 200 mg of neutral red (Sigma-Aldrich) in 100 mL DI. Iodate solution was prepared by dissolving 1.000 g of potassium iodate (KIO<sub>3</sub>, 99.995%, Sigma-Aldrich) in 100 mL DI. 500 μL of sample was mixed with 250 μL of 3.0 M sulfuric acid (Fisher Scientific) and 250 μL of iodate solution. After 5 minutes at room temperature, 500 μL of neutral red solution was added to the solution. The solution was incubated at room temperature for 20 minutes. 2 μL of the solution was pipetted onto the pedestal, and the absorbance was measured by UV-vis spectroscopy from 190 nm to 840 nm. The absorbance of the sample was measured at 510 nm, and the background was subtracted with the absorbance measured at 800 nm. The change in absorbance was determined by subtracting the absorbance of the sample solution from the absorbance of the solution with 0 mg L<sup>-1</sup> NH<sub>2</sub>OH. The calibration curves were obtained using different concentrations of hydroxylamine (50 wt % in H<sub>2</sub>O, Sigma Aldrich) in 0.25 M KHCO<sub>3</sub> (Fig. S14).” (Page 12, Lines 379-392)

“The primary products of NO<sub>x</sub> electroreduction include N<sub>2</sub>O, N<sub>2</sub>, NH<sub>2</sub>OH, and NH<sub>3</sub>.” (Page 1, Lines 19-20)

“... in which the major products are ammonia (NH<sub>3</sub>), hydroxylamine (NH<sub>2</sub>OH), N<sub>2</sub>, and N<sub>2</sub>O.” (Page 2, Lines 76-77)

“As shown in Fig. 4a, NORR product selectivity varied among different catalysts. Cu primarily produced NH<sub>3</sub> and N<sub>2</sub>, with no NH<sub>2</sub>OH, Ag produced a mixture of NORR products, and Sn primarily produced NH<sub>2</sub>OH. These observations are consistent with previous reports, in which Cu has been demonstrated as an effective catalyst for NORR to NH<sub>3</sub>,<sup>27</sup> and Sn has been used as a dopant in Pt to shift the selectivity from NH<sub>3</sub> to NH<sub>2</sub>OH in nitrate reduction.<sup>33</sup>” (Page 6 and 7, Lines 193-198)

“Collectively, NH<sub>3</sub>, NH<sub>2</sub>OH, N<sub>2</sub>, and N<sub>2</sub>O have been determined as the NORR products.” (Page 8, Lines 231)

“The major NORR products are NH<sub>3</sub>, NH<sub>2</sub>OH, N<sub>2</sub>, and N<sub>2</sub>O, in which the selectivity varies among different catalysts ...” (Page 10, Lines 305-306)

9. Small corrections and typos:

a. I would recommend including Engelbrecht et al. 2017

(<https://doi.org/10.1016/j.electacta.2016.12.059>) in the literature review – the specific goal of this paper was to oxidize the Cu catalyst by co-feeding O<sub>2</sub> during CO<sub>2</sub> reduction (second effect depicted in your Fig. 1A).

**Reply:**

We have added the reference to the revised manuscript as reference 21.

b. Two tables are listed as “Table S1” in the supporting information

**Reply:**

Table numbers have been corrected.

c. Line 188: it’s probably best to remind the reader in this spot what the loss of CO<sub>2</sub>R FE was during these tests so they don’t have to go back and look to check that this is a true statement.

**Reply:**

In the revised manuscript, the following sentence has been added:

“While the losses of CO<sub>2</sub>RR FE were 11.4%, 10.2%, and 1.4% on Cu, Ag, and Sn catalysts, respectively, the amounts of N<sub>2</sub> detected were 8.2%, 7.3%, and 0.5% of the total FE, respectively, accounting for the majority of the loss in the CO<sub>2</sub>RR FE.” (Page 8, Lines 233-235)

d. Table S11 caption: could the authors clarify what they mean by “N content has been calculated relative to metal content”? I would assume this means that the percentage column is equal to 100% times the ratio N/(N plus the nominal metal), but want to clarify.

**Reply:**

The caption for **Tables S15-17** has been changed to:

“N content has been calculated using the following equation:  $N \text{ content} = \frac{\Sigma N \text{ (wt \%)}}{\Sigma N \text{ (wt \%)} + \text{metal (wt \%)}} \times 100$ , where  $\Sigma N \text{ (wt \%)} = \text{graphitic N (wt \%)} + \text{pyrrolic N (wt \%)} + \text{pyridinic N (wt\%)}$  and  $\text{metal} = \text{Cu or Ag or Sn.}$ ”

e. Methods line 266: I’m guessing “Sn (0.1 m, Alfa Aesar)” really means 0.1 μm rather than 0.1 m. Those are some big particles if not! :)

**Reply:**

Sorry for the typo. We have corrected the unit to 0.1 μm.

f. Line 305-306: SEM here refers to secondary electron multiplier – I might suggest using terminology which corresponds to the acronym so that it’s not confusing.

**Reply:**

We have removed “SEM” and used “secondary electron detection.”

This is an important contribution to the literature - if the revisions above are made, I would advocate for accepting the article.

Reviewer #1 (Remarks to the Author):

I appreciate the comprehensive and clear revision. This paper is ready for publication and I will cite it.

Reviewer #2 (Remarks to the Author):

To the best of the reviewer's judgement, Jiao and co-workers have thoroughly addressed all comments from the first-round referees. The work is scientifically robust.

However, the authors' fully justified response to the initial comment on the NO<sub>x</sub> removal and additional clarification on the typical NO<sub>x</sub> levels in CO<sub>2</sub> further convinces the present reviewer that this work is too specialised for Nature Communications.

Reviewer #3 (Remarks to the Author):

The authors have addressed in great detail my comments regarding site blocking, transport, gas compositions, consistent conditions, oxidation state of catalyst, and FE closure. The work is now suitable for publication.
